# Supplementary material for: Which children and young people are at higher risk of severe disease and death after SARS-CoV-2 infection: a systematic review and individual patient meta-analysis
Source: bioRxiv or medRxiv preprint supplement (doi:10.1101/2021.06.30.21259763), 2021-07-08
Supplement: Supplementary file [file media-1.pdf]

# Which children and young people are at higher risk of severe disease and death after SARS-CoV-2 infection: a systematic review and individual patient meta-analysis

## Supplementary Material

### Full Search Terms

Search Terms used for Pubmed:

PubMed: ((COVID-19[Supplementary Concept] OR severe acute respiratory syndrome coronavirus 2[Supplementary Concept] OR Coronavirus Infections[MeSH Terms] OR Wuhan coronavirus[Text Word] OR Wuhan seafood market pneumonia virus[Text Word] OR COVID19\*[Text Word] OR COVID-19\*[Text Word] OR COVID-2019\*[Text Word] OR coronavirus disease 2019[Text Word] OR SARS-CoV-2[Text Word] OR SARS2[Text Word] OR 2019-nCoV\*[Text Word] OR 2019 novel coronavirus[Text Word] OR severe acute respiratory syndrome coronavirus 2[Text Word] OR 2019 novel coronavirus infection[Text Word] OR coronavirus disease 2019[Text Word] OR coronavirus disease-19[Text Word] OR novel coronavirus[Text Word] OR coronavirus[Text Word] OR SARS-CoV-19[Text Word] OR PIMS-TS[Text Word] OR paediatric inflammatory multisystem syndrome [Text Word] OR MIS-C[Text Word] OR multi-system inflammatory syndrome in children[Text Word]) AND (minors [Text Word]OR minors\* [Text Word]OR boy [Text Word]OR boys[Text Word] OR girl\*[Text Word] OR kid[Text Word] OR kids[Text Word] OR child[Text Word] OR child\*[Text Word] OR children\*[Text Word] OR schoolchild\*[Text Word] OR schoolchild[Text Word] OR school child [Text Word] OR school child\*[Text Word] OR adolescen\* [Text Word]OR juvenil\* [Text Word]OR youth\* [Text Word]OR teen\* [Text Word]OR under\*age\* [Text Word]OR pubescen\* [Text Word] OR pediatrics[mh] OR pediatric\* [Text Word]OR paediatric\* [Text Word]OR pediatric\* [Text Word]))

Filters:

Language: English only

Article type: Clinical study, clinical trial, comparative study, journal article, multicentre study, observational study, pragmatic clinical trial, randomized control trial

Age: Child: birth-18 years, Newborn: birth-1 month, Infant: birth-23 months, Infant: 1-23 months, preschool child: 2-5 years, child: 6-12 years, adolescent: 13-18 years

### Sensitivity analysis - association between demographics and outcome

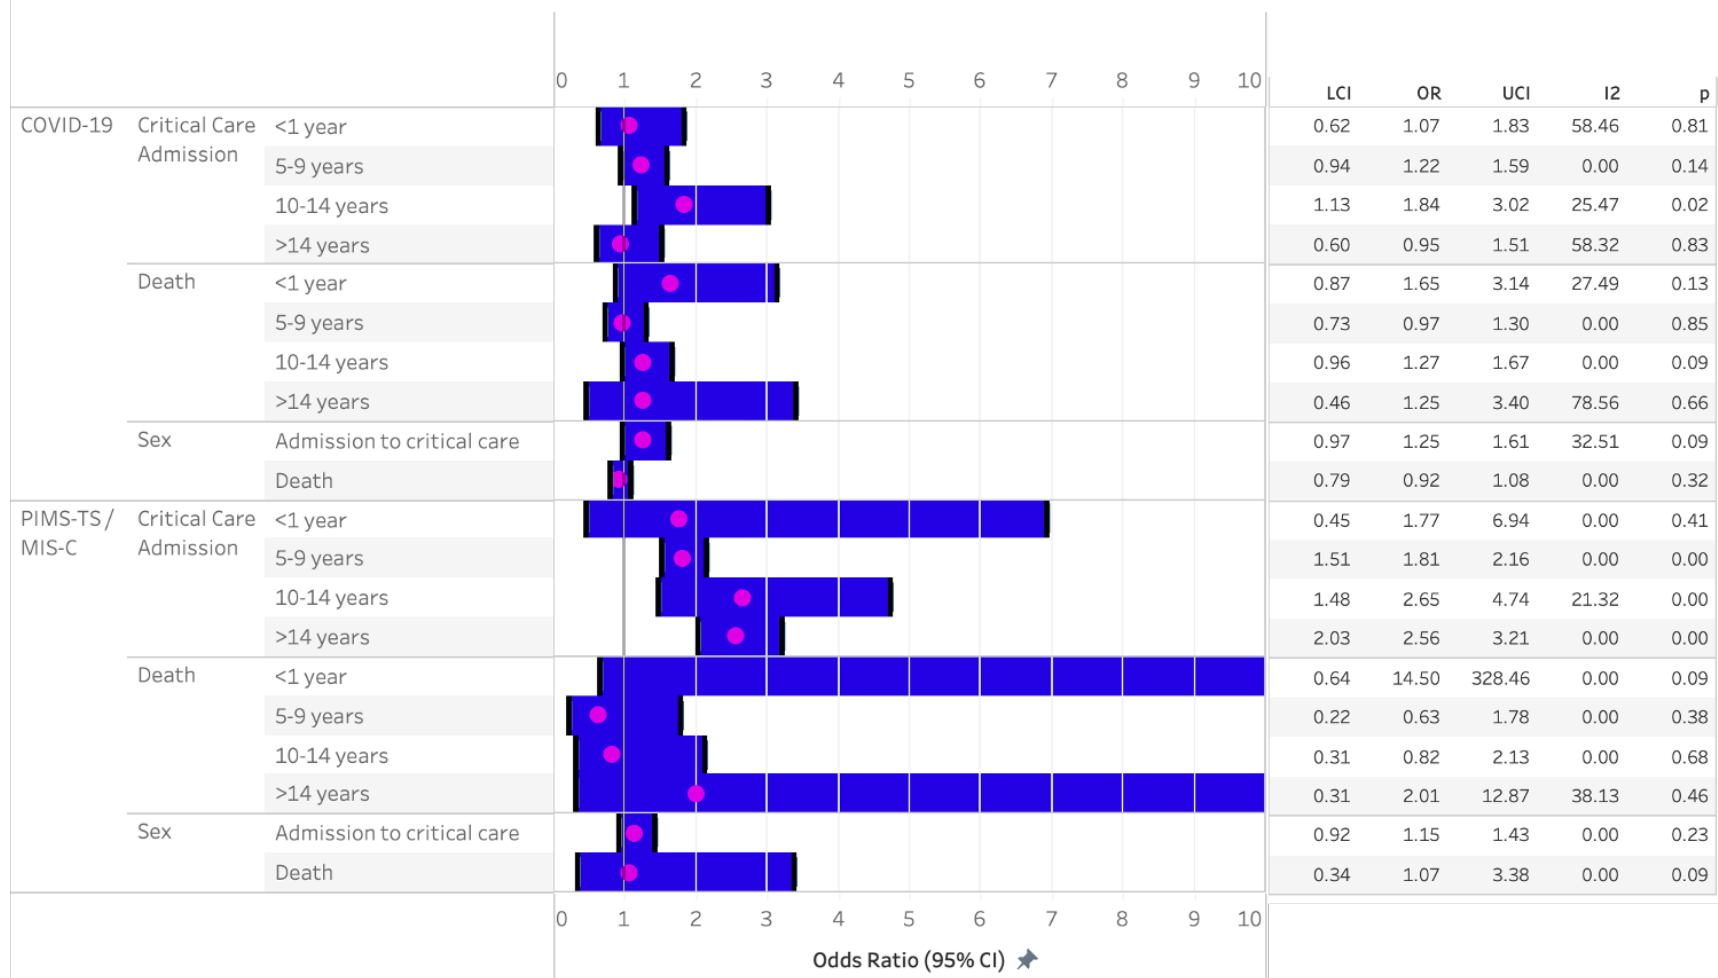

Supplementary Figure 1. Sensitivity analysis of aggregated demographic data used in meta-analysis. Largest study included in the meta-analysis excluded.

Sensitivity analysis - association between co-morbidities and outcome

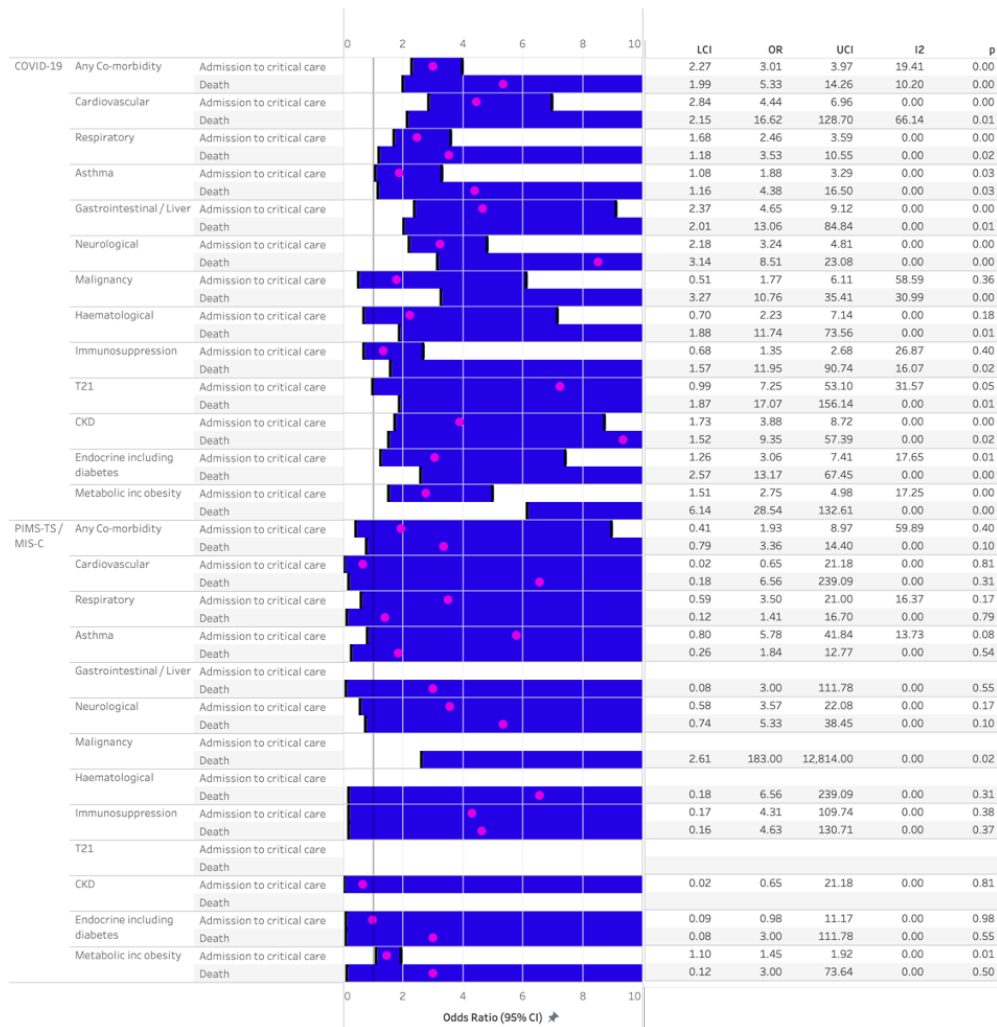

Supplementary Figure 2. Sensitivity analysis of aggregated co-morbidity data used in meta-analysis. Largest study included in the meta-analysis excluded.

### Meta-analysis of studies providing IPD - Association between demographics and severe outcome

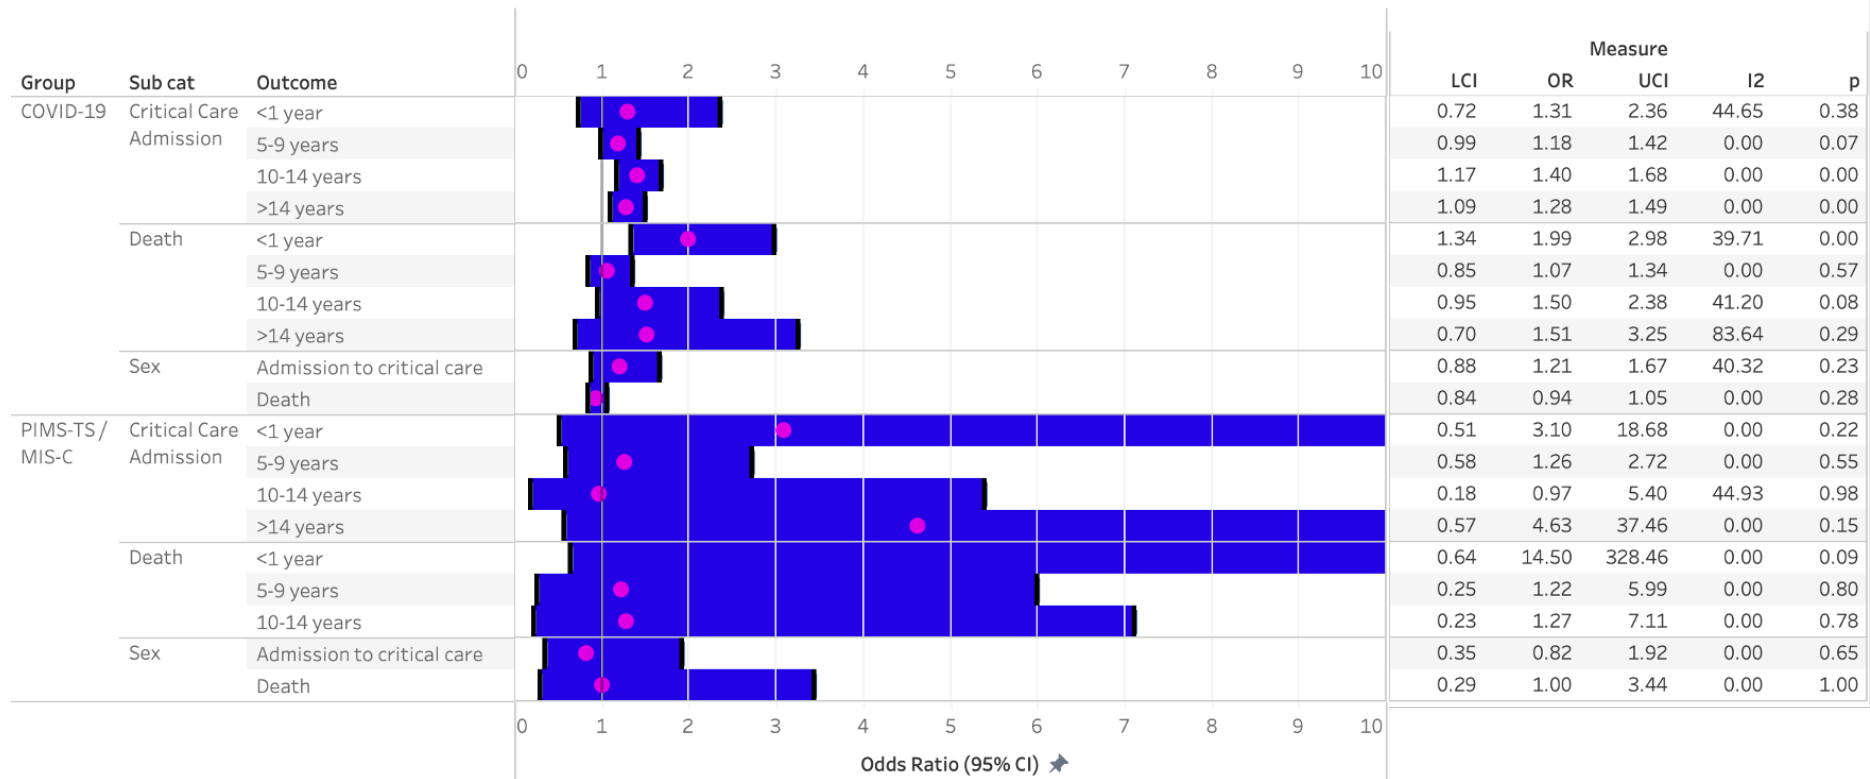

Supplementary Figure 3. Meta-analysis of demographics of individual patient data.

### Meta-analysis of studies providing IPD - Association between co-morbidities and severe outcome

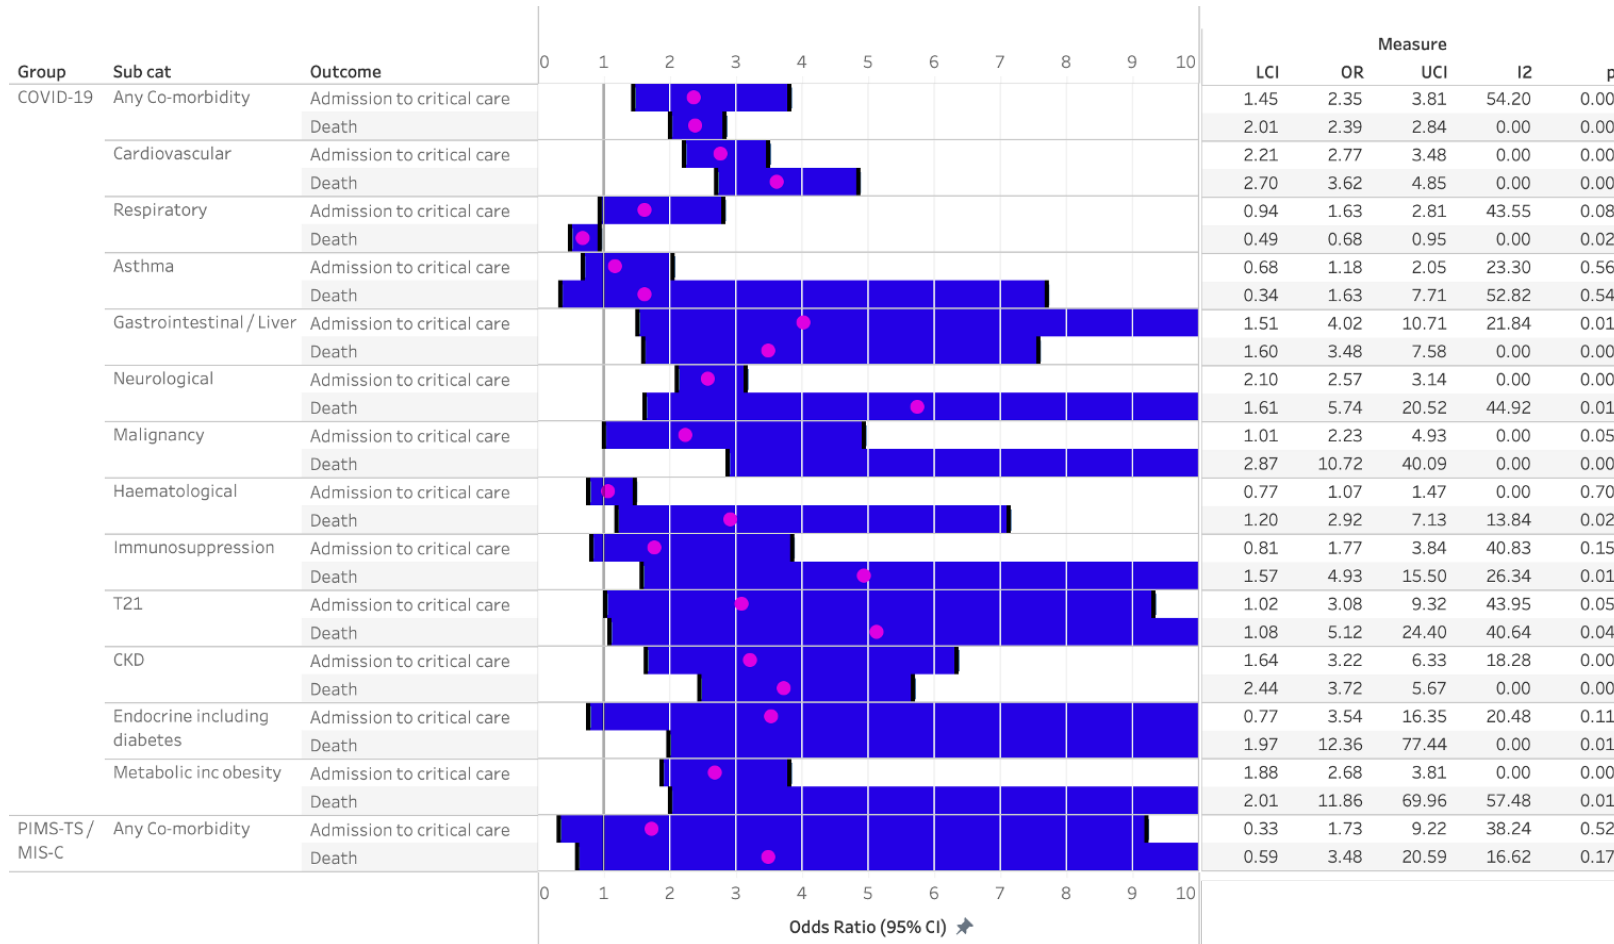

Supplementary Figure 4. Meta-analysis of co-morbidities of individual patient data.

Supplementary Table 1. Summary of all studies included in aggregated meta-analysis including outcomes of mechanical invasive ventilation and cardiovascular support

| Name                          | Events<br>1 | Total 1 | Events<br>2 | Total 2 | Effect<br>Estimate | CI Start | CI End | Weight | P(Q) | I <sup>2</sup> (Q) | Z    | P(Z) |
|-------------------------------|-------------|---------|-------------|---------|--------------------|----------|--------|--------|------|--------------------|------|------|
| <b>Sex and Severe Outcome</b> |             |         |             |         |                    |          |        |        |      |                    |      |      |
| Invasive Ventilation          | 605         | 6384    | 500         | 6043    | 1.17               | 0.94     | 1.46   | 100.00 | 0.31 | 10.70              | 1.41 | 0.16 |
| COVID-19                      | 556         | 6233    | 465         | 5948    | 1.24               | 0.92     | 1.66   | 86.15  | 0.14 | 30.00              | 1.43 | 0.15 |
| 12 - OY Antunez-Montes et al  | 2           | 110     | 1           | 71      | 1.30               | 0.12     | 14.57  | 0.81   |      |                    |      |      |
| 13 - AR Araujo da Silva et al | 3           | 34      | 1           | 15      | 1.35               | 0.13     | 14.20  | 0.86   |      |                    |      |      |
| 142 - S Richardson et al      | 8           | 51      | 6           | 59      | 1.64               | 0.53     | 5.10   | 3.49   |      |                    |      |      |
| 151 - B Sousa et al           | 404         | 3591    | 351         | 3341    | 1.08               | 0.93     | 1.26   | 38.87  |      |                    |      |      |
| 155 - Kyung Sung              | 0           | 54      | 0           | 47      | 0.00               | 0.00     | 0.00   | 0.00   |      |                    |      |      |
| 15 - JP Armann et al          | 3           | 45      | 3           | 57      | 1.29               | 0.25     | 6.70   | 1.71   |      |                    |      |      |
| 174 - P Zachariah et al       | 4           | 27      | 5           | 23      | 0.63               | 0.15     | 2.68   | 2.18   |      |                    |      |      |
| 21 - D Bayesheva et al        | 1           | 311     | 0           | 241     | 2.33               | 0.09     | 57.53  | 0.47   |      |                    |      |      |
| 221 - Preston et al           | 100         | 1083    | 72          | 1344    | 1.80               | 1.31     | 2.46   | 24.14  |      |                    |      |      |
| 28 - H Cairoli                | 1           | 315     | 0           | 263     | 2.51               | 0.10     | 61.96  | 0.47   |      |                    |      |      |
| 46 - M Ceano-Vivas et al      | 1           | 22      | 0           | 11      | 1.60               | 0.06     | 42.63  | 0.44   |      |                    |      |      |
| 54 - A Desai et al            | 10          | 156     | 18          | 137     | 0.45               | 0.20     | 1.02   | 6.37   |      |                    |      |      |
| 75 - V Giacomet et al         | 1           | 82      | 0           | 44      | 1.64               | 0.07     | 41.05  | 0.46   |      |                    |      |      |
| 79 - F Gotzinger et al        | 18          | 311     | 7           | 271     | 2.32               | 0.95     | 5.63   | 5.42   |      |                    |      |      |
| 9 - M Alharbi et al           | 0           | 41      | 1           | 24      | 0.19               | 0.01     | 4.82   | 0.46   |      |                    |      |      |
| PIMS-TS/MIS-C                 | 49          | 151     | 35          | 95      | 0.80               | 0.46     | 1.41   | 13.85  | 0.73 | 0.00               | 0.75 | 0.45 |
| 10 - Z Almoussa et al         | 1           | 5       | 0           | 5       | 3.67               | 0.12     | 113.73 | 0.41   |      |                    |      |      |
| 12 - OY Antunez-Montes et al  | 15          | 43      | 9           | 24      | 0.89               | 0.32     | 2.52   | 4.10   |      |                    |      |      |
| 13 - AR Araujo da Silva et al | 1           | 5       | 1           | 9       | 2.00               | 0.10     | 41.00  | 0.52   |      |                    |      |      |
| 143 - M Riollano-Cruz et al   | 3           | 11      | 0           | 4       | 3.71               | 0.15     | 88.75  | 0.47   |      |                    |      |      |
| 147 - L Shahbaznejad et al    | 2           | 6       | 1           | 4       | 1.50               | 0.09     | 25.39  | 0.60   |      |                    |      |      |
| 167 - E Whittaker et al       | 15          | 38      | 10          | 20      | 0.65               | 0.22     | 1.94   | 3.73   |      |                    |      |      |
| 179 - J Pang et al            | 3           | 3       | 1           | 2       | 7.00               | 0.17     | 291.34 | 0.34   |      |                    |      |      |
| 183 - Rekhtman et al          | 2           | 13      | 3           | 6       | 0.18               | 0.02     | 1.64   | 0.98   |      |                    |      |      |

| Name                             | Events |         | Events |         | Effect   |          |        | Weight | P(Q) | I <sup>2</sup> (Q) | Z    | P(Z) |
|----------------------------------|--------|---------|--------|---------|----------|----------|--------|--------|------|--------------------|------|------|
|                                  | 1      | Total 1 | 2      | Total 2 | Estimate | CI Start | CI End |        |      |                    |      |      |
| 187 - R Carbajal et al           | 0      | 2       | 3      | 5       | 0.14     | 0.00     | 4.47   | 0.40   |      |                    |      |      |
| 244- Luna-Munoz                  | 2      | 7       | 1      | 3       | 0.80     | 0.04     | 14.64  | 0.5    |      |                    |      |      |
| 228 - Hasan et al                | 1      | 5       | 0      | 2       | 1.67     | 0.05     | 58.28  | 0.38   |      |                    |      |      |
| 41 - RL Crawford et al           | 0      | 5       | 0      | 0       | 0.00     | 0.00     | 0.00   | 0.00   |      |                    |      |      |
| 89 - S Jain et al                | 3      | 11      | 6      | 12      | 0.38     | 0.07     | 2.14   | 1.54   |      |                    |      |      |
| 9 - M Alharbi et al              | 3      | 4       | 1      | 2       | 3.00     | 0.08     | 107.45 | 0.37   |      |                    |      |      |
| Need for inotropes/ECMO          | 69     | 1009    | 54     | 828     | 0.82     | 0.47     | 1.46   | 100.00 | 0.26 | 17.85              | 0.66 | 0.51 |
| COVID-19                         | 20     | 895     | 13     | 756     | 1.32     | 0.66     | 2.64   | 45.65  | 0.80 | 0.00               | 0.77 | 0.44 |
| 12 - OY Antunez-Montes et al     | 1      | 110     | 0      | 71      | 1.96     | 0.08     | 48.76  | 2.95   |      |                    |      |      |
| 142 - S Richardson et al         | 0      | 51      | 0      | 59      | 0.00     | 0.00     | 0.00   | 0.00   |      |                    |      |      |
| 15 - JP Armann et al             | 5      | 45      | 3      | 57      | 2.25     | 0.51     | 9.97   | 11.16  |      |                    |      |      |
| 28 - H Cairoli                   | 1      | 315     | 0      | 263     | 2.51     | 0.10     | 61.96  | 2.97   |      |                    |      |      |
| 46 - M Ceano-Vivas et al         | 1      | 22      | 0      | 11      | 1.60     | 0.06     | 42.63  | 2.84   |      |                    |      |      |
| 79 - F Gotzinger et al           | 11     | 311     | 8      | 271     | 1.21     | 0.48     | 3.04   | 20.90  |      |                    |      |      |
| 9 - M Alharbi et al              | 1      | 41      | 2      | 24      | 0.28     | 0.02     | 3.21   | 4.83   |      |                    |      |      |
| PIMS-TS/MIS-C                    | 49     | 114     | 41     | 72      | 0.53     | 0.21     | 1.35   | 54.35  | 0.15 | 36.60              | 1.33 | 0.18 |
| 10 - Z Almoussa et al            | 2      | 5       | 3      | 5       | 0.44     | 0.04     | 5.58   | 4.58   |      |                    |      |      |
| 12 - OY Antunez-Montes et al     | 16     | 43      | 7      | 24      | 1.44     | 0.49     | 4.22   | 17.52  |      |                    |      |      |
| 147 - L Shahbaznejad et al       | 2      | 6       | 2      | 4       | 0.50     | 0.04     | 6.68   | 4.39   |      |                    |      |      |
| 167 - E Whittaker et al          | 14     | 38      | 13     | 20      | 0.31     | 0.10     | 0.97   | 16.44  |      |                    |      |      |
| 187 - R Carbajal et al           | 0      | 2       | 5      | 5       | 0.02     | 0.00     | 1.21   | 1.78   |      |                    |      |      |
| 41 - RL Crawford et al           | 5      | 5       | 0      | 0       | 0.00     | 0.00     | 0.00   | 0.00   |      |                    |      |      |
| 89 - S Jain et al                | 6      | 11      | 10     | 12      | 0.24     | 0.03     | 1.65   | 7.37   |      |                    |      |      |
| 9 - M Alharbi et al              | 4      | 4       | 1      | 2       | 9.00     | 0.22     | 362.48 | 2.27   |      |                    |      |      |
| Admission to Critical Care / ICU | 2088   | 7878    | 1745   | 7300    | 1.19     | 0.99     | 1.44   | 100.00 | 0.00 | 44.79              | 1.81 | 0.07 |
| COVID-19                         | 1622   | 7121    | 1401   | 6716    | 1.19     | 0.93     | 1.52   | 77.12  | 0.00 | 58.55              | 1.41 | 0.16 |
| 122 - A Moreira et al            | 63     | 206     | 42     | 239     | 2.07     | 1.32     | 3.23   | 8.54   |      |                    |      |      |
| 12 - OY Antunez-Montes et al     | 8      | 110     | 3      | 71      | 1.78     | 0.46     | 6.94   | 1.75   |      |                    |      |      |
| 136 - G Qian et al               | 5      | 86      | 2      | 39      | 1.14     | 0.21     | 6.16   | 1.18   |      |                    |      |      |
| 13 - AR Araujo da Silva et al    | 15     | 34      | 11     | 15      | 0.29     | 0.08     | 1.09   | 1.82   |      |                    |      |      |

| Name                          | Events |         | Events |         | Effect Estimate | CI Start | CI End | Weight | P(Q) | I <sup>2</sup> (Q) | Z    | P(Z) |
|-------------------------------|--------|---------|--------|---------|-----------------|----------|--------|--------|------|--------------------|------|------|
|                               | 1      | Total 1 | 2      | Total 2 |                 |          |        |        |      |                    |      |      |
| 142 - S Richardson et al      | 8      | 51      | 6      | 59      | 1.64            | 0.53     | 5.10   | 2.41   |      |                    |      |      |
| 151 - B Sousa et al           | 981    | 3591    | 885    | 3341    | 1.04            | 0.94     | 1.16   | 15.28  |      |                    |      |      |
| 155 - Kyung Sung              | 0      | 54      | 0      | 47      | 0.00            | 0.00     | 0.00   | 0.00   |      |                    |      |      |
| 157 - O Swann et al           | 49     | 326     | 29     | 253     | 1.37            | 0.84     | 2.23   | 7.76   |      |                    |      |      |
| 15 - JP Armann et al          | 5      | 45      | 10     | 57      | 0.59            | 0.19     | 1.86   | 2.33   |      |                    |      |      |
| 21 - D Bayesheva et al        | 0      | 311     | 4      | 241     | 0.08            | 0.00     | 1.58   | 0.41   |      |                    |      |      |
| 221 - Preston et al           | 402    | 1083    | 345    | 1344    | 1.71            | 1.44     | 2.03   | 14.15  |      |                    |      |      |
| 224 - Graff et al             | 6      | 39      | 5      | 27      | 0.80            | 0.22     | 2.95   | 1.89   |      |                    |      |      |
| 26 - CE Bolaños-Almeida et al | 8      | 317     | 9      | 283     | 0.79            | 0.30     | 2.07   | 3.13   |      |                    |      |      |
| 28 - H Cairoli                | 3      | 315     | 0      | 263     | 5.90            | 0.30     | 114.79 | 0.40   |      |                    |      |      |
| 32 - J Chao et al             | 8      | 31      | 5      | 15      | 0.70            | 0.18     | 2.66   | 1.79   |      |                    |      |      |
| 46 - M Ceano-Vivas et al      | 3      | 22      | 2      | 11      | 0.71            | 0.10     | 5.03   | 0.90   |      |                    |      |      |
| 67 - G Fisler et al           | 13     | 33      | 17     | 40      | 0.88            | 0.34     | 2.25   | 3.28   |      |                    |      |      |
| 75 - V Giacomet et al         | 5      | 82      | 3      | 44      | 0.89            | 0.20     | 3.90   | 1.50   |      |                    |      |      |
| 79 - F Gotzinger et al        | 33     | 311     | 15     | 271     | 2.03            | 1.08     | 3.82   | 5.79   |      |                    |      |      |
| 91 - M Kainth et al           | 4      | 33      | 5      | 32      | 0.74            | 0.18     | 3.07   | 1.63   |      |                    |      |      |
| 9 - M Alharbi et al           | 3      | 41      | 3      | 24      | 0.55            | 0.10     | 2.99   | 1.18   |      |                    |      |      |
| PIMS-TS/MIS-C                 | 466    | 757     | 344    | 584     | 1.15            | 0.92     | 1.43   | 22.88  | 0.69 | 0.00               | 1.19 | 0.23 |
| 10 - Z Almoussa et al         | 5      | 5       | 4      | 5       | 3.67            | 0.12     | 113.73 | 0.30   |      |                    |      |      |
| 12 - OY Antunez-Montes et al  | 17     | 43      | 11     | 24      | 0.77            | 0.28     | 2.12   | 2.92   |      |                    |      |      |
| 13 - AR Araujo da Silva et al | 5      | 5       | 7      | 9       | 3.67            | 0.15     | 92.65  | 0.34   |      |                    |      |      |
| 147 - L Shahbaznejad et al    | 5      | 6       | 4      | 4       | 0.41            | 0.01     | 12.64  | 0.30   |      |                    |      |      |
| 160 - JP Torres et al         | 9      | 14      | 5      | 13      | 2.88            | 0.60     | 13.75  | 1.36   |      |                    |      |      |
| 167 - E Whittaker et al       | 25     | 38      | 13     | 20      | 1.04            | 0.33     | 3.23   | 2.39   |      |                    |      |      |
| 183 - Rekhtman et al          | 8      | 13      | 4      | 6       | 0.80            | 0.10     | 6.10   | 0.83   |      |                    |      |      |
| 187 - R Carbajal et al        | 2      | 2       | 5      | 5       | 0.00            | 0.00     | 0.00   | 0.00   |      |                    |      |      |
| 226 - Abrams et al            | 372    | 602     | 275    | 476     | 1.18            | 0.93     | 1.51   | 12.67  |      |                    |      |      |
| 228 - Hasan et al             | 2      | 5       | 0      | 2       | 3.57            | 0.11     | 111.71 | 0.30   |      |                    |      |      |
| 41 - RL Crawford et al        | 4      | 5       | 0      | 0       | 0.00            | 0.00     | 0.00   | 0.00   |      |                    |      |      |
| 5 - N Abdel-Haq et al         | 8      | 15      | 14     | 18      | 0.33            | 0.07     | 1.47   | 1.46   |      |                    |      |      |



| Name                                                       | Events |         | Events |         | Effect Estimate | CI Start | CI End | Weight | P(Q) | I <sup>2</sup> (Q) | Z    | P(Z) |
|------------------------------------------------------------|--------|---------|--------|---------|-----------------|----------|--------|--------|------|--------------------|------|------|
|                                                            | 1      | Total 1 | 2      | Total 2 |                 |          |        |        |      |                    |      |      |
| 9 - M Alharbi et al<br>Received Pharmacological<br>Therapy | 4      | 4       | 2      | 2       | 0.00            | 0.00     | 0.00   | 0.00   |      |                    |      |      |
| COVID-19                                                   | 161    | 640     | 109    | 498     | 0.71            | 0.44     | 1.15   | 100.00 | 0.82 | 0.00               | 1.40 | 0.16 |
| 12 - OY Antunez-Montes et al                               | 57     | 526     | 38     | 417     | 0.73            | 0.42     | 1.27   | 77.48  | 0.63 | 0.00               | 1.12 | 0.26 |
| 13 - AR Araujo da Silva et al                              | 11     | 110     | 5      | 71      | 0.68            | 0.23     | 2.05   | 19.05  |      |                    |      |      |
| 15 - JP Armann et al                                       | 22     | 34      | 6      | 15      | 0.36            | 0.10     | 1.27   | 14.81  |      |                    |      |      |
| 28 - H Cairoli                                             | 20     | 45      | 26     | 57      | 1.05            | 0.48     | 2.30   | 37.47  |      |                    |      |      |
| 46 - M Ceano-Vivas et al                                   | 2      | 315     | 0      | 263     | 0.24            | 0.01     | 4.98   | 2.50   |      |                    |      |      |
| PIMS-TS/MIS-C                                              | 2      | 22      | 1      | 11      | 1.00            | 0.08     | 12.40  | 3.65   |      |                    |      |      |
| 10 - Z Almoussa et al                                      | 104    | 114     | 71     | 81      | 0.63            | 0.23     | 1.74   | 22.52  | 0.63 | 0.00               | 0.89 | 0.37 |
| 12 - OY Antunez-Montes et al                               | 5      | 5       | 5      | 5       | 0.00            | 0.00     | 0.00   | 0.00   |      |                    |      |      |
| 13 - AR Araujo da Silva et al                              | 42     | 43      | 23     | 24      | 0.55            | 0.03     | 9.17   | 2.91   |      |                    |      |      |
| 147 - L Shahbaznejad et al                                 | 5      | 5       | 6      | 9       | 0.17            | 0.01     | 4.03   | 2.30   |      |                    |      |      |
| 167 - E Whittaker et al                                    | 6      | 6       | 4      | 4       | 0.00            | 0.00     | 0.00   | 0.00   |      |                    |      |      |
| 187 - R Carbajal et al                                     | 30     | 38      | 14     | 20      | 0.62            | 0.18     | 2.14   | 15.19  |      |                    |      |      |
| 89 - S Jain et al                                          | 2      | 2       | 5      | 5       | 0.00            | 0.00     | 0.00   | 0.00   |      |                    |      |      |
| 9 - M Alharbi et al<br>Death                               | 10     | 11      | 12     | 12      | 3.57            | 0.13     | 97.23  | 2.12   |      |                    |      |      |
| COVID-19                                                   | 4      | 4       | 2      | 2       | 0.00            | 0.00     | 0.00   | 0.00   |      |                    |      |      |
| 122 - A Moreira et al                                      | 620    | 10921   | 651    | 10491   | 0.94            | 0.84     | 1.05   | 100.00 | 0.99 | 0.00               | 1.08 | 0.28 |
| 12 - OY Antunez-Montes et al                               | 610    | 10758   | 647    | 10387   | 0.94            | 0.83     | 1.05   | 99.00  | 0.98 | 0.00               | 1.09 | 0.27 |
| 13 - AR Araujo da Silva et al                              | 4      | 206     | 8      | 239     | 0.57            | 0.17     | 1.93   | 0.90   |      |                    |      |      |
| 142 - S Richardson et al                                   | 0      | 11      | 0      | 5       | 0.00            | 0.00     | 0.00   | 0.00   |      |                    |      |      |
| 151 - B Sousa et al                                        | 1      | 34      | 0      | 15      | 1.39            | 0.05     | 36.04  | 0.13   |      |                    |      |      |
| 155 - Kyung Sung                                           | 0      | 51      | 1      | 59      | 0.38            | 0.02     | 9.50   | 0.13   |      |                    |      |      |
| 15 - JP Armann et al                                       | 286    | 3591    | 278    | 3341    | 0.95            | 0.80     | 1.13   | 44.75  |      |                    |      |      |
| 19 - S Bellino et al                                       | 0      | 54      | 0      | 47      | 0.00            | 0.00     | 0.00   | 0.00   |      |                    |      |      |
| 21 - D Bayesheva et al                                     | 0      | 45      | 1      | 57      | 0.41            | 0.02     | 10.40  | 0.13   |      |                    |      |      |
| 26 - CE Bolaños-Almeida et al                              | 1      | 1970    | 2      | 1866    | 0.47            | 0.04     | 5.22   | 0.23   |      |                    |      |      |
|                                                            | 0      | 311     | 0      | 241     | 0.00            | 0.00     | 0.00   | 0.00   |      |                    |      |      |
|                                                            | 2      | 317     | 3      | 283     | 0.59            | 0.10     | 3.57   | 0.41   |      |                    |      |      |

| Name                          | Events |         | Events |         | Effect Estimate | CI Start | CI End | Weight | P(Q) | I <sup>2</sup> (Q) | Z    | P(Z) |
|-------------------------------|--------|---------|--------|---------|-----------------|----------|--------|--------|------|--------------------|------|------|
|                               | 1      | Total 1 | 2      | Total 2 |                 |          |        |        |      |                    |      |      |
| 28 - H Cairoli                | 1      | 315     | 1      | 263     | 0.83            | 0.05     | 13.40  | 0.17   |      |                    |      |      |
| 46 - M Ceano-Vivas et al      | 1      | 22      | 0      | 11      | 1.60            | 0.06     | 42.63  | 0.12   |      |                    |      |      |
| 75 - V Giacomet et al         | 0      | 82      | 0      | 44      | 0.00            | 0.00     | 0.00   | 0.00   |      |                    |      |      |
| 79 - F Gotzinger et al        | 3      | 311     | 1      | 271     | 2.63            | 0.27     | 25.43  | 0.26   |      |                    |      |      |
| 86 - D Hillesheim et al       | 311    | 3383    | 350    | 3604    | 0.94            | 0.80     | 1.11   | 51.53  |      |                    |      |      |
| 92 - R Marcello et al         | 0      | 14      | 1      | 17      | 0.38            | 0.01     | 10.05  | 0.12   |      |                    |      |      |
| 9 - M Alharbi et al           | 0      | 41      | 1      | 24      | 0.19            | 0.01     | 4.82   | 0.13   |      |                    |      |      |
| PIMS-TS/MIS-C                 | 10     | 163     | 4      | 104     | 1.07            | 0.34     | 3.38   | 1.00   | 0.72 | 0.00               | 0.11 | 0.91 |
| 10 - Z Almoussa et al         | 1      | 5       | 1      | 5       | 1.00            | 0.05     | 22.18  | 0.14   |      |                    |      |      |
| 12 - OY Antunez-Montes et al  | 4      | 43      | 0      | 24      | 5.58            | 0.29     | 108.26 | 0.15   |      |                    |      |      |
| 13 - AR Araujo da Silva et al | 0      | 5       | 0      | 9       | 0.00            | 0.00     | 0.00   | 0.00   |      |                    |      |      |
| 143 - M Riollano-Cruz et al   | 1      | 11      | 0      | 4       | 1.29            | 0.04     | 37.98  | 0.12   |      |                    |      |      |
| 147 - L Shahbaznejad et al    | 2      | 6       | 0      | 4       | 5.00            | 0.18     | 136.32 | 0.12   |      |                    |      |      |
| 167 - E Whittaker et al       | 1      | 38      | 0      | 20      | 1.64            | 0.06     | 42.11  | 0.13   |      |                    |      |      |
| 183 - Rekhtman et al          | 0      | 13      | 1      | 6       | 0.14            | 0.00     | 3.87   | 0.12   |      |                    |      |      |
| 187 - R Carbajal et al        | 0      | 2       | 0      | 5       | 0.00            | 0.00     | 0.00   | 0.00   |      |                    |      |      |
| 29 - C Capone et al           | 0      | 20      | 0      | 13      | 0.00            | 0.00     | 0.00   | 0.00   |      |                    |      |      |
| 41 - RL Crawford et al        | 0      | 5       | 0      | 0       | 0.00            | 0.00     | 0.00   | 0.00   |      |                    |      |      |
| 89 - S Jain et al             | 0      | 11      | 1      | 12      | 0.33            | 0.01     | 9.07   | 0.12   |      |                    |      |      |
| 9 - M Alharbi et al           | 1      | 4       | 1      | 2       | 0.33            | 0.01     | 11.94  | 0.10   |      |                    |      |      |
| Any co-morbidity              |        |         |        |         |                 |          |        |        |      |                    |      |      |
| Invasive Ventilation          | 370    | 2623    | 514    | 7068    | 2.29            | 1.36     | 3.86   | 100.00 | 0.10 | 31.20              | 3.10 | 0.00 |
| COVID-19                      | 355    | 2580    | 466    | 6931    | 2.73            | 1.62     | 4.62   | 74.09  | 0.22 | 22.87              | 3.76 | 0.00 |
| 12 - OY Antunez-Montes et al  | 0      | 60      | 3      | 121     | 0.28            | 0.01     | 5.51   | 2.77   |      |                    |      |      |
| 13 - AR Araujo da Silva et al | 4      | 31      | 0      | 19      | 6.38            | 0.32     | 125.49 | 2.77   |      |                    |      |      |
| 142 - S Richardson et al      | 2      | 14      | 12     | 96      | 1.17            | 0.23     | 5.86   | 7.52   |      |                    |      |      |
| 151 - B Sousa et al           | 318    | 1957    | 437    | 4979    | 2.02            | 1.73     | 2.35   | 25.78  |      |                    |      |      |
| 155 - Kyung Sung              | 0      | 5       | 0      | 96      | 0.00            | 0.00     | 0.00   | 0.00   |      |                    |      |      |
| 15 - JP Armann et al          | 6      | 33      | 0      | 69      | 32.85           | 1.79     | 603.18 | 2.89   |      |                    |      |      |
| 170 - B Yayla et al           | 0      | 5       | 1      | 72      | 4.33            | 0.16     | 119.39 | 2.28   |      |                    |      |      |

| Name                          | Events |         | Events |         | Effect   |          |        | Weight | P(Q) | I <sup>2</sup> (Q) | Z    | P(Z) |
|-------------------------------|--------|---------|--------|---------|----------|----------|--------|--------|------|--------------------|------|------|
|                               | 1      | Total 1 | 2      | Total 2 | Estimate | CI Start | CI End |        |      |                    |      |      |
| 174 - P Zachariah et al       | 8      | 33      | 1      | 17      | 5.12     | 0.58     | 44.91  | 4.77   |      |                    |      |      |
| 21 - D Bayesheva et al        | 0      | 62      | 1      | 490     | 2.61     | 0.11     | 64.78  | 2.42   |      |                    |      |      |
| 28 - H Cairoli                | 1      | 191     | 0      | 387     | 6.10     | 0.25     | 150.50 | 2.43   |      |                    |      |      |
| 75 - V Giacomet et al         | 0      | 20      | 1      | 107     | 1.73     | 0.07     | 44.01  | 2.38   |      |                    |      |      |
| 79 - F Gotzinger et al        | 16     | 145     | 9      | 437     | 5.90     | 2.55     | 13.66  | 15.72  |      |                    |      |      |
| 9 - M Alharbi et al           | 0      | 24      | 1      | 41      | 0.55     | 0.02     | 14.07  | 2.38   |      |                    |      |      |
| PIMS-TS/MIS-C                 | 15     | 43      | 48     | 137     | 0.83     | 0.22     | 3.09   | 25.91  | 0.06 | 51.03              | 0.28 | 0.78 |
| 10 - Z Almourssa et al        | 0      | 4       | 1      | 6       | 0.41     | 0.01     | 12.64  | 2.14   |      |                    |      |      |
| 12 - OY Antunez-Montes et al  | 11     | 17      | 13     | 50      | 5.22     | 1.61     | 16.96  | 11.30  |      |                    |      |      |
| 13 - AR Araujo da Silva et al | 0      | 5       | 2      | 9       | 0.27     | 0.01     | 6.89   | 2.39   |      |                    |      |      |
| 143 - M Riollano-Cruz et al   | 1      | 5       | 2      | 10      | 1.00     | 0.07     | 14.64  | 3.33   |      |                    |      |      |
| 167 - E Whittaker et al       | 0      | 6       | 25     | 52      | 0.08     | 0.00     | 1.55   | 2.86   |      |                    |      |      |
| 179 - J Pang et al            | 1      | 2       | 3      | 3       | 0.14     | 0.00     | 5.95   | 1.84   |      |                    |      |      |
| 244 - Luna-Munoz et al        | 0      | 1       | 3      | 9       | 0.62     | 0.02     | 19.5   | 2.00   |      |                    |      |      |
| 41 - RL Crawford et al        | 0      | 2       | 0      | 3       | 0.00     | 0.00     | 0.00   | 0.00   |      |                    |      |      |
| 9 - M Alharbi et al           | 2      | 2       | 2      | 4       | 5.00     | 0.15     | 166.59 | 2.06   |      |                    |      |      |
| Cardiovascular support        | 29     | 338     | 23     | 753     | 4.50     | 2.13     | 9.51   | 100.00 | 0.91 | 0.00               | 3.93 | 0.00 |
| COVID-19                      | 9      | 313     | 6      | 690     | 4.07     | 1.43     | 11.53  | 51.65  | 0.68 | 0.00               | 2.64 | 0.01 |
| 12 - OY Antunez-Montes et al  | 0      | 60      | 1      | 121     | 0.66     | 0.03     | 16.54  | 5.43   |      |                    |      |      |
| 15 - JP Armann et al          | 5      | 33      | 3      | 69      | 3.93     | 0.88     | 17.57  | 25.01  |      |                    |      |      |
| 170 - B Yayla et al           | 1      | 5       | 1      | 72      | 17.75    | 0.93     | 338.84 | 6.45   |      |                    |      |      |
| 28 - H Cairoli                | 1      | 191     | 0      | 387     | 6.10     | 0.25     | 150.50 | 5.46   |      |                    |      |      |
| 9 - M Alharbi et al           | 2      | 24      | 1      | 41      | 3.64     | 0.31     | 42.40  | 9.30   |      |                    |      |      |
| PIMS-TS/MIS-C                 | 20     | 25      | 17     | 63      | 5.01     | 1.71     | 14.71  | 48.35  | 0.84 | 0.00               | 2.93 | 0.00 |
| 10 - Z Almourssa et al        | 5      | 4       | 0      | 6       | 0.00     | 0.00     | 0.00   | 0.00   |      |                    |      |      |
| 12 - OY Antunez-Montes et al  | 11     | 17      | 12     | 50      | 5.81     | 1.77     | 19.04  | 39.78  |      |                    |      |      |
| 41 - RL Crawford et al        | 2      | 2       | 2      | 3       | 3.00     | 0.08     | 115.34 | 4.21   |      |                    |      |      |
| 9 - M Alharbi et al           | 2      | 2       | 3      | 4       | 2.14     | 0.06     | 77.54  | 4.36   |      |                    |      |      |
| Admission to Critical Care    | 1485   | 4570    | 1474   | 8158    | 2.55     | 1.79     | 3.64   | 100.00 | 0.00 | 70.28              | 5.14 | 0.00 |
| COVID-19                      | 1444   | 4516    | 1434   | 8070    | 2.56     | 1.77     | 3.71   | 86.92  | 0.00 | 74.20              | 5.01 | 0.00 |

| Name                          | Events |         | Events |         | Effect   |          |        | Weight | P(Q) | I <sup>2</sup> (Q) | Z    | P(Z) |
|-------------------------------|--------|---------|--------|---------|----------|----------|--------|--------|------|--------------------|------|------|
|                               | 1      | Total 1 | 2      | Total 2 | Estimate | CI Start | CI End |        |      |                    |      |      |
| 12 - OY Antunez-Montes et al  | 2      | 60      | 9      | 121     | 0.43     | 0.09     | 2.05   | 3.80   |      |                    |      |      |
| 13 - AR Araujo da Silva et al | 18     | 31      | 8      | 19      | 1.90     | 0.60     | 6.05   | 5.68   |      |                    |      |      |
| 142 - S Richardson et al      | 7      | 14      | 30     | 96      | 2.20     | 0.71     | 6.83   | 5.82   |      |                    |      |      |
| 151 - B Sousa et al           | 673    | 1957    | 1194   | 4979    | 1.66     | 1.48     | 1.86   | 13.91  |      |                    |      |      |
| 155 - Kyung Sung              | 0      | 5       | 0      | 96      | 0.00     | 0.00     | 0.00   | 0.00   |      |                    |      |      |
| 157 - O Swann et al           | 53     | 258     | 25     | 322     | 3.07     | 1.85     | 5.10   | 10.97  |      |                    |      |      |
| 15 - JP Armann et al          | 10     | 33      | 5      | 69      | 5.57     | 1.72     | 18.01  | 5.58   |      |                    |      |      |
| 163 - S Verma et al           | 16     | 38      | 7      | 44      | 3.84     | 1.37     | 10.80  | 6.46   |      |                    |      |      |
| 170 - B Yayla et al           | 0      | 5       | 1      | 72      | 4.33     | 0.16     | 119.39 | 1.07   |      |                    |      |      |
| 21 - D Bayesheva et al        | 0      | 62      | 4      | 490     | 0.86     | 0.05     | 16.26  | 1.34   |      |                    |      |      |
| 221 - Preston et al           | 630    | 1659    | 117    | 771     | 3.42     | 2.75     | 4.27   | 13.39  |      |                    |      |      |
| 28 - H Cairoli                | 3      | 191     | 0      | 387     | 14.39    | 0.74     | 280.01 | 1.31   |      |                    |      |      |
| 46 - M Ceano-Vivas et al      | 1      | 14      | 4      | 19      | 0.29     | 0.03     | 2.92   | 2.03   |      |                    |      |      |
| 75 - V Giacomet et al         | 2      | 20      | 5      | 107     | 2.27     | 0.41     | 12.59  | 3.31   |      |                    |      |      |
| 79 - F Gotzinger et al        | 24     | 145     | 24     | 437     | 3.41     | 1.87     | 6.23   | 10.07  |      |                    |      |      |
| 9 - M Alharbi et al           | 5      | 24      | 1      | 41      | 10.53    | 1.15     | 96.47  | 2.19   |      |                    |      |      |
| PIMS-TS/MIS-C                 | 41     | 54      | 40     | 88      | 1.93     | 0.41     | 8.97   | 13.08  | 0.03 | 59.89              | 0.83 | 0.40 |
| 10 - Z Almoussa et al         | 4      | 4       | 5      | 6       | 2.45     | 0.08     | 76.13  | 1.00   |      |                    |      |      |
| 12 - OY Antunez-Montes et al  | 12     | 17      | 16     | 50      | 5.10     | 1.54     | 16.94  | 5.43   |      |                    |      |      |
| 13 - AR Araujo da Silva et al | 5      | 9       | 7      | 9       | 0.36     | 0.05     | 2.77   | 2.49   |      |                    |      |      |
| 41 - RL Crawford et al        | 2      | 3       | 2      | 3       | 1.00     | 0.03     | 29.81  | 1.02   |      |                    |      |      |
| 5 - N Abdel-Haq et al         | 16     | 17      | 6      | 16      | 26.67    | 2.78     | 255.46 | 2.12   |      |                    |      |      |
| 9 - M Alharbi et al           | 2      | 4       | 4      | 4       | 0.11     | 0.00     | 3.35   | 1.02   |      |                    |      |      |
| Death                         | 284    | 3045    | 312    | 10873   | 3.22     | 1.87     | 5.54   | 100.00 | 0.34 | 9.76               | 4.23 | 0.00 |
| COVID-19                      | 278    | 3004    | 308    | 10739   | 4.16     | 1.97     | 8.80   | 85.40  | 0.23 | 22.11              | 3.46 | 0.00 |
| 12 - OY Antunez-Montes et al  | 1      | 60      | 0      | 121     | 6.13     | 0.25     | 152.65 | 2.71   |      |                    |      |      |
| 13 - AR Araujo da Silva et al | 1      | 31      | 0      | 19      | 1.92     | 0.07     | 49.50  | 2.65   |      |                    |      |      |
| 151 - B Sousa et al           | 261    | 1957    | 303    | 4979    | 2.37     | 1.99     | 2.83   | 54.62  |      |                    |      |      |
| 155 - Kyung Sung              | 0      | 5       | 0      | 96      | 0.00     | 0.00     | 0.00   | 0.00   |      |                    |      |      |
| 157 - O Swann et al           | 6      | 276     | 0      | 375     | 18.05    | 1.01     | 321.70 | 3.33   |      |                    |      |      |

| Name                          | Events |         | Events |         | Effect   |          |         | Weight | P(Q) | I <sup>2</sup> (Q) | Z    | P(Z) |
|-------------------------------|--------|---------|--------|---------|----------|----------|---------|--------|------|--------------------|------|------|
|                               | 1      | Total 1 | 2      | Total 2 | Estimate | CI Start | CI End  |        |      |                    |      |      |
| 15 - JP Armann et al          | 1      | 33      | 0      | 69      | 6.42     | 0.25     | 161.79  | 2.69   |      |                    |      |      |
| 170 - B Yayla et al           | 0      | 5       | 1      | 72      | 4.33     | 0.16     | 119.39  | 2.55   |      |                    |      |      |
| 19 - S Bellino et al          | 4      | 206     | 0      | 3630    | 161.36   | 8.66     | 3007.24 | 3.24   |      |                    |      |      |
| 21 - D Bayesheva et al        | 0      | 62      | 0      | 490     | 0.00     | 0.00     | 0.00    | 0.00   |      |                    |      |      |
| 239 - Qian et al              | 1      | 8       | 1      | 119     | 16.86    | 0.95     | 298.73  | 3.7    |      |                    |      |      |
| 28 - H Cairoli                | 2      | 191     | 0      | 387     | 10.22    | 0.49     | 214.03  | 3.01   |      |                    |      |      |
| 79 - F Gotzinger et al        | 2      | 145     | 2      | 437     | 3.04     | 0.42     | 21.79   | 6.70   |      |                    |      |      |
| 92 - R Marcello et al         | 0      | 9       | 1      | 23      | 0.79     | 0.03     | 21.18   | 2.59   |      |                    |      |      |
| 9 - M Alharbi et al           | 0      | 24      | 1      | 41      | 0.55     | 0.02     | 14.07   | 2.67   |      |                    |      |      |
| PIMS-TS/MIS-C                 | 6      | 41      | 4      | 134     | 3.36     | 0.79     | 14.40   | 13.24  | 0.46 | 0.00               | 1.64 | 0.10 |
| 10 - Z Almoussa et al         | 1      | 4       | 1      | 6       | 1.67     | 0.07     | 37.73   | 2.87   |      |                    |      |      |
| 12 - OY Antunez-Montes et al  | 4      | 17      | 0      | 50      | 33.67    | 1.71     | 664.69  | 3.12   |      |                    |      |      |
| 13 - AR Araujo da Silva et al | 0      | 5       | 0      | 9       | 0.00     | 0.00     | 0.00    | 0.00   |      |                    |      |      |
| 143 - M Riollano-Cruz et al   | 0      | 5       | 1      | 10      | 0.58     | 0.02     | 16.72   | 2.48   |      |                    |      |      |
| 167 - E Whittaker et al       | 0      | 6       | 1      | 52      | 2.64     | 0.10     | 71.82   | 2.57   |      |                    |      |      |
| 41 - RL Crawford et al        | 0      | 2       | 0      | 3       | 0.00     | 0.00     | 0.00    | 0.00   |      |                    |      |      |
| 9 - M Alharbi et al           | 1      | 2       | 1      | 4       | 3.00     | 0.08     | 107.45  | 2.21   |      |                    |      |      |
| Cardiovascular co-morbidity   |        |         |        |         |          |          |         |        |      |                    |      |      |
| Invasive Ventilation          | 87     | 373     | 737    | 9021    | 6.20     | 2.85     | 13.49   | 100.00 | 0.04 | 48.12              | 4.61 | 0.00 |
| COVID-19                      | 87     | 372     | 735    | 9008    | 6.74     | 2.97     | 15.29   | 95.76  | 0.02 | 52.83              | 4.56 | 0.00 |
| 13 - AR Araujo da Silva et al | 1      | 2       | 3      | 48      | 15.00    | 0.74     | 303.74  | 5.41   |      |                    |      |      |
| 142 - S Richardson et al      | 1      | 2       | 13     | 108     | 7.31     | 0.43     | 124.05  | 5.96   |      |                    |      |      |
| 151 - B Sousa et al           | 66     | 273     | 689    | 6663    | 2.76     | 2.07     | 3.69    | 27.56  |      |                    |      |      |
| 15 - JP Armann et al          | 1      | 9       | 5      | 93      | 2.20     | 0.23     | 21.20   | 8.33   |      |                    |      |      |
| 174 - P Zachariah et al       | 1      | 4       | 8      | 46      | 1.58     | 0.15     | 17.25   | 7.73   |      |                    |      |      |
| 21 - D Bayesheva et al        | 0      | 7       | 1      | 545     | 24.20    | 0.91     | 643.60  | 4.69   |      |                    |      |      |
| 28 - H Cairoli                | 0      | 4       | 1      | 574     | 42.48    | 1.52     | 1189.60 | 4.57   |      |                    |      |      |
| 54 - A Desai et al            | 14     | 41      | 14     | 252     | 8.81     | 3.80     | 20.44   | 21.44  |      |                    |      |      |
| 75 - V Giacomet et al         | 0      | 5       | 1      | 122     | 7.36     | 0.27     | 202.20  | 4.61   |      |                    |      |      |
| 79 - F Gotzinger et al        | 3      | 25      | 0      | 557     | 173.44   | 8.70     | 3459.45 | 5.45   |      |                    |      |      |

| Name                          | Events |         | Events |         | Effect Estimate | CI Start | CI End  | Weight | P(Q) | I <sup>2</sup> (Q) | Z    | P(Z) |
|-------------------------------|--------|---------|--------|---------|-----------------|----------|---------|--------|------|--------------------|------|------|
|                               | 1      | Total 1 | 2      | Total 2 |                 |          |         |        |      |                    |      |      |
| PIMS-TS/MIS-C                 | 0      | 1       | 2      | 13      | 1.53            | 0.05     | 49.80   | 4.24   | 1.00 | 0.00               | 0.24 | 0.81 |
| 13 - AR Araujo da Silva et al | 0      | 1       | 2      | 13      | 1.53            | 0.05     | 49.80   | 4.24   |      |                    |      |      |
| Cardiovascular support        | 6      | 46      | 30     | 1291    | 5.21            | 2.05     | 13.23   | 100.00 | 0.63 | 0.00               | 3.47 | 0.00 |
| COVID-19                      | 6      | 46      | 25     | 1281    | 5.21            | 2.05     | 13.23   | 100.00 | 0.63 | 0.00               | 3.47 | 0.00 |
| 15 - JP Armann et al          | 2      | 9       | 6      | 93      | 4.14            | 0.70     | 24.47   | 27.54  |      |                    |      |      |
| 28 - H Cairoli                | 0      | 4       | 1      | 574     | 42.48           | 1.52     | 1189.60 | 7.82   |      |                    |      |      |
| 79 - F Gotzinger et al        | 3      | 25      | 16     | 557     | 4.61            | 1.25     | 17.00   | 51.03  |      |                    |      |      |
| 9 - M Alharbi et al           | 1      | 8       | 2      | 57      | 3.93            | 0.31     | 49.12   | 13.61  |      |                    |      |      |
| PIMS-TS/MIS-C                 | 0      | 0       | 5      | 10      | 0.00            | 0.00     | 0.00    | 0.00   | 0.00 | 0.00               | 0.00 | 0.00 |
| 10 - Z Almousa et al          | 0      | 0       | 5      | 10      | 0.00            | 0.00     | 0.00    | 0.00   |      |                    |      |      |
| Admission to critical care    | 166    | 385     | 2020   | 9708    | 2.87            | 2.32     | 3.55    | 100.00 | 0.55 | 0.00               | 9.66 | 0.00 |
| COVID-19                      | 165    | 384     | 2009   | 9695    | 2.88            | 2.33     | 3.57    | 99.62  | 0.53 | 0.00               | 9.69 | 0.00 |
| 136 - G Qian et al            | 2      | 3       | 5      | 124     | 47.60           | 3.67     | 616.85  | 0.70   |      |                    |      |      |
| 13 - AR Araujo da Silva et al | 1      | 2       | 25     | 48      | 0.92            | 0.05     | 15.58   | 0.57   |      |                    |      |      |
| 142 - S Richardson et al      | 2      | 2       | 35     | 108     | 10.35           | 0.48     | 221.38  | 0.49   |      |                    |      |      |
| 151 - B Sousa et al           | 129    | 273     | 1738   | 6663    | 2.54            | 1.99     | 3.24    | 76.92  |      |                    |      |      |
| 157 - O Swann et al           | 12     | 36      | 66     | 544     | 3.62            | 1.73     | 7.58    | 8.37   |      |                    |      |      |
| 15 - JP Armann et al          | 4      | 9       | 11     | 93      | 5.96            | 1.39     | 25.62   | 2.15   |      |                    |      |      |
| 163 - S Verma et al           | 1      | 1       | 22     | 81      | 7.93            | 0.31     | 201.99  | 0.44   |      |                    |      |      |
| 21 - D Bayesheva et al        | 0      | 7       | 4      | 545     | 8.02            | 0.40     | 162.64  | 0.50   |      |                    |      |      |
| 28 - H Cairoli                | 0      | 4       | 3      | 574     | 18.14           | 0.81     | 404.74  | 0.47   |      |                    |      |      |
| 32 - J Chao et al             | 1      | 1       | 12     | 45      | 8.04            | 0.31     | 210.67  | 0.43   |      |                    |      |      |
| 67 - G Fisler et al           | 3      | 5       | 27     | 72      | 2.50            | 0.39     | 15.93   | 1.33   |      |                    |      |      |
| 75 - V Giacomet et al         | 1      | 5       | 7      | 122     | 4.11            | 0.40     | 41.81   | 0.85   |      |                    |      |      |
| 79 - F Gotzinger et al        | 5      | 25      | 43     | 557     | 2.99            | 1.07     | 8.36    | 4.33   |      |                    |      |      |
| 91 - M Kainth et al           | 1      | 3       | 8      | 62      | 3.38            | 0.27     | 41.64   | 0.72   |      |                    |      |      |
| 9 - M Alharbi et al           | 3      | 8       | 3      | 57      | 10.80           | 1.71     | 68.28   | 1.34   |      |                    |      |      |
| PIMS-TS/MIS-C                 | 1      | 1       | 11     | 13      | 0.65            | 0.02     | 21.18   | 0.38   | 1.00 | 0.00               | 0.24 | 0.81 |
| 13 - AR Araujo da Silva et al | 1      | 1       | 11     | 13      | 0.65            | 0.02     | 21.18   | 0.38   |      |                    |      |      |
| Death                         | 65     | 344     | 513    | 12479   | 11.33           | 2.60     | 49.33   | 100.00 | 0.00 | 69.24              | 3.23 | 0.00 |

| Name                          | Events |         | Events |         | Effect   |          |         | Weight | P(Q) | I <sup>2</sup> (Q) | Z    | P(Z) |
|-------------------------------|--------|---------|--------|---------|----------|----------|---------|--------|------|--------------------|------|------|
|                               | 1      | Total 1 | 2      | Total 2 | Estimate | CI Start | CI End  |        |      |                    |      |      |
| COVID-19                      | 65     | 342     | 512    | 12436   | 12.05    | 2.37     | 61.34   | 90.58  | 0.00 | 73.55              | 3.00 | 0.00 |
| 13 - AR Araujo da Silva et al | 0      | 2       | 1      | 48      | 6.33     | 0.20     | 198.32  | 9.88   |      |                    |      |      |
| 142 - S Richardson et al      | 0      | 2       | 0      | 108     | 0.00     | 0.00     | 0.00    | 0.00   |      |                    |      |      |
| 151 - B Sousa et al           | 61     | 273     | 503    | 6663    | 3.52     | 2.61     | 4.75    | 21.34  |      |                    |      |      |
| 15 - JP Armann et al          | 0      | 9       | 1      | 93      | 3.25     | 0.12     | 85.36   | 10.44  |      |                    |      |      |
| 19 - S Bellino et al          | 3      | 17      | 1      | 3819    | 818.14   | 80.14    | 8351.99 | 14.01  |      |                    |      |      |
| 21 - D Bayesheva et al        | 0      | 7       | 0      | 545     | 0.00     | 0.00     | 0.00    | 0.00   |      |                    |      |      |
| 28 - H Cairoli                | 0      | 4       | 2      | 574     | 25.44    | 1.06     | 608.73  | 10.75  |      |                    |      |      |
| 79 - F Gotzinger et al        | 1      | 25      | 3      | 557     | 7.69     | 0.77     | 76.73   | 14.11  |      |                    |      |      |
| 92 - R Marcello et al         | 0      | 3       | 1      | 29      | 2.71     | 0.09     | 80.33   | 10.06  |      |                    |      |      |
| PIMS-TS/MIS-C                 | 0      | 2       | 1      | 43      | 6.56     | 0.18     | 239.09  | 9.42   | 1.00 | 0.00               | 1.02 | 0.31 |
| 121 - C Moraleda et al        | 0      | 1       | 1      | 30      | 6.56     | 0.18     | 239.09  | 9.42   |      |                    |      |      |
| 13 - AR Araujo da Silva et al | 0      | 1       | 0      | 13      | 0.00     | 0.00     | 0.00    | 0.00   |      |                    |      |      |
| Respiratory Co-morbidity      |        |         |        |         |          |          |         |        |      |                    |      |      |
| Invasive Ventilation          | 108    | 997     | 769    | 7923    | 2.15     | 1.02     | 4.53    | 100.00 | 0.00 | 60.18              | 2.01 | 0.04 |
| COVID-19                      | 105    | 987     | 738    | 7841    | 2.61     | 1.12     | 6.07    | 83.00  | 0.00 | 68.78              | 2.23 | 0.03 |
| 13 - AR Araujo da Silva et al | 1      | 8       | 3      | 42      | 1.86     | 0.17     | 20.51   | 6.30   |      |                    |      |      |
| 142 - S Richardson et al      | 1      | 10      | 13     | 100     | 0.74     | 0.09     | 6.36    | 7.25   |      |                    |      |      |
| 151 - B Sousa et al           | 70     | 692     | 685    | 6244    | 0.91     | 0.70     | 1.18    | 17.82  |      |                    |      |      |
| 15 - JP Armann et al          | 2      | 11      | 4      | 91      | 4.83     | 0.77     | 30.16   | 8.68   |      |                    |      |      |
| 174 - P Zachariah et al       | 2      | 8       | 7      | 42      | 1.67     | 0.28     | 10.03   | 8.86   |      |                    |      |      |
| 28 - H Cairoli                | 0      | 66      | 1      | 512     | 2.56     | 0.10     | 63.58   | 4.16   |      |                    |      |      |
| 54 - A Desai et al            | 24     | 162     | 4      | 131     | 5.52     | 1.86     | 16.35   | 13.14  |      |                    |      |      |
| 75 - V Giacomet et al         | 0      | 1       | 1      | 126     | 27.89    | 0.78     | 1003.14 | 3.50   |      |                    |      |      |
| 79 - F Gotzinger et al        | 5      | 29      | 20     | 553     | 5.55     | 1.92     | 16.06   | 13.30  |      |                    |      |      |
| PIMS-TS/MIS-C                 | 3      | 10      | 31     | 82      | 0.80     | 0.11     | 5.64    | 17.00  | 0.21 | 33.12              | 0.23 | 0.82 |
| 13 - AR Araujo da Silva et al | 0      | 1       | 2      | 13      | 1.53     | 0.05     | 49.80   | 3.66   |      |                    |      |      |
| 143 - M Riollano-Cruz et al   | 0      | 4       | 3      | 11      | 0.27     | 0.01     | 6.46    | 4.23   |      |                    |      |      |
| 167 - E Whittaker et al       | 3      | 4       | 22     | 54      | 4.36     | 0.43     | 44.73   | 6.56   |      |                    |      |      |
| 179 - J Pang et al            | 0      | 1       | 4      | 4       | 0.04     | 0.00     | 2.82    | 2.54   |      |                    |      |      |

| Name                          | Events |         | Events |         | Effect   |          |        | Weight | P(Q) | I <sup>2</sup> (Q) | Z    | P(Z) |
|-------------------------------|--------|---------|--------|---------|----------|----------|--------|--------|------|--------------------|------|------|
|                               | 1      | Total 1 | 2      | Total 2 | Estimate | CI Start | CI End |        |      |                    |      |      |
| Cardiovascular Support        | 8      | 110     | 52     | 1220    | 3.52     | 1.42     | 8.75   | 100.00 | 0.99 | 0.00               | 2.71 | 0.01 |
| COVID-19                      | 5      | 106     | 23     | 1156    | 3.48     | 1.30     | 9.36   | 84.70  | 0.96 | 0.00               | 2.47 | 0.01 |
| 15 - JP Armann et al          | 2      | 11      | 6      | 91      | 3.15     | 0.55     | 17.96  | 27.28  |      |                    |      |      |
| 28 - H Cairoli                | 0      | 66      | 1      | 512     | 2.56     | 0.10     | 63.58  | 8.03   |      |                    |      |      |
| 79 - F Gotzinger et al        | 3      | 29      | 16     | 553     | 3.87     | 1.06     | 14.13  | 49.39  |      |                    |      |      |
| PIMS-TS/MIS-C                 | 3      | 4       | 29     | 64      | 3.75     | 0.37     | 38.39  | 15.30  | 1.00 | 0.00               | 1.11 | 0.27 |
| 10 - Z Almoussa et al         | 0      | 0       | 5      | 10      | 0.00     | 0.00     | 0.00   | 0.00   |      |                    |      |      |
| 167 - E Whittaker et al       | 3      | 4       | 24     | 54      | 3.75     | 0.37     | 38.39  | 15.30  |      |                    |      |      |
| Admission to Critical Care    | 252    | 939     | 1982   | 8567    | 2.06     | 1.30     | 3.27   | 100.00 | 0.01 | 52.16              | 3.08 | 0.00 |
| COVID-19                      | 238    | 924     | 1930   | 8477    | 1.98     | 1.23     | 3.19   | 93.09  | 0.01 | 56.05              | 2.82 | 0.00 |
| 13 - AR Araujo da Silva et al | 7      | 8       | 19     | 42      | 8.47     | 0.96     | 75.08  | 3.53   |      |                    |      |      |
| 142 - S Richardson et al      | 3      | 10      | 34     | 100     | 0.83     | 0.20     | 3.42   | 6.54   |      |                    |      |      |
| 151 - B Sousa et al           | 182    | 692     | 1685   | 6244    | 0.97     | 0.81     | 1.15   | 16.65  |      |                    |      |      |
| 157 - O Swann et al           | 10     | 30      | 68     | 550     | 3.54     | 1.59     | 7.89   | 11.26  |      |                    |      |      |
| 15 - JP Armann et al          | 3      | 11      | 12     | 91      | 2.47     | 0.57     | 10.62  | 6.29   |      |                    |      |      |
| 163 - S Verma et al           | 8      | 16      | 15     | 66      | 3.40     | 1.09     | 10.59  | 8.37   |      |                    |      |      |
| 224 - Graff et al             | 6      | 21      | 5      | 45      | 3.20     | 0.85     | 12.06  | 7.06   |      |                    |      |      |
| 28 - H Cairoli                | 0      | 66      | 3      | 512     | 1.09     | 0.06     | 21.42  | 2.10   |      |                    |      |      |
| 32 - J Chao et al             | 3      | 11      | 10     | 35      | 0.94     | 0.21     | 4.27   | 5.99   |      |                    |      |      |
| 67 - G Fislser et al          | 8      | 16      | 22     | 61      | 1.77     | 0.58     | 5.38   | 8.56   |      |                    |      |      |
| 75 - V Giacomet et al         | 0      | 1       | 8      | 126     | 4.65     | 0.18     | 122.93 | 1.77   |      |                    |      |      |
| 79 - F Gotzinger et al        | 6      | 29      | 42     | 553     | 3.17     | 1.23     | 8.22   | 9.87   |      |                    |      |      |
| 91 - M Kainth et al           | 2      | 13      | 7      | 52      | 1.17     | 0.21     | 6.42   | 5.11   |      |                    |      |      |
| PIMS-TS/MIS-C                 | 14     | 15      | 52     | 90      | 3.50     | 0.58     | 21.00  | 6.91   | 0.30 | 16.37              | 1.37 | 0.17 |
| 13 - AR Araujo da Silva et al | 1      | 1       | 11     | 13      | 0.65     | 0.02     | 21.18  | 1.59   |      |                    |      |      |
| 167 - E Whittaker et al       | 3      | 4       | 29     | 54      | 2.59     | 0.25     | 26.46  | 3.19   |      |                    |      |      |
| 5 - N Abdel-Haq et al         | 10     | 10      | 12     | 23      | 19.32    | 1.01     | 368.35 | 2.13   |      |                    |      |      |
| Death                         | 41     | 865     | 540    | 8263    | 1.49     | 0.64     | 3.52   | 100.00 | 0.20 | 27.57              | 0.92 | 0.36 |
| COVID-19                      | 41     | 856     | 538    | 8185    | 1.70     | 0.59     | 4.90   | 89.44  | 0.10 | 43.07              | 0.98 | 0.33 |
| 13 - AR Araujo da Silva et al | 0      | 8       | 1      | 42      | 1.63     | 0.06     | 43.45  | 5.90   |      |                    |      |      |



| Name                          | Events |         | Events |         | Effect   |          |         | Weight | P(Q) | I <sup>2</sup> (Q) | Z    | P(Z) |
|-------------------------------|--------|---------|--------|---------|----------|----------|---------|--------|------|--------------------|------|------|
|                               | 1      | Total 1 | 2      | Total 2 | Estimate | CI Start | CI End  |        |      |                    |      |      |
| 142 - S Richardson et al      | 0      | 10      | 0      | 100     | 0.00     | 0.00     | 0.00    | 0.00   |      |                    |      |      |
| 151 - B Sousa et al           | 39     | 692     | 525    | 6244    | 0.65     | 0.47     | 0.91    | 42.16  |      |                    |      |      |
| 157 - O Swann et al           | 2      | 35      | 4      | 616     | 9.27     | 1.64     | 52.47   | 15.82  |      |                    |      |      |
| 15 - JP Armann et al          | 0      | 11      | 1      | 91      | 2.62     | 0.10     | 68.26   | 5.98   |      |                    |      |      |
| 28 - H Cairoli                | 0      | 66      | 2      | 512     | 1.54     | 0.07     | 32.33   | 6.71   |      |                    |      |      |
| 79 - F Gotzinger et al        | 0      | 29      | 4      | 553     | 2.07     | 0.11     | 39.35   | 7.11   |      |                    |      |      |
| 92 - R Marcello et al         | 0      | 5       | 1      | 27      | 1.61     | 0.06     | 44.86   | 5.76   |      |                    |      |      |
| PIMS-TS/MIS-C                 | 0      | 9       | 2      | 78      | 1.41     | 0.12     | 16.70   | 10.56  | 0.61 | 0.00               | 0.27 | 0.79 |
| 13 - AR Araujo da Silva et al | 0      | 1       | 1      | 13      | 2.78     | 0.07     | 103.83  | 4.97   |      |                    |      |      |
| 143 - M Riollano-Cruz et al   | 0      | 4       | 1      | 11      | 0.78     | 0.03     | 22.98   | 5.59   |      |                    |      |      |
| 167 - E Whittaker et al       | 0      | 4       | 0      | 54      | 0.00     | 0.00     | 0.00    | 0.00   |      |                    |      |      |
| Asthma                        |        |         |        |         |          |          |         |        |      |                    |      |      |
| Invasive Ventilation          | 52     | 649     | 795    | 8430    | 1.45     | 0.73     | 2.92    | 100.00 | 0.11 | 35.48              | 1.06 | 0.29 |
| COVID-19                      | 49     | 641     | 770    | 8365    | 1.46     | 0.69     | 3.08    | 88.76  | 0.11 | 38.59              | 0.99 | 0.32 |
| 13 - AR Araujo da Silva et al | 0      | 7       | 4      | 43      | 0.59     | 0.03     | 12.04   | 4.57   |      |                    |      |      |
| 142 - S Richardson et al      | 1      | 10      | 13     | 100     | 0.74     | 0.09     | 6.36    | 7.98   |      |                    |      |      |
| 151 - B Sousa et al           | 41     | 528     | 714    | 6408    | 0.67     | 0.48     | 0.93    | 30.93  |      |                    |      |      |
| 155 - Kyung Sung              | 0      | 1       | 0      | 100     | 0.00     | 0.00     | 0.00    | 0.00   |      |                    |      |      |
| 15 - JP Armann et al          | 1      | 5       | 5      | 97      | 4.60     | 0.43     | 49.16   | 6.85   |      |                    |      |      |
| 170 - B Yayla et al           | 0      | 1       | 1      | 76      | 16.78    | 0.47     | 605.19  | 3.38   |      |                    |      |      |
| 174 - P Zachariah et al       | 2      | 6       | 7      | 44      | 2.64     | 0.40     | 17.32   | 9.70   |      |                    |      |      |
| 28 - H Cairoli                | 0      | 39      | 1      | 539     | 4.54     | 0.18     | 113.38  | 4.10   |      |                    |      |      |
| 54 - A Desai et al            | 4      | 37      | 24     | 256     | 1.17     | 0.38     | 3.59    | 17.86  |      |                    |      |      |
| 75 - V Giacomet et al         | 0      | 1       | 1      | 126     | 27.89    | 0.78     | 1003.14 | 3.39   |      |                    |      |      |
| 79 - F Gotzinger et al        | 0      | 6       | 0      | 576     | 0.00     | 0.00     | 0.00    | 0.00   |      |                    |      |      |
| PIMS-TS/MIS-C                 | 3      | 8       | 25     | 65      | 1.35     | 0.09     | 20.17   | 11.24  | 0.16 | 48.35              | 0.22 | 0.83 |
| 143 - M Riollano-Cruz et al   | 0      | 4       | 3      | 11      | 0.27     | 0.01     | 6.46    | 4.19   |      |                    |      |      |
| 167 - E Whittaker et al       | 3      | 4       | 22     | 54      | 4.36     | 0.43     | 44.73   | 7.04   |      |                    |      |      |
| Cardiovascular Support        | 4      | 55      | 51     | 1342    | 3.31     | 0.90     | 12.24   | 100.00 | 0.99 | 0.00               | 1.79 | 0.07 |
| COVID-19                      | 1      | 51      | 27     | 1288    | 3.12     | 0.64     | 15.19   | 68.39  | 0.95 | 0.00               | 1.41 | 0.16 |

| Name                          | Events |         | Events |         | Effect Estimate | CI Start | CI End | Weight | P(Q) | I <sup>2</sup> (Q) | Z    | P(Z) |
|-------------------------------|--------|---------|--------|---------|-----------------|----------|--------|--------|------|--------------------|------|------|
|                               | 1      | Total 1 | 2      | Total 2 |                 |          |        |        |      |                    |      |      |
| 15 - JP Armann et al          | 1      | 5       | 7      | 97      | 3.21            | 0.32     | 32.78  | 31.70  |      |                    |      |      |
| 170 - B Yayla et al           | 0      | 1       | 0      | 76      | 0.00            | 0.00     | 0.00   | 0.00   |      |                    |      |      |
| 28 - H Cairoli                | 0      | 39      | 1      | 539     | 4.54            | 0.18     | 113.38 | 16.52  |      |                    |      |      |
| 79 - F Gotzinger et al        | 0      | 6       | 19     | 576     | 2.20            | 0.12     | 40.44  | 20.17  |      |                    |      |      |
| PIMS-TS/MIS-C                 | 3      | 4       | 24     | 54      | 3.75            | 0.37     | 38.39  | 31.61  | 1.00 | 0.00               | 1.11 | 0.27 |
| 167 - E Whittaker et al       | 3      | 4       | 24     | 54      | 3.75            | 0.37     | 38.39  | 31.61  |      |                    |      |      |
| Admission to Critical Care    | 160    | 661     | 1955   | 8352    | 1.72            | 0.98     | 3.03   | 100.00 | 0.07 | 39.18              | 1.89 | 0.06 |
| COVID-19                      | 147    | 647     | 1914   | 8275    | 1.48            | 0.86     | 2.55   | 92.08  | 0.12 | 33.33              | 1.42 | 0.15 |
| 13 - AR Araujo da Silva et al | 6      | 7       | 20     | 43      | 6.90            | 0.76     | 62.28  | 5.18   |      |                    |      |      |
| 142 - S Richardson et al      | 3      | 10      | 34     | 100     | 0.83            | 0.20     | 3.42   | 9.66   |      |                    |      |      |
| 151 - B Sousa et al           | 123    | 528     | 1744   | 6408    | 0.81            | 0.66     | 1.00   | 23.87  |      |                    |      |      |
| 155 - Kyung Sung              | 0      | 1       | 0      | 100     | 0.00            | 0.00     | 0.00   | 0.00   |      |                    |      |      |
| 15 - JP Armann et al          | 1      | 5       | 14     | 97      | 1.48            | 0.15     | 14.25  | 4.95   |      |                    |      |      |
| 163 - S Verma et al           | 5      | 12      | 18     | 70      | 2.06            | 0.58     | 7.32   | 10.98  |      |                    |      |      |
| 170 - B Yayla et al           | 0      | 1       | 1      | 76      | 16.78           | 0.47     | 605.19 | 2.24   |      |                    |      |      |
| 224 - Graff et al             | 4      | 16      | 7      | 50      | 2.05            | 0.51     | 8.18   | 9.90   |      |                    |      |      |
| 28 - H Cairoli                | 0      | 39      | 3      | 539     | 1.94            | 0.10     | 38.23  | 3.12   |      |                    |      |      |
| 32 - J Chao et al             | 3      | 11      | 10     | 35      | 0.94            | 0.21     | 4.27   | 8.85   |      |                    |      |      |
| 75 - V Giacomet et al         | 0      | 1       | 8      | 126     | 4.65            | 0.18     | 122.93 | 2.64   |      |                    |      |      |
| 79 - F Gotzinger et al        | 2      | 6       | 46     | 576     | 5.76            | 1.03     | 32.30  | 7.45   |      |                    |      |      |
| 91 - M Kainth et al           | 0      | 10      | 9      | 55      | 0.23            | 0.01     | 4.33   | 3.23   |      |                    |      |      |
| PIMS-TS/MIS-C                 | 13     | 14      | 41     | 77      | 5.78            | 0.80     | 41.84  | 7.92   | 0.28 | 13.73              | 1.74 | 0.08 |
| 167 - E Whittaker et al       | 3      | 4       | 29     | 54      | 2.59            | 0.25     | 26.46  | 4.74   |      |                    |      |      |
| 5 - N Abdel-Haq et al         | 10     | 10      | 12     | 23      | 19.32           | 1.01     | 368.35 | 3.18   |      |                    |      |      |
| Death                         | 19     | 614     | 558    | 8058    | 1.83            | 0.62     | 5.41   | 100.00 | 0.09 | 40.19              | 1.09 | 0.28 |
| COVID-19                      | 19     | 602     | 555    | 7966    | 2.16            | 0.52     | 8.90   | 76.80  | 0.04 | 53.62              | 1.06 | 0.29 |
| 13 - AR Araujo da Silva et al | 0      | 7       | 1      | 43      | 1.89            | 0.07     | 50.88  | 7.97   |      |                    |      |      |
| 142 - S Richardson et al      | 0      | 10      | 0      | 100     | 0.00            | 0.00     | 0.00   | 0.00   |      |                    |      |      |
| 151 - B Sousa et al           | 19     | 528     | 545    | 6408    | 0.40            | 0.25     | 0.64   | 28.21  |      |                    |      |      |
| 155 - Kyung Sung              | 0      | 1       | 0      | 100     | 0.00            | 0.00     | 0.00   | 0.00   |      |                    |      |      |

| Name                          | Events |         | Events |         | Effect Estimate | CI Start | CI End | Weight | P(Q) | I <sup>2</sup> (Q) | Z    | P(Z) |
|-------------------------------|--------|---------|--------|---------|-----------------|----------|--------|--------|------|--------------------|------|------|
|                               | 1      | Total 1 | 2      | Total 2 |                 |          |        |        |      |                    |      |      |
| 15 - JP Armann et al          | 0      | 5       | 1      | 97      | 5.85            | 0.21     | 160.79 | 7.89   |      |                    |      |      |
| 170 - B Yayla et al           | 0      | 1       | 1      | 76      | 16.78           | 0.47     | 605.19 | 7.01   |      |                    |      |      |
| 28 - H Cairoli                | 0      | 39      | 2      | 539     | 2.72            | 0.13     | 57.67  | 8.88   |      |                    |      |      |
| 79 - F Gotzinger et al        | 0      | 6       | 4      | 576     | 9.79            | 0.48     | 201.00 | 9.01   |      |                    |      |      |
| 92 - R Marcello et al         | 0      | 5       | 1      | 27      | 1.61            | 0.06     | 44.86  | 7.84   |      |                    |      |      |
| PIMS-TS/MIS-C                 | 0      | 12      | 3      | 92      | 1.84            | 0.26     | 12.77  | 23.20  | 0.79 | 0.00               | 0.61 | 0.54 |
| 121 - C Moraleda et al        | 0      | 4       | 1      | 27      | 1.96            | 0.07     | 56.12  | 7.76   |      |                    |      |      |
| 143 - M Riollano-Cruz et al   | 0      | 4       | 1      | 11      | 0.78            | 0.03     | 22.98  | 7.65   |      |                    |      |      |
| 167 - E Whittaker et al       | 0      | 4       | 1      | 54      | 3.96            | 0.14     | 112.06 | 7.80   |      |                    |      |      |
| Cystic Fibrosis               |        |         |        |         |                 |          |        |        |      |                    |      |      |
| Invasive Ventilation          | 0      | 2       | 25     | 580     | 4.36            | 0.20     | 93.13  | 100.00 | 1.00 | 0.00               | 0.94 | 0.35 |
| COVID-19                      | 0      | 2       | 25     | 580     | 4.36            | 0.20     | 93.13  | 100.00 | 1.00 | 0.00               | 0.94 | 0.35 |
| 79 - F Gotzinger et al        | 0      | 2       | 25     | 580     | 4.36            | 0.20     | 93.13  | 100.00 |      |                    |      |      |
| PIMS-TS/MIS-C                 | 0      | 0       | 0      | 0       | 0.00            | 0.00     | 0.00   | 0.00   | 0.00 | 0.00               | 0.00 | 0.00 |
| Cardiovascular Support        | 0      | 2       | 27     | 682     | 5.76            | 0.27     | 124.03 | 100.00 | 1.00 | 0.00               | 1.12 | 0.26 |
| COVID-19                      | 0      | 2       | 27     | 682     | 5.76            | 0.27     | 124.03 | 100.00 | 1.00 | 0.00               | 1.12 | 0.26 |
| 15 - JP Armann et al          | 0      | 0       | 8      | 102     | 0.00            | 0.00     | 0.00   | 0.00   |      |                    |      |      |
| 79 - F Gotzinger et al        | 0      | 2       | 19     | 580     | 5.76            | 0.27     | 124.03 | 100.00 |      |                    |      |      |
| PIMS-TS/MIS-C                 | 0      | 0       | 0      | 0       | 0.00            | 0.00     | 0.00   | 0.00   | 0.00 | 0.00               | 0.00 | 0.00 |
| Admission to Critical Care    | 0      | 0       | 0      | 0       | 0.00            | 0.00     | 0.00   | 0.00   | 0.00 | 0.00               | 0.00 | 0.00 |
| COVID-19                      | 0      | 0       | 0      | 0       | 0.00            | 0.00     | 0.00   | 0.00   | 0.00 | 0.00               | 0.00 | 0.00 |
| PIMS-TS/MIS-C                 | 0      | 0       | 0      | 0       | 0.00            | 0.00     | 0.00   | 0.00   | 0.00 | 0.00               | 0.00 | 0.00 |
| Death                         | 0      | 2       | 4      | 580     | 25.62           | 1.07     | 612.98 | 100.00 | 1.00 | 0.00               | 2.00 | 0.05 |
| COVID-19                      | 0      | 2       | 4      | 580     | 25.62           | 1.07     | 612.98 | 100.00 | 1.00 | 0.00               | 2.00 | 0.05 |
| 79 - F Gotzinger et al        | 0      | 2       | 4      | 580     | 25.62           | 1.07     | 612.98 | 100.00 |      |                    |      |      |
| PIMS-TS/MIS-C                 | 0      | 0       | 0      | 0       | 0.00            | 0.00     | 0.00   | 0.00   | 0.00 | 0.00               | 0.00 | 0.00 |
| GI co-morbidity               |        |         |        |         |                 |          |        |        |      |                    |      |      |
| Invasive Ventilation          | 8      | 55      | 782    | 8785    | 4.93            | 1.74     | 14.01  | 100.00 | 0.28 | 19.46              | 2.99 | 0.00 |
| COVID-19                      | 7      | 54      | 780    | 8771    | 4.86            | 1.51     | 15.67  | 92.02  | 0.24 | 25.90              | 2.64 | 0.01 |
| 13 - AR Araujo da Silva et al | 0      | 1       | 4      | 49      | 3.37            | 0.12     | 95.48  | 8.55   |      |                    |      |      |

| Name                          | Events |         | Events |         | Effect   |          |         | Weight | P(Q) | I <sup>2</sup> (Q) | Z    | P(Z) |
|-------------------------------|--------|---------|--------|---------|----------|----------|---------|--------|------|--------------------|------|------|
|                               | 1      | Total 1 | 2      | Total 2 | Estimate | CI Start | CI End  |        |      |                    |      |      |
| 151 - B Sousa et al           | 7      | 35      | 748    | 6901    | 2.06     | 0.90     | 4.72    | 48.00  |      |                    |      |      |
| 21 - D Bayesheva et al        | 0      | 1       | 1      | 551     | 122.33   | 3.41     | 4385.74 | 7.58   |      |                    |      |      |
| 28 - H Cairoli                | 0      | 10      | 1      | 568     | 18.02    | 0.69     | 468.51  | 8.94   |      |                    |      |      |
| 75 - V Giacomet et al         | 0      | 4       | 1      | 123     | 9.07     | 0.32     | 255.04  | 8.58   |      |                    |      |      |
| 79 - F Gotzinger et al        | 0      | 3       | 25     | 579     | 3.11     | 0.16     | 61.75   | 10.37  |      |                    |      |      |
| PIMS-TS/MIS-C                 | 1      | 1       | 2      | 14      | 15.00    | 0.46     | 485.32  | 7.98   | 1.00 | 0.00               | 1.53 | 0.13 |
| 143 - M Riollano-Cruz et al   | 1      | 1       | 2      | 14      | 15.00    | 0.46     | 485.32  | 7.98   |      |                    |      |      |
| Cardiovascular Support        | 0      | 13      | 20     | 1147    | 8.09     | 0.89     | 73.42   | 100.00 | 0.50 | 0.00               | 1.86 | 0.06 |
| COVID-19                      | 0      | 13      | 20     | 1147    | 8.09     | 0.89     | 73.42   | 100.00 | 0.50 | 0.00               | 1.86 | 0.06 |
| 28 - H Cairoli                | 0      | 10      | 1      | 568     | 18.02    | 0.69     | 468.51  | 45.84  |      |                    |      |      |
| 79 - F Gotzinger et al        | 0      | 3       | 19     | 579     | 4.11     | 0.20     | 82.26   | 54.16  |      |                    |      |      |
| PIMS-TS/MIS-C                 | 0      | 0       | 0      | 0       | 0.00     | 0.00     | 0.00    | 0.00   | 0.00 | 0.00               | 0.00 | 0.00 |
| Admission to Critical Care    | 29     | 86      | 2022   | 9450    | 3.08     | 1.92     | 4.96    | 100.00 | 0.53 | 0.00               | 4.64 | 0.00 |
| COVID-19                      | 29     | 86      | 2022   | 9450    | 3.08     | 1.92     | 4.96    | 100.00 | 0.53 | 0.00               | 4.64 | 0.00 |
| 13 - AR Araujo da Silva et al | 1      | 1       | 25     | 49      | 2.88     | 0.11     | 74.21   | 2.14   |      |                    |      |      |
| 151 - B Sousa et al           | 15     | 35      | 1852   | 6901    | 2.04     | 1.04     | 4.00    | 50.08  |      |                    |      |      |
| 157 - O Swann et al           | 7      | 18      | 71     | 562     | 4.40     | 1.65     | 11.72   | 23.53  |      |                    |      |      |
| 21 - D Bayesheva et al        | 0      | 1       | 4      | 551     | 40.56    | 1.45     | 1135.72 | 2.03   |      |                    |      |      |
| 224 - Graff et al             | 4      | 13      | 7      | 53      | 2.92     | 0.71     | 12.10   | 11.18  |      |                    |      |      |
| 28 - H Cairoli                | 0      | 10      | 3      | 568     | 7.69     | 0.37     | 158.51  | 2.47   |      |                    |      |      |
| 75 - V Giacomet et al         | 1      | 4       | 7      | 123     | 5.52     | 0.51     | 60.18   | 3.96   |      |                    |      |      |
| 79 - F Gotzinger et al        | 0      | 3       | 48     | 579     | 1.57     | 0.08     | 30.75   | 2.55   |      |                    |      |      |
| 9 - M Alharbi et al           | 1      | 1       | 5      | 64      | 32.45    | 1.18     | 895.61  | 2.05   |      |                    |      |      |
| PIMS-TS/MIS-C                 | 0      | 0       | 0      | 0       | 0.00     | 0.00     | 0.00    | 0.00   | 0.00 | 0.00               | 0.00 | 0.00 |
| Death                         | 7      | 51      | 565    | 8662    | 3.63     | 1.72     | 7.65    | 100.00 | 0.69 | 0.00               | 3.40 | 0.00 |
| COVID-19                      | 7      | 50      | 564    | 8648    | 3.66     | 1.71     | 7.84    | 95.77  | 0.52 | 0.00               | 3.34 | 0.00 |
| 13 - AR Araujo da Silva et al | 0      | 1       | 1      | 49      | 10.78    | 0.30     | 390.30  | 4.30   |      |                    |      |      |
| 151 - B Sousa et al           | 7      | 35      | 557    | 6901    | 2.85     | 1.24     | 6.55    | 79.93  |      |                    |      |      |
| 21 - D Bayesheva et al        | 0      | 1       | 0      | 551     | 0.00     | 0.00     | 0.00    | 0.00   |      |                    |      |      |
| 28 - H Cairoli                | 0      | 10      | 2      | 568     | 10.79    | 0.49     | 238.84  | 5.78   |      |                    |      |      |

| Name                                    | Events |         | Events |         | Effect Estimate | CI Start | CI End  | Weight | P(Q) | I <sup>2</sup> (Q) | Z     | P(Z) |
|-----------------------------------------|--------|---------|--------|---------|-----------------|----------|---------|--------|------|--------------------|-------|------|
|                                         | 1      | Total 1 | 2      | Total 2 |                 |          |         |        |      |                    |       |      |
| 79 - F Gotzinger et al                  | 0      | 3       | 4      | 579     | 18.27           | 0.82     | 407.57  | 5.75   |      |                    |       |      |
| PIMS-TS/MIS-C                           | 0      | 1       | 1      | 14      | 3.00            | 0.08     | 111.78  | 4.23   | 1.00 | 0.00               | 0.60  | 0.55 |
| 143 - M Riollano-Cruz et al             | 0      | 1       | 1      | 14      | 3.00            | 0.08     | 111.78  | 4.23   |      |                    |       |      |
| Neurological/Neuromuscular Co-morbidity |        |         |        |         |                 |          |         |        |      |                    |       |      |
| Invasive Ventilation                    | 145    | 562     | 749    | 9250    | 4.30            | 2.75     | 6.73    | 100.00 | 0.28 | 14.82              | 6.38  | 0.00 |
| COVID-19                                | 141    | 553     | 694    | 9109    | 4.24            | 3.41     | 5.27    | 91.31  | 0.45 | 0.00               | 13.00 | 0.00 |
| 12 - OY Antunez-Montes et al            | 0      | 9       | 3      | 172     | 2.55            | 0.12     | 52.99   | 2.08   |      |                    |       |      |
| 13 - AR Araujo da Silva et al           | 2      | 14      | 2      | 36      | 2.83            | 0.36     | 22.40   | 4.27   |      |                    |       |      |
| 151 - B Sousa et al                     | 112    | 372     | 643    | 6564    | 3.97            | 3.13     | 5.02    | 41.54  |      |                    |       |      |
| 155 - Kyung Sung                        | 0      | 1       | 0      | 100     | 0.00            | 0.00     | 0.00    | 0.00   |      |                    |       |      |
| 15 - JP Armann et al                    | 2      | 6       | 4      | 96      | 11.50           | 1.60     | 82.51   | 4.65   |      |                    |       |      |
| 170 - B Yayla et al                     | 0      | 2       | 1      | 75      | 9.93            | 0.32     | 309.72  | 1.64   |      |                    |       |      |
| 174 - P Zachariah et al                 | 1      | 7       | 8      | 43      | 0.73            | 0.08     | 6.93    | 3.65   |      |                    |       |      |
| 21 - D Bayesheva et al                  | 0      | 9       | 1      | 543     | 19.04           | 0.73     | 497.97  | 1.81   |      |                    |       |      |
| 28 - H Cairoli                          | 0      | 26      | 1      | 552     | 6.94            | 0.28     | 174.36  | 1.85   |      |                    |       |      |
| 46 - M Ceano-Vivas et al                | 1      | 2       | 0      | 31      | 63.00           | 1.73     | 2295.08 | 1.50   |      |                    |       |      |
| 54 - A Desai et al                      | 20     | 77      | 8      | 216     | 9.12            | 3.82     | 21.79   | 16.92  |      |                    |       |      |
| 75 - V Giacomet et al                   | 0      | 2       | 1      | 125     | 16.60           | 0.53     | 516.03  | 1.64   |      |                    |       |      |
| 79 - F Gotzinger et al                  | 3      | 26      | 22     | 556     | 3.17            | 0.88     | 11.35   | 9.75   |      |                    |       |      |
| PIMS-TS/MIS-C                           | 4      | 9       | 55     | 141     | 0.99            | 0.22     | 4.48    | 8.69   | 0.39 | 2.80               | 0.02  | 0.99 |
| 12 - OY Antunez-Montes et al            | 2      | 2       | 22     | 65      | 9.67            | 0.44     | 210.06  | 2.03   |      |                    |       |      |
| 13 - AR Araujo da Silva et al           | 0      | 2       | 2      | 12      | 0.84            | 0.03     | 23.58   | 1.74   |      |                    |       |      |
| 167 - E Whittaker et al                 | 0      | 2       | 25     | 56      | 0.25            | 0.01     | 5.38    | 2.02   |      |                    |       |      |
| 179 - J Pang et al                      | 1      | 2       | 3      | 3       | 0.14            | 0.00     | 5.95    | 1.40   |      |                    |       |      |
| 9 - M Alharbi et al                     | 1      | 1       | 3      | 5       | 2.14            | 0.06     | 77.54   | 1.51   |      |                    |       |      |
| Cardiovascular Support                  | 7      | 81      | 81     | 1668    | 3.61            | 1.35     | 9.64    | 100.00 | 0.58 | 0.00               | 2.56  | 0.01 |
| COVID-19                                | 3      | 76      | 30     | 1542    | 4.31            | 1.32     | 14.13   | 70.62  | 0.40 | 2.63               | 2.41  | 0.02 |
| 12 - OY Antunez-Montes et al            | 0      | 9       | 1      | 172     | 6.02            | 0.23     | 157.79  | 9.05   |      |                    |       |      |
| 15 - JP Armann et al                    | 1      | 6       | 7      | 96      | 2.54            | 0.26     | 24.88   | 18.56  |      |                    |       |      |
| 170 - B Yayla et al                     | 0      | 2       | 0      | 75      | 0.00            | 0.00     | 0.00    | 0.00   |      |                    |       |      |

| Name                          | Events |         | Events |         | Effect   |          |         | Weight | P(Q) | I <sup>2</sup> (Q) | Z     | P(Z) |
|-------------------------------|--------|---------|--------|---------|----------|----------|---------|--------|------|--------------------|-------|------|
|                               | 1      | Total 1 | 2      | Total 2 | Estimate | CI Start | CI End  |        |      |                    |       |      |
| 28 - H Cairoli                | 0      | 26      | 1      | 552     | 6.94     | 0.28     | 174.36  | 9.29   |      |                    |       |      |
| 46 - M Ceano-Vivas et al      | 1      | 2       | 0      | 31      | 63.00    | 1.73     | 2295.08 | 7.47   |      |                    |       |      |
| 79 - F Gotzinger et al        | 0      | 26      | 19     | 556     | 0.52     | 0.03     | 8.85    | 12.02  |      |                    |       |      |
| 9 - M Alharbi et al           | 1      | 5       | 2      | 60      | 7.25     | 0.54     | 98.15   | 14.22  |      |                    |       |      |
| PIMS-TS/MIS-C                 | 4      | 5       | 51     | 126     | 2.38     | 0.39     | 14.61   | 29.38  | 0.51 | 0.00               | 0.94  | 0.35 |
| 12 - OY Antunez-Montes et al  | 2      | 2       | 21     | 65      | 10.35    | 0.48     | 225.10  | 10.18  |      |                    |       |      |
| 167 - E Whittaker et al       | 1      | 2       | 26     | 56      | 1.15     | 0.07     | 19.38   | 12.13  |      |                    |       |      |
| 9 - M Alharbi et al           | 1      | 1       | 4      | 5       | 1.00     | 0.02     | 40.28   | 7.07   |      |                    |       |      |
| Admission to Critical Care    | 223    | 563     | 1967   | 9850    | 2.61     | 2.17     | 3.14    | 100.00 | 0.92 | 0.00               | 10.14 | 0.00 |
| COVID-19                      | 216    | 556     | 1896   | 9712    | 2.60     | 2.16     | 3.13    | 98.97  | 0.84 | 0.00               | 10.05 | 0.00 |
| 12 - OY Antunez-Montes et al  | 0      | 9       | 11     | 172     | 0.74     | 0.04     | 13.51   | 0.41   |      |                    |       |      |
| 136 - G Qian et al            | 0      | 1       | 7      | 126     | 5.31     | 0.20     | 141.79  | 0.32   |      |                    |       |      |
| 13 - AR Araujo da Silva et al | 8      | 14      | 18     | 36      | 1.33     | 0.38     | 4.63    | 2.22   |      |                    |       |      |
| 151 - B Sousa et al           | 171    | 372     | 1696   | 6564    | 2.44     | 1.98     | 3.02    | 76.96  |      |                    |       |      |
| 155 - Kyung Sung              | 0      | 1       | 0      | 100     | 0.00     | 0.00     | 0.00    | 0.00   |      |                    |       |      |
| 157 - O Swann et al           | 17     | 63      | 61     | 517     | 2.76     | 1.49     | 5.12    | 9.02   |      |                    |       |      |
| 15 - JP Armann et al          | 3      | 6       | 12     | 96      | 7.00     | 1.27     | 38.73   | 1.17   |      |                    |       |      |
| 170 - B Yayla et al           | 0      | 2       | 1      | 75      | 9.93     | 0.32     | 309.72  | 0.29   |      |                    |       |      |
| 21 - D Bayesheva et al        | 0      | 9       | 4      | 543     | 6.31     | 0.32     | 125.64  | 0.38   |      |                    |       |      |
| 224 - Graff et al             | 3      | 8       | 8      | 58      | 3.75     | 0.75     | 18.84   | 1.32   |      |                    |       |      |
| 26 - CE Bolaños-Almeida et al | 0      | 26      | 3      | 552     | 2.96     | 0.15     | 58.83   | 0.38   |      |                    |       |      |
| 32 - J Chao et al             | 3      | 4       | 10     | 42      | 9.60     | 0.90     | 102.90  | 0.61   |      |                    |       |      |
| 46 - M Ceano-Vivas et al      | 1      | 2       | 4      | 31      | 6.75     | 0.35     | 130.79  | 0.39   |      |                    |       |      |
| 75 - V Giacomet et al         | 1      | 2       | 7      | 125     | 16.86    | 0.95     | 298.73  | 0.42   |      |                    |       |      |
| 79 - F Gotzinger et al        | 5      | 26      | 43     | 556     | 2.84     | 1.02     | 7.91    | 3.28   |      |                    |       |      |
| 91 - M Kainth et al           | 2      | 6       | 7      | 59      | 3.71     | 0.57     | 24.14   | 0.98   |      |                    |       |      |
| 9 - M Alharbi et al           | 2      | 5       | 4      | 60      | 9.33     | 1.19     | 72.99   | 0.81   |      |                    |       |      |
| PIMS-TS/MIS-C                 | 7      | 7       | 71     | 138     | 3.57     | 0.58     | 22.08   | 1.03   | 0.72 | 0.00               | 1.37  | 0.17 |
| 12 - OY Antunez-Montes et al  | 2      | 2       | 26     | 65      | 7.45     | 0.34     | 161.51  | 0.36   |      |                    |       |      |
| 13 - AR Araujo da Silva et al | 2      | 2       | 10     | 12      | 1.19     | 0.04     | 33.43   | 0.31   |      |                    |       |      |

| Name                          | Events |         | Events |         | Effect   |          |         | Weight | P(Q) | I <sup>2</sup> (Q) | Z    | P(Z) |
|-------------------------------|--------|---------|--------|---------|----------|----------|---------|--------|------|--------------------|------|------|
|                               | 1      | Total 1 | 2      | Total 2 | Estimate | CI Start | CI End  |        |      |                    |      |      |
| 167 - E Whittaker et al       | 2      | 2       | 30     | 56      | 4.34     | 0.20     | 94.59   | 0.36   |      |                    |      |      |
| 9 - M Alharbi et al           | 1      | 1       | 5      | 5       | 0.00     | 0.00     | 0.00    | 0.00   |      |                    |      |      |
| Death                         | 63     | 531     | 524    | 9403    | 2.47     | 1.81     | 3.37    | 100.00 | 0.44 | 0.48               | 5.72 | 0.00 |
| COVID-19                      | 62     | 524     | 518    | 9265    | 4.34     | 2.00     | 9.43    | 97.55  | 0.24 | 23.35              | 3.71 | 0.00 |
| 136 - G Qian et al            | 0      | 1       | 0      | 126     | 0.00     | 0.00     | 0.00    | 0.00   |      |                    |      |      |
| 13 - AR Araujo da Silva et al | 1      | 14      | 0      | 36      | 8.11     | 0.31     | 211.49  | 0.90   |      |                    |      |      |
| 151 - B Sousa et al           | 56     | 372     | 508    | 6564    | 2.11     | 1.57     | 2.85    | 87.95  |      |                    |      |      |
| 155 - Kyung Sung              | 0      | 1       | 0      | 100     | 0.00     | 0.00     | 0.00    | 0.00   |      |                    |      |      |
| 157 - O Swann et al           | 2      | 65      | 4      | 586     | 4.62     | 0.83     | 25.72   | 3.23   |      |                    |      |      |
| 15 - JP Armann et al          | 0      | 6       | 1      | 96      | 4.90     | 0.18     | 132.48  | 0.88   |      |                    |      |      |
| 170 - B Yayla et al           | 0      | 2       | 1      | 75      | 9.93     | 0.32     | 309.72  | 0.81   |      |                    |      |      |
| 21 - D Bayesheva et al        | 0      | 9       | 0      | 543     | 0.00     | 0.00     | 0.00    | 0.00   |      |                    |      |      |
| 28 - H Cairoli                | 1      | 26      | 1      | 552     | 22.04    | 1.34     | 362.67  | 1.22   |      |                    |      |      |
| 46 - M Ceano-Vivas et al      | 1      | 2       | 0      | 31      | 63.00    | 1.73     | 2295.08 | 0.74   |      |                    |      |      |
| 79 - F Gotzinger et al        | 1      | 26      | 3      | 556     | 7.37     | 0.74     | 73.42   | 1.81   |      |                    |      |      |
| PIMS-TS/MIS-C                 | 1      | 7       | 6      | 138     | 5.33     | 0.74     | 38.45   | 2.45   | 0.87 | 0.00               | 1.66 | 0.10 |
| 12 - OY Antunez-Montes et al  | 0      | 2       | 4      | 65      | 2.73     | 0.11     | 65.97   | 0.94   |      |                    |      |      |
| 13 - AR Araujo da Silva et al | 0      | 2       | 0      | 12      | 0.00     | 0.00     | 0.00    | 0.00   |      |                    |      |      |
| 167 - E Whittaker et al       | 0      | 2       | 1      | 56      | 7.40     | 0.24     | 231.32  | 0.81   |      |                    |      |      |
| 9 - M Alharbi et al           | 1      | 1       | 1      | 5       | 9.00     | 0.22     | 362.48  | 0.70   |      |                    |      |      |
| Oncological co-morbidity      |        |         |        |         |          |          |         |        |      |                    |      |      |
| Invasive Ventilation          | 9      | 86      | 58     | 1801    | 2.73     | 1.35     | 5.54    | 100.00 | 0.82 | 0.00               | 2.79 | 0.01 |
| COVID-19                      | 9      | 86      | 58     | 1801    | 2.73     | 1.35     | 5.54    | 100.00 | 0.82 | 0.00               | 2.79 | 0.01 |
| 12 - OY Antunez-Montes et al  | 0      | 7       | 3      | 174     | 3.27     | 0.15     | 69.12   | 5.35   |      |                    |      |      |
| 13 - AR Araujo da Silva et al | 0      | 5       | 4      | 45      | 0.84     | 0.04     | 17.78   | 5.34   |      |                    |      |      |
| 155 - Kyung Sung              | 0      | 3       | 0      | 98      | 0.00     | 0.00     | 0.00    | 0.00   |      |                    |      |      |
| 15 - JP Armann et al          | 1      | 7       | 5      | 95      | 3.00     | 0.30     | 29.94   | 9.41   |      |                    |      |      |
| 28 - H Cairoli                | 0      | 9       | 1      | 569     | 19.95    | 0.76     | 521.81  | 4.67   |      |                    |      |      |
| 54 - A Desai et al            | 5      | 28      | 23     | 265     | 2.29     | 0.79     | 6.59    | 44.54  |      |                    |      |      |
| 79 - F Gotzinger et al        | 3      | 27      | 22     | 555     | 3.03     | 0.85     | 10.82   | 30.70  |      |                    |      |      |

| Name                          | Events |         | Events |         | Effect   |          |         | Weight | P(Q) | I <sup>2</sup> (Q) | Z    | P(Z) |
|-------------------------------|--------|---------|--------|---------|----------|----------|---------|--------|------|--------------------|------|------|
|                               | 1      | Total 1 | 2      | Total 2 | Estimate | CI Start | CI End  |        |      |                    |      |      |
| PIMS-TS/MIS-C                 | 0      | 0       | 0      | 0       | 0.00     | 0.00     | 0.00    | 0.00   | 0.00 | 0.00               | 0.00 | 0.00 |
| Cardiovascular Support        | 3      | 50      | 26     | 1393    | 3.48     | 1.15     | 10.52   | 100.00 | 0.62 | 0.00               | 2.21 | 0.03 |
| COVID-19                      | 3      | 50      | 26     | 1393    | 3.48     | 1.15     | 10.52   | 100.00 | 0.62 | 0.00               | 2.21 | 0.03 |
| 12 - OY Antunez-Montes et al  | 0      | 7       | 1      | 174     | 7.71     | 0.29     | 205.55  | 11.36  |      |                    |      |      |
| 15 - JP Armann et al          | 1      | 7       | 7      | 95      | 2.10     | 0.22     | 19.93   | 24.12  |      |                    |      |      |
| 28 - H Cairoli                | 0      | 9       | 1      | 569     | 19.95    | 0.76     | 521.81  | 11.49  |      |                    |      |      |
| 79 - F Gotzinger et al        | 2      | 27      | 17     | 555     | 2.53     | 0.55     | 11.56   | 53.04  |      |                    |      |      |
| PIMS-TS/MIS-C                 | 0      | 0       | 0      | 0       | 0.00     | 0.00     | 0.00    | 0.00   | 0.00 | 0.00               | 0.00 | 0.00 |
| Admission to Critical Care    | 10     | 72      | 152    | 1837    | 1.77     | 0.51     | 6.11    | 100.00 | 0.01 | 58.59              | 0.91 | 0.36 |
| COVID-19                      | 10     | 72      | 152    | 1837    | 1.77     | 0.51     | 6.11    | 100.00 | 0.01 | 58.59              | 0.91 | 0.36 |
| 12 - OY Antunez-Montes et al  | 0      | 7       | 11     | 174     | 0.95     | 0.05     | 17.65   | 9.59   |      |                    |      |      |
| 136 - G Qian et al            | 2      | 3       | 5      | 124     | 47.60    | 3.67     | 616.85  | 10.96  |      |                    |      |      |
| 13 - AR Araujo da Silva et al | 0      | 5       | 26     | 45      | 0.07     | 0.00     | 1.28    | 9.49   |      |                    |      |      |
| 155 - Kyung Sung              | 0      | 3       | 0      | 98      | 0.00     | 0.00     | 0.00    | 0.00   |      |                    |      |      |
| 15 - JP Armann et al          | 1      | 7       | 14     | 95      | 0.96     | 0.11     | 8.63    | 12.54  |      |                    |      |      |
| 28 - H Cairoli                | 0      | 9       | 3      | 569     | 8.52     | 0.41     | 176.63  | 9.22   |      |                    |      |      |
| 32 - J Chao et al             | 1      | 1       | 12     | 45      | 8.04     | 0.31     | 210.67  | 8.47   |      |                    |      |      |
| 67 - G Fisler et al           | 0      | 5       | 30     | 72      | 0.13     | 0.01     | 2.38    | 9.57   |      |                    |      |      |
| 79 - F Gotzinger et al        | 5      | 27      | 43     | 555     | 2.71     | 0.98     | 7.50    | 18.14  |      |                    |      |      |
| 91 - M Kainth et al           | 1      | 5       | 8      | 60      | 1.63     | 0.16     | 16.44   | 12.00  |      |                    |      |      |
| PIMS-TS/MIS-C                 | 0      | 0       | 0      | 0       | 0.00     | 0.00     | 0.00    | 0.00   | 0.00 | 0.00               | 0.00 | 0.00 |
| Death                         | 5      | 119     | 16     | 6025    | 12.83    | 4.02     | 40.99   | 100.00 | 0.18 | 30.42              | 4.31 | 0.00 |
| COVID-19                      | 4      | 118     | 16     | 5995    | 10.76    | 3.27     | 35.41   | 93.77  | 0.18 | 30.99              | 3.91 | 0.00 |
| 12 - OY Antunez-Montes et al  | 0      | 7       | 1      | 174     | 7.71     | 0.29     | 205.55  | 9.38   |      |                    |      |      |
| 13 - AR Araujo da Silva et al | 0      | 5       | 1      | 45      | 2.70     | 0.10     | 74.67   | 9.22   |      |                    |      |      |
| 155 - Kyung Sung              | 0      | 3       | 0      | 98      | 0.00     | 0.00     | 0.00    | 0.00   |      |                    |      |      |
| 157 - O Swann et al           | 1      | 48      | 5      | 603     | 2.54     | 0.29     | 22.23   | 16.24  |      |                    |      |      |
| 15 - JP Armann et al          | 0      | 7       | 1      | 95      | 4.20     | 0.16     | 112.27  | 9.36   |      |                    |      |      |
| 19 - S Bellino et al          | 1      | 11      | 3      | 3825    | 127.40   | 12.19    | 1331.49 | 14.80  |      |                    |      |      |
| 28 - H Cairoli                | 1      | 9       | 1      | 569     | 71.00    | 4.07     | 1237.66 | 11.45  |      |                    |      |      |



| Name                             | Events |         | Events |         | Effect Estimate | CI Start | CI End   | Weight | P(Q) | I <sup>2</sup> (Q) | Z    | P(Z) |
|----------------------------------|--------|---------|--------|---------|-----------------|----------|----------|--------|------|--------------------|------|------|
|                                  | 1      | Total 1 | 2      | Total 2 |                 |          |          |        |      |                    |      |      |
| 79 - F Gotzinger et al           | 1      | 27      | 3      | 555     | 7.08            | 0.71     | 70.38    | 15.18  |      |                    |      |      |
| 92 - R Marcello et al            | 0      | 1       | 1      | 31      | 6.78            | 0.19     | 247.05   | 8.16   |      |                    |      |      |
| PIMS-TS/MIS-C                    | 1      | 1       | 0      | 30      | 183.00          | 2.61     | 12814.59 | 6.23   | 1.00 | 0.00               | 2.40 | 0.02 |
| 121 - C Moraleda et al           | 1      | 1       | 0      | 30      | 183.00          | 2.61     | 12814.59 | 6.23   |      |                    |      |      |
| Non-malig haematological disease |        |         |        |         |                 |          |          |        |      |                    |      |      |
| Invasive Ventilation             | 25     | 232     | 773    | 8695    | 2.11            | 0.99     | 4.52     | 100.00 | 0.34 | 11.29              | 1.93 | 0.05 |
| COVID-19                         | 25     | 232     | 773    | 8695    | 2.11            | 0.99     | 4.52     | 100.00 | 0.34 | 11.29              | 1.93 | 0.05 |
| 151 - B Sousa et al              | 24     | 178     | 731    | 6758    | 1.28            | 0.83     | 1.99     | 67.16  |      |                    |      |      |
| 15 - JP Armann et al             | 0      | 2       | 6      | 100     | 2.91            | 0.13     | 67.09    | 5.49   |      |                    |      |      |
| 174 - P Zachariah et al          | 1      | 2       | 8      | 48      | 5.00            | 0.28     | 88.53    | 6.47   |      |                    |      |      |
| 21 - D Bayesheva et al           | 0      | 34      | 1      | 518     | 5.00            | 0.20     | 125.03   | 5.23   |      |                    |      |      |
| 28 - H Cairoli                   | 0      | 10      | 1      | 568     | 18.02           | 0.69     | 468.51   | 5.11   |      |                    |      |      |
| 75 - V Giacomet et al            | 0      | 1       | 1      | 126     | 27.89           | 0.78     | 1003.14  | 4.27   |      |                    |      |      |
| 79 - F Gotzinger et al           | 0      | 5       | 25     | 577     | 1.97            | 0.11     | 36.60    | 6.27   |      |                    |      |      |
| PIMS-TS/MIS-C                    | 0      | 0       | 0      | 0       | 0.00            | 0.00     | 0.00     | 0.00   | 0.00 | 0.00               | 0.00 | 0.00 |
| Cardiovascular Support           | 1      | 17      | 27     | 1245    | 6.82            | 1.39     | 33.37    | 100.00 | 0.62 | 0.00               | 2.37 | 0.02 |
| COVID-19                         | 1      | 17      | 27     | 1245    | 6.82            | 1.39     | 33.37    | 100.00 | 0.62 | 0.00               | 2.37 | 0.02 |
| 15 - JP Armann et al             | 0      | 2       | 8      | 100     | 2.18            | 0.10     | 49.12    | 25.98  |      |                    |      |      |
| 28 - H Cairoli                   | 0      | 10      | 1      | 568     | 18.02           | 0.69     | 468.51   | 23.77  |      |                    |      |      |
| 79 - F Gotzinger et al           | 1      | 5       | 18     | 577     | 7.76            | 0.83     | 73.00    | 50.25  |      |                    |      |      |
| PIMS-TS/MIS-C                    | 0      | 0       | 0      | 0       | 0.00            | 0.00     | 0.00     | 0.00   | 0.00 | 0.00               | 0.00 | 0.00 |
| Admission to Critical Care       | 49     | 234     | 1905   | 8708    | 1.07            | 0.77     | 1.47     | 100.00 | 0.74 | 0.00               | 0.39 | 0.70 |
| COVID-19                         | 49     | 234     | 1905   | 8708    | 1.07            | 0.77     | 1.47     | 100.00 | 0.74 | 0.00               | 0.39 | 0.70 |
| 151 - B Sousa et al              | 48     | 178     | 1819   | 6758    | 1.00            | 0.72     | 1.40     | 92.33  |      |                    |      |      |
| 15 - JP Armann et al             | 0      | 2       | 15     | 100     | 1.10            | 0.05     | 24.11    | 1.09   |      |                    |      |      |
| 21 - D Bayesheva et al           | 0      | 34      | 4      | 518     | 1.66            | 0.09     | 31.41    | 1.20   |      |                    |      |      |
| 28 - H Cairoli                   | 0      | 10      | 3      | 568     | 7.69            | 0.37     | 158.51   | 1.13   |      |                    |      |      |
| 75 - V Giacomet et al            | 0      | 1       | 8      | 126     | 4.65            | 0.18     | 122.93   | 0.97   |      |                    |      |      |
| 79 - F Gotzinger et al           | 1      | 5       | 47     | 577     | 2.82            | 0.31     | 25.74    | 2.12   |      |                    |      |      |
| 91 - M Kainth et al              | 0      | 4       | 9      | 61      | 0.61            | 0.03     | 12.36    | 1.15   |      |                    |      |      |

| Name                           | Events |         | Events |         | Effect Estimate | CI Start | CI End  | Weight | P(Q) | I <sup>2</sup> (Q) | Z    | P(Z) |
|--------------------------------|--------|---------|--------|---------|-----------------|----------|---------|--------|------|--------------------|------|------|
|                                | 1      | Total 1 | 2      | Total 2 |                 |          |         |        |      |                    |      |      |
| PIMS-TS/MIS-C                  | 0      | 0       | 0      | 0       | 0.00            | 0.00     | 0.00    | 0.00   | 0.00 | 0.00               | 0.00 | 0.00 |
| Death                          | 26     | 230     | 546    | 8551    | 2.20            | 1.46     | 3.32    | 100.00 | 0.43 | 0.00               | 3.75 | 0.00 |
| COVID-19                       | 26     | 229     | 545    | 8521    | 2.92            | 1.20     | 7.13    | 98.69  | 0.32 | 13.84              | 2.35 | 0.02 |
| 151 - B Sousa et al            | 26     | 178     | 538    | 6758    | 1.98            | 1.29     | 3.03    | 93.66  |      |                    |      |      |
| 15 - JP Armann et al           | 0      | 2       | 1      | 100     | 13.27           | 0.43     | 412.87  | 1.43   |      |                    |      |      |
| 21 - D Bayesheva et al         | 0      | 34      | 0      | 518     | 0.00            | 0.00     | 0.00    | 0.00   |      |                    |      |      |
| 28 - H Cairoli                 | 0      | 10      | 2      | 568     | 10.79           | 0.49     | 238.84  | 1.77   |      |                    |      |      |
| 79 - F Gotzinger et al         | 0      | 5       | 4      | 577     | 11.59           | 0.55     | 242.21  | 1.83   |      |                    |      |      |
| PIMS-TS/MIS-C                  | 0      | 1       | 1      | 30      | 6.56            | 0.18     | 239.09  | 1.31   | 1.00 | 0.00               | 1.02 | 0.31 |
| 121 - C Moraleda et al         | 0      | 1       | 1      | 30      | 6.56            | 0.18     | 239.09  | 1.31   |      |                    |      |      |
| Transplant (BM or solid organ) |        |         |        |         |                 |          |         |        |      |                    |      |      |
| Invasive Ventilation           | 2      | 3       | 12     | 176     | 17.08           | 1.62     | 180.17  | 100.00 | 0.30 | 6.76               | 2.36 | 0.02 |
| COVID-19                       | 2      | 3       | 12     | 176     | 17.08           | 1.62     | 180.17  | 100.00 | 0.30 | 6.76               | 2.36 | 0.02 |
| 15 - JP Armann et al           | 0      | 1       | 6      | 101     | 4.90            | 0.18     | 132.48  | 47.73  |      |                    |      |      |
| 67 - G Fisler et al            | 2      | 2       | 6      | 75      | 53.46           | 2.31     | 1236.38 | 52.27  |      |                    |      |      |
| PIMS-TS/MIS-C                  | 0      | 0       | 0      | 0       | 0.00            | 0.00     | 0.00    | 0.00   | 0.00 | 0.00               | 0.00 | 0.00 |
| Cardiovascular Support         | 0      | 1       | 8      | 101     | 3.67            | 0.14     | 97.13   | 100.00 | 1.00 | 0.00               | 0.78 | 0.44 |
| COVID-19                       | 0      | 1       | 8      | 101     | 3.67            | 0.14     | 97.13   | 100.00 | 1.00 | 0.00               | 0.78 | 0.44 |
| 15 - JP Armann et al           | 0      | 1       | 8      | 101     | 3.67            | 0.14     | 97.13   | 100.00 |      |                    |      |      |
| PIMS-TS/MIS-C                  | 0      | 0       | 0      | 0       | 0.00            | 0.00     | 0.00    | 0.00   | 0.00 | 0.00               | 0.00 | 0.00 |
| Admission to Critical Care     | 1      | 3       | 44     | 176     | 1.70            | 0.20     | 14.22   | 100.00 | 0.94 | 0.00               | 0.49 | 0.63 |
| COVID-19                       | 1      | 3       | 44     | 176     | 1.70            | 0.20     | 14.22   | 100.00 | 0.94 | 0.00               | 0.49 | 0.63 |
| 15 - JP Armann et al           | 0      | 1       | 15     | 101     | 1.86            | 0.07     | 47.78   | 42.85  |      |                    |      |      |
| 67 - G Fisler et al            | 1      | 2       | 29     | 75      | 1.59            | 0.10     | 26.36   | 57.15  |      |                    |      |      |
| PIMS-TS/MIS-C                  | 0      | 0       | 0      | 0       | 0.00            | 0.00     | 0.00    | 0.00   | 0.00 | 0.00               | 0.00 | 0.00 |
| Death                          | 0      | 1       | 1      | 101     | 22.33           | 0.62     | 804.17  | 100.00 | 1.00 | 0.00               | 1.70 | 0.09 |
| COVID-19                       | 0      | 1       | 1      | 101     | 22.33           | 0.62     | 804.17  | 100.00 | 1.00 | 0.00               | 1.70 | 0.09 |
| 15 - JP Armann et al           | 0      | 1       | 1      | 101     | 22.33           | 0.62     | 804.17  | 100.00 |      |                    |      |      |
| PIMS-TS/MIS-C                  | 0      | 0       | 0      | 0       | 0.00            | 0.00     | 0.00    | 0.00   | 0.00 | 0.00               | 0.00 | 0.00 |
| Immunosuppression (other)      |        |         |        |         |                 |          |         |        |      |                    |      |      |

| Name                         | Events |         | Events |         | Effect   |          |        | Weight | P(Q) | I <sup>2</sup> (Q) | Z    | P(Z) |
|------------------------------|--------|---------|--------|---------|----------|----------|--------|--------|------|--------------------|------|------|
|                              | 1      | Total 1 | 2      | Total 2 | Estimate | CI Start | CI End |        |      |                    |      |      |
| Invasive Ventilation         | 67     | 417     | 757    | 7628    | 3.01     | 1.04     | 8.70   | 100.00 | 0.05 | 51.77              | 2.04 | 0.04 |
| COVID-19                     | 66     | 416     | 734    | 7562    | 2.92     | 0.91     | 9.38   | 91.91  | 0.04 | 58.24              | 1.80 | 0.07 |
| 12 - OY Antunez-Montes et al | 0      | 2       | 3      | 179     | 10.09    | 0.40     | 251.27 | 8.18   |      |                    |      |      |
| 151 - B Sousa et al          | 61     | 369     | 694    | 6567    | 1.68     | 1.26     | 2.23   | 32.12  |      |                    |      |      |
| 15 - JP Armann et al         | 3      | 6       | 3      | 96      | 31.00    | 4.32     | 222.40 | 15.41  |      |                    |      |      |
| 174 - P Zachariah et al      | 1      | 8       | 8      | 42      | 0.61     | 0.07     | 5.66   | 13.39  |      |                    |      |      |
| 75 - V Giacomet et al        | 0      | 2       | 2      | 125     | 9.88     | 0.37     | 263.72 | 7.92   |      |                    |      |      |
| 79 - F Gotzinger et al       | 1      | 29      | 24     | 553     | 0.79     | 0.10     | 6.03   | 14.88  |      |                    |      |      |
| PIMS-TS/MIS-C                | 1      | 1       | 23     | 66      | 5.55     | 0.22     | 141.75 | 8.09   | 1.00 | 0.00               | 1.04 | 0.30 |
| 12 - OY Antunez-Montes et al | 1      | 1       | 23     | 66      | 5.55     | 0.22     | 141.75 | 8.09   |      |                    |      |      |
| Cardiovascular Support       | 2      | 38      | 49     | 894     | 2.95     | 0.61     | 14.27  | 100.00 | 0.31 | 17.06              | 1.35 | 0.18 |
| COVID-19                     | 1      | 37      | 27     | 828     | 2.59     | 0.30     | 22.27  | 79.69  | 0.17 | 43.25              | 0.87 | 0.38 |
| 12 - OY Antunez-Montes et al | 0      | 2       | 1      | 179     | 23.80    | 0.77     | 738.85 | 18.35  |      |                    |      |      |
| 15 - JP Armann et al         | 1      | 6       | 7      | 96      | 2.54     | 0.26     | 24.88  | 35.85  |      |                    |      |      |
| 79 - F Gotzinger et al       | 0      | 29      | 19     | 553     | 0.46     | 0.03     | 7.88   | 25.49  |      |                    |      |      |
| PIMS-TS/MIS-C                | 1      | 1       | 22     | 66      | 5.93     | 0.23     | 151.58 | 20.31  | 1.00 | 0.00               | 1.08 | 0.28 |
| 12 - OY Antunez-Montes et al | 1      | 1       | 22     | 66      | 5.93     | 0.23     | 151.58 | 20.31  |      |                    |      |      |
| Admission to Critical Care   | 136    | 492     | 1982   | 8337    | 1.29     | 0.88     | 1.90   | 100.00 | 0.32 | 12.54              | 1.30 | 0.19 |
| COVID-19                     | 135    | 491     | 1955   | 8271    | 1.27     | 0.84     | 1.94   | 98.61  | 0.28 | 17.31              | 1.13 | 0.26 |
| 12 - OY Antunez-Montes et al | 0      | 2       | 11     | 179     | 2.93     | 0.13     | 64.70  | 1.52   |      |                    |      |      |
| 151 - B Sousa et al          | 116    | 369     | 1751   | 6567    | 1.26     | 1.01     | 1.58   | 54.16  |      |                    |      |      |
| 157 - O Swann et al          | 6      | 48      | 72     | 532     | 0.91     | 0.37     | 2.22   | 14.62  |      |                    |      |      |
| 15 - JP Armann et al         | 4      | 6       | 11     | 96      | 15.45    | 2.53     | 94.42  | 4.25   |      |                    |      |      |
| 224 - Graff et al            | 1      | 12      | 10     | 54      | 0.40     | 0.05     | 3.47   | 3.04   |      |                    |      |      |
| 32 - J Chao et al            | 1      | 2       | 12     | 44      | 2.67     | 0.15     | 46.11  | 1.78   |      |                    |      |      |
| 67 - G Fisler et al          | 3      | 9       | 27     | 68      | 0.76     | 0.17     | 3.30   | 6.24   |      |                    |      |      |
| 75 - V Giacomet et al        | 0      | 2       | 8      | 125     | 2.76     | 0.12     | 62.31  | 1.50   |      |                    |      |      |
| 79 - F Gotzinger et al       | 3      | 29      | 45     | 553     | 1.30     | 0.38     | 4.47   | 8.52   |      |                    |      |      |
| 91 - M Kainth et al          | 1      | 12      | 8      | 53      | 0.51     | 0.06     | 4.53   | 2.98   |      |                    |      |      |
| PIMS-TS/MIS-C                | 1      | 1       | 27     | 66      | 4.31     | 0.17     | 109.74 | 1.39   | 1.00 | 0.00               | 0.88 | 0.38 |

| Name                          | Events |         | Events |         | Effect   |          |         | Weight | P(Q) | I <sup>2</sup> (Q) | Z    | P(Z) |
|-------------------------------|--------|---------|--------|---------|----------|----------|---------|--------|------|--------------------|------|------|
|                               | 1      | Total 1 | 2      | Total 2 | Estimate | CI Start | CI End  |        |      |                    |      |      |
| 12 - OY Antunez-Montes et al  | 1      | 1       | 27     | 66      | 4.31     | 0.17     | 109.74  | 1.39   |      |                    |      |      |
| Death                         | 77     | 407     | 497    | 7462    | 3.50     | 2.23     | 5.50    | 100.00 | 0.39 | 2.69               | 5.45 | 0.00 |
| COVID-19                      | 77     | 406     | 493    | 7396    | 4.93     | 1.57     | 15.50   | 98.20  | 0.25 | 26.34              | 2.73 | 0.01 |
| 12 - OY Antunez-Montes et al  | 0      | 2       | 1      | 179     | 23.80    | 0.77     | 738.85  | 1.70   |      |                    |      |      |
| 151 - B Sousa et al           | 76     | 369     | 488    | 6567    | 3.23     | 2.47     | 4.23    | 92.37  |      |                    |      |      |
| 15 - JP Armann et al          | 1      | 6       | 0      | 96      | 52.64    | 1.91     | 1447.13 | 1.83   |      |                    |      |      |
| 79 - F Gotzinger et al        | 0      | 29      | 4      | 554     | 2.07     | 0.11     | 39.42   | 2.30   |      |                    |      |      |
| PIMS-TS/MIS-C                 | 0      | 1       | 4      | 66      | 4.63     | 0.16     | 130.71  | 1.80   | 1.00 | 0.00               | 0.90 | 0.37 |
| 12 - OY Antunez-Montes et al  | 0      | 1       | 4      | 66      | 4.63     | 0.16     | 130.71  | 1.80   |      |                    |      |      |
| T21                           |        |         |        |         |          |          |         |        |      |                    |      |      |
| Invasive Ventilation          | 20     | 93      | 761    | 8003    | 5.97     | 1.23     | 28.86   | 100.00 | 0.06 | 65.23              | 2.22 | 0.03 |
| COVID-19                      | 20     | 93      | 761    | 8003    | 5.97     | 1.23     | 28.86   | 100.00 | 0.06 | 65.23              | 2.22 | 0.03 |
| 151 - B Sousa et al           | 18     | 83      | 737    | 6853    | 2.30     | 1.36     | 3.89    | 50.95  |      |                    |      |      |
| 26 - CE Bolaños-Almeida et al | 0      | 2       | 1      | 576     | 76.73    | 2.48     | 2376.96 | 15.17  |      |                    |      |      |
| 79 - F Gotzinger et al        | 2      | 8       | 23     | 574     | 7.99     | 1.53     | 41.74   | 33.88  |      |                    |      |      |
| PIMS-TS/MIS-C                 | 0      | 0       | 0      | 0       | 0.00     | 0.00     | 0.00    | 0.00   | 0.00 | 0.00               | 0.00 | 0.00 |
| Cardiovascular Support        | 2      | 10      | 18     | 1150    | 16.38    | 3.33     | 80.55   | 100.00 | 0.30 | 5.31               | 3.44 | 0.00 |
| COVID-19                      | 2      | 10      | 18     | 1150    | 16.38    | 3.33     | 80.55   | 100.00 | 0.30 | 5.31               | 3.44 | 0.00 |
| 26 - CE Bolaños-Almeida et al | 0      | 2       | 1      | 576     | 76.73    | 2.48     | 2376.96 | 20.80  |      |                    |      |      |
| 79 - F Gotzinger et al        | 2      | 8       | 17     | 574     | 10.92    | 2.05     | 58.10   | 79.20  |      |                    |      |      |
| PIMS-TS/MIS-C                 | 0      | 0       | 0      | 0       | 0.00     | 0.00     | 0.00    | 0.00   | 0.00 | 0.00               | 0.00 | 0.00 |
| Admission to Critical Care    | 36     | 93      | 1882   | 8003    | 3.08     | 1.02     | 9.32    | 100.00 | 0.17 | 43.95              | 1.99 | 0.05 |
| COVID-19                      | 36     | 93      | 1882   | 8003    | 3.08     | 1.02     | 9.32    | 100.00 | 0.17 | 43.95              | 1.99 | 0.05 |
| 151 - B Sousa et al           | 34     | 83      | 1833   | 6853    | 1.90     | 1.22     | 2.95    | 62.17  |      |                    |      |      |
| 26 - CE Bolaños-Almeida et al | 0      | 2       | 3      | 576     | 32.77    | 1.32     | 814.54  | 10.14  |      |                    |      |      |
| 79 - F Gotzinger et al        | 2      | 8       | 46     | 574     | 3.83     | 0.75     | 19.50   | 27.69  |      |                    |      |      |
| PIMS-TS/MIS-C                 | 0      | 0       | 0      | 0       | 0.00     | 0.00     | 0.00    | 0.00   | 0.00 | 0.00               | 0.00 | 0.00 |
| Death                         | 15     | 93      | 555    | 8003    | 5.12     | 1.08     | 24.40   | 100.00 | 0.19 | 40.64              | 2.05 | 0.04 |
| COVID-19                      | 15     | 93      | 555    | 8003    | 5.12     | 1.08     | 24.40   | 100.00 | 0.19 | 40.64              | 2.05 | 0.04 |
| 151 - B Sousa et al           | 15     | 83      | 549    | 6853    | 2.53     | 1.44     | 4.46    | 63.47  |      |                    |      |      |

| Name                          | Events |         | Events |         | Effect Estimate | CI Start | CI End  | Weight | P(Q) | I <sup>2</sup> (Q) | Z    | P(Z) |
|-------------------------------|--------|---------|--------|---------|-----------------|----------|---------|--------|------|--------------------|------|------|
|                               | 1      | Total 1 | 2      | Total 2 |                 |          |         |        |      |                    |      |      |
| 26 - CE Bolaños-Almeida et al | 0      | 2       | 2      | 576     | 45.96           | 1.73     | 1222.24 | 17.06  |      |                    |      |      |
| 79 - F Gotzinger et al        | 0      | 8       | 4      | 574     | 7.46            | 0.37     | 149.67  | 19.47  |      |                    |      |      |
| PIMS-TS/MIS-C                 | 0      | 0       | 0      | 0       | 0.00            | 0.00     | 0.00    | 0.00   | 0.00 | 0.00               | 0.00 | 0.00 |
| Metabolic including obesity   |        |         |        |         |                 |          |         |        |      |                    |      |      |
| Invasive Ventilation          | 30     | 148     | 804    | 9212    | 5.12            | 2.25     | 11.64   | 100.00 | 0.10 | 35.15              | 3.89 | 0.00 |
| COVID-19                      | 29     | 143     | 798    | 9187    | 7.25            | 2.71     | 19.43   | 86.21  | 0.04 | 48.86              | 3.94 | 0.00 |
| 151 - B Sousa et al           | 20     | 104     | 735    | 6832    | 1.98            | 1.21     | 3.24    | 25.56  |      |                    |      |      |
| 15 - JP Armann et al          | 0      | 1       | 6      | 101     | 4.90            | 0.18     | 132.48  | 5.09   |      |                    |      |      |
| 170 - B Yayla et al           | 0      | 1       | 1      | 76      | 16.78           | 0.47     | 605.19  | 4.43   |      |                    |      |      |
| 174 - P Zachariah et al       | 6      | 11      | 3      | 39      | 14.40           | 2.71     | 76.65   | 13.00  |      |                    |      |      |
| 21 - D Bayesheva et al        | 0      | 1       | 1      | 551     | 122.33          | 3.41     | 4385.74 | 4.44   |      |                    |      |      |
| 28 - H Cairoli                | 0      | 5       | 1      | 573     | 34.70           | 1.27     | 949.17  | 5.06   |      |                    |      |      |
| 46 - M Ceano-Vivas et al      | 1      | 2       | 0      | 31      | 63.00           | 1.73     | 2295.08 | 4.41   |      |                    |      |      |
| 54 - A Desai et al            | 2      | 14      | 25     | 279     | 1.69            | 0.36     | 8.00    | 14.05  |      |                    |      |      |
| 75 - V Giacomet et al         | 0      | 3       | 1      | 124     | 11.76           | 0.40     | 342.81  | 4.90   |      |                    |      |      |
| 79 - F Gotzinger et al        | 0      | 1       | 25     | 581     | 7.27            | 0.29     | 183.00  | 5.28   |      |                    |      |      |
| PIMS-TS/MIS-C                 | 1      | 5       | 6      | 25      | 1.25            | 0.16     | 9.46    | 13.79  | 0.88 | 0.00               | 0.22 | 0.83 |
| 10 - Z Almoussa et al         | 0      | 3       | 1      | 7       | 0.62            | 0.02     | 19.58   | 4.71   |      |                    |      |      |
| 13 - AR Araujo da Silva et al | 0      | 1       | 2      | 13      | 1.53            | 0.05     | 49.80   | 4.65   |      |                    |      |      |
| 9 - M Alharbi et al           | 1      | 1       | 3      | 5       | 2.14            | 0.06     | 77.54   | 4.42   |      |                    |      |      |
| Cardiovascular Support        | 4      | 15      | 35     | 1372    | 6.78            | 0.95     | 48.48   | 100.00 | 0.12 | 45.98              | 1.91 | 0.06 |
| COVID-19                      | 1      | 10      | 28     | 1362    | 15.59           | 2.93     | 83.02   | 77.06  | 0.64 | 0.00               | 3.22 | 0.00 |
| 15 - JP Armann et al          | 0      | 1       | 8      | 101     | 3.67            | 0.14     | 97.13   | 19.74  |      |                    |      |      |
| 170 - B Yayla et al           | 0      | 1       | 0      | 76      | 0.00            | 0.00     | 0.00    | 0.00   |      |                    |      |      |
| 28 - H Cairoli                | 0      | 5       | 1      | 573     | 34.70           | 1.27     | 949.17  | 19.53  |      |                    |      |      |
| 46 - M Ceano-Vivas et al      | 1      | 2       | 0      | 31      | 63.00           | 1.73     | 2295.08 | 17.76  |      |                    |      |      |
| 79 - F Gotzinger et al        | 0      | 1       | 19     | 581     | 9.62            | 0.38     | 243.63  | 20.04  |      |                    |      |      |
| PIMS-TS/MIS-C                 | 3      | 5       | 7      | 10      | 0.38            | 0.02     | 6.35    | 22.94  | 0.00 | 100.00             | 0.68 | 0.50 |
| 10 - Z Almoussa et al         | 1      | 3       | 4      | 7       | 0.38            | 0.02     | 6.35    | 22.94  |      |                    |      |      |
| 41 - RL Crawford et al        | 2      | 2       | 3      | 3       | 0.00            | 0.00     | 0.00    | 0.00   |      |                    |      |      |

| Name                          | Events |         | Events |         | Effect   |          |         | Weight | P(Q) | I <sup>2</sup> (Q) | Z    | P(Z) |
|-------------------------------|--------|---------|--------|---------|----------|----------|---------|--------|------|--------------------|------|------|
|                               | 1      | Total 1 | 2      | Total 2 | Estimate | CI Start | CI End  |        |      |                    |      |      |
| Admission to Critical Care    | 279    | 494     | 2528   | 10393   | 2.08     | 1.50     | 2.88    | 100.00 | 0.24 | 17.47              | 4.40 | 0.00 |
| COVID-19                      | 75     | 192     | 2031   | 9547    | 2.48     | 1.66     | 3.70    | 62.74  | 0.35 | 9.54               | 4.44 | 0.00 |
| 151 - B Sousa et al           | 47     | 104     | 1820   | 6832    | 2.27     | 1.54     | 3.35    | 26.75  |      |                    |      |      |
| 157 - O Swann et al           | 4      | 14      | 74     | 566     | 2.66     | 0.81     | 8.70    | 6.43   |      |                    |      |      |
| 15 - JP Armann et al          | 1      | 1       | 14     | 101     | 18.10    | 0.70     | 466.19  | 0.98   |      |                    |      |      |
| 163 - S Verma et al           | 10     | 19      | 13     | 63      | 4.27     | 1.44     | 12.68   | 7.42   |      |                    |      |      |
| 170 - B Yayla et al           | 0      | 1       | 1      | 76      | 16.78    | 0.47     | 605.19  | 0.81   |      |                    |      |      |
| 21 - D Bayesheva et al        | 0      | 1       | 4      | 551     | 40.56    | 1.45     | 1135.72 | 0.93   |      |                    |      |      |
| 224 - Graff et al             | 4      | 15      | 7      | 51      | 2.29     | 0.57     | 9.22    | 4.84   |      |                    |      |      |
| 28 - H Cairoli                | 0      | 5       | 3      | 573     | 14.82    | 0.68     | 322.38  | 1.09   |      |                    |      |      |
| 32 - J Chao et al             | 3      | 14      | 10     | 32      | 0.60     | 0.14     | 2.63    | 4.35   |      |                    |      |      |
| 46 - M Ceano-Vivas et al      | 1      | 2       | 4      | 31      | 6.75     | 0.35     | 130.79  | 1.17   |      |                    |      |      |
| 67 - G Fisler et al           | 5      | 12      | 25     | 65      | 1.14     | 0.33     | 4.00    | 5.85   |      |                    |      |      |
| 75 - V Giacomet et al         | 0      | 3       | 8      | 125     | 1.97     | 0.09     | 41.44   | 1.11   |      |                    |      |      |
| 79 - F Gotzinger et al        | 0      | 1       | 48     | 481     | 2.98     | 0.12     | 74.15   | 1.00   |      |                    |      |      |
| PIMS-TS/MIS-C                 | 204    | 302     | 497    | 846     | 1.45     | 1.10     | 1.92    | 37.26  | 0.77 | 0.00               | 2.64 | 0.01 |
| 10 - Z Almoussa et al         | 3      | 3       | 6      | 7       | 1.62     | 0.05     | 51.11   | 0.87   |      |                    |      |      |
| 13 - AR Araujo da Silva et al | 1      | 1       | 11     | 13      | 0.65     | 0.02     | 21.18   | 0.86   |      |                    |      |      |
| 226 - Abrams et al            | 189    | 286     | 459    | 794     | 1.42     | 1.07     | 1.89    | 32.72  |      |                    |      |      |
| 41 - RL Crawford et al        | 2      | 2       | 2      | 3       | 3.00     | 0.08     | 115.34  | 0.78   |      |                    |      |      |
| 5 - N Abdel-Haq et al         | 8      | 9       | 14     | 24      | 5.71     | 0.61     | 53.23   | 2.03   |      |                    |      |      |
| 9 - M Alharbi et al           | 1      | 1       | 5      | 5       | 0.00     | 0.00     | 0.00    | 0.00   |      |                    |      |      |
| Death                         | 18     | 121     | 557    | 8735    | 8.68     | 2.32     | 32.41   | 100.00 | 0.11 | 42.47              | 3.21 | 0.00 |
| COVID-19                      | 17     | 115     | 556    | 8712    | 11.65    | 2.43     | 55.85   | 88.30  | 0.06 | 52.07              | 3.07 | 0.00 |
| 151 - B Sousa et al           | 16     | 104     | 548    | 6832    | 2.08     | 1.22     | 3.58    | 35.49  |      |                    |      |      |
| 15 - JP Armann et al          | 0      | 1       | 1      | 101     | 22.33    | 0.62     | 804.17  | 9.95   |      |                    |      |      |
| 170 - B Yayla et al           | 0      | 1       | 1      | 76      | 16.78    | 0.47     | 605.19  | 9.95   |      |                    |      |      |
| 21 - D Bayesheva et al        | 0      | 1       | 0      | 551     | 0.00     | 0.00     | 0.00    | 0.00   |      |                    |      |      |
| 28 - H Cairoli                | 0      | 5       | 2      | 573     | 20.78    | 0.89     | 485.13  | 11.95  |      |                    |      |      |
| 46 - M Ceano-Vivas et al      | 1      | 2       | 0      | 31      | 63.00    | 1.73     | 2295.08 | 9.91   |      |                    |      |      |

| Name                          | Events |         | Events |         | Effect Estimate | CI Start | CI End  | Weight | P(Q) | I <sup>2</sup> (Q) | Z    | P(Z) |
|-------------------------------|--------|---------|--------|---------|-----------------|----------|---------|--------|------|--------------------|------|------|
|                               | 1      | Total 1 | 2      | Total 2 |                 |          |         |        |      |                    |      |      |
| 79 - F Gotzinger et al        | 0      | 1       | 4      | 548     | 40.33           | 1.44     | 1129.51 | 11.06  |      |                    |      |      |
| PIMS-TS/MIS-C                 | 1      | 6       | 1      | 23      | 3.00            | 0.12     | 73.64   | 11.70  | 1.00 | 0.00               | 0.67 | 0.50 |
| 10 - Z Almourssa et al        | 1      | 3       | 1      | 7       | 3.00            | 0.12     | 73.64   | 11.70  |      |                    |      |      |
| 13 - AR Araujo da Silva et al | 0      | 1       | 0      | 13      | 0.00            | 0.00     | 0.00    | 0.00   |      |                    |      |      |
| 41 - RL Crawford et al        | 0      | 2       | 0      | 3       | 0.00            | 0.00     | 0.00    | 0.00   |      |                    |      |      |
| Endocrine including DM        |        |         |        |         |                 |          |         |        |      |                    |      |      |
| Invasive Ventilation          | 4      | 24      | 43     | 1942    | 10.73           | 3.53     | 32.61   | 100.00 | 0.70 | 0.00               | 4.19 | 0.00 |
| COVID-19                      | 3      | 22      | 40     | 1919    | 12.58           | 3.64     | 43.41   | 80.47  | 0.58 | 0.00               | 4.01 | 0.00 |
| 15 - JP Armann et al          | 1      | 2       | 5      | 100     | 19.00           | 1.03     | 350.19  | 14.54  |      |                    |      |      |
| 170 - B Yayla et al           | 0      | 1       | 1      | 76      | 16.78           | 0.47     | 605.19  | 9.60   |      |                    |      |      |
| 174 - P Zachariah et al       | 2      | 3       | 7      | 47      | 11.43           | 0.91     | 143.64  | 19.27  |      |                    |      |      |
| 21 - D Bayesheva et al        | 0      | 3       | 1      | 549     | 52.24           | 1.80     | 1517.10 | 10.88  |      |                    |      |      |
| 28 - H Cairoli                | 0      | 6       | 1      | 572     | 29.31           | 1.09     | 788.80  | 11.39  |      |                    |      |      |
| 79 - F Gotzinger et al        | 0      | 7       | 25     | 575     | 1.44            | 0.08     | 25.90   | 14.78  |      |                    |      |      |
| PIMS-TS/MIS-C                 | 1      | 2       | 3      | 23      | 5.58            | 0.45     | 69.01   | 19.53  | 0.42 | 0.00               | 1.34 | 0.18 |
| 10 - Z Almourssa et al        | 0      | 1       | 1      | 9       | 1.89            | 0.05     | 72.02   | 9.31   |      |                    |      |      |
| 143 - M Riollano-Cruz et al   | 1      | 1       | 2      | 14      | 15.00           | 0.46     | 485.32  | 10.22  |      |                    |      |      |
| Cardiovascular Support        |        |         |        |         |                 |          |         |        |      |                    |      |      |
| COVID-19                      | 0      | 16      | 28     | 1332    | 4.26            | 0.87     | 20.75   | 100.00 | 0.59 | 0.00               | 1.79 | 0.07 |
| 15 - JP Armann et al          | 0      | 2       | 8      | 100     | 2.18            | 0.10     | 49.12   | 25.80  |      |                    |      |      |
| 170 - B Yayla et al           | 0      | 1       | 0      | 76      | 0.00            | 0.00     | 0.00    | 0.00   |      |                    |      |      |
| 28 - H Cairoli                | 0      | 6       | 1      | 572     | 29.31           | 1.09     | 788.80  | 23.12  |      |                    |      |      |
| 79 - F Gotzinger et al        | 0      | 7       | 19     | 575     | 1.90            | 0.10     | 34.51   | 29.84  |      |                    |      |      |
| PIMS-TS/MIS-C                 | 1      | 1       | 4      | 9       | 3.67            | 0.12     | 113.73  | 21.25  | 1.00 | 0.00               | 0.74 | 0.46 |
| 10 - Z Almourssa et al        | 1      | 1       | 4      | 9       | 3.67            | 0.12     | 113.73  | 21.25  |      |                    |      |      |
| Admission to Critical Care    |        |         |        |         |                 |          |         |        |      |                    |      |      |
| COVID-19                      | 9      | 55      | 168    | 2527    | 3.06            | 1.26     | 7.41    | 91.19  | 0.29 | 17.65              | 2.47 | 0.01 |
| 157 - O Swann et al           | 4      | 24      | 74     | 556     | 1.30            | 0.43     | 3.92    | 38.13  |      |                    |      |      |
| 163 - S Verma et al           | 1      | 1       | 22     | 81      | 7.93            | 0.31     | 201.99  | 4.99   |      |                    |      |      |
| 170 - B Yayla et al           | 0      | 1       | 1      | 76      | 16.78           | 0.47     | 605.19  | 4.08   |      |                    |      |      |

| Name                          | Events |         | Events |         | Effect   |          |         | Weight | P(Q) | I <sup>2</sup> (Q) | Z    | P(Z) |
|-------------------------------|--------|---------|--------|---------|----------|----------|---------|--------|------|--------------------|------|------|
|                               | 1      | Total 1 | 2      | Total 2 | Estimate | CI Start | CI End  |        |      |                    |      |      |
| 21 - D Bayesheva et al        | 0      | 3       | 4      | 549     | 17.32    | 0.78     | 386.35  | 5.41   |      |                    |      |      |
| 224 - Graff et al             | 4      | 9       | 7      | 57      | 5.71     | 1.23     | 26.50   | 20.96  |      |                    |      |      |
| 28 - H Cairoli                | 0      | 6       | 3      | 572     | 12.52    | 0.59     | 267.58  | 5.56   |      |                    |      |      |
| 79 - F Gotzinger et al        | 0      | 7       | 48     | 575     | 0.73     | 0.04     | 12.89   | 6.28   |      |                    |      |      |
| 91 - M Kainth et al           | 0      | 4       | 9      | 61      | 0.61     | 0.03     | 12.36   | 5.78   |      |                    |      |      |
| PIMS-TS/MIS-C                 | 2      | 2       | 29     | 41      | 0.98     | 0.09     | 11.17   | 8.81   | 0.66 | 0.00               | 0.02 | 0.98 |
| 10 - Z Almooussa et al        | 1      | 1       | 8      | 9       | 0.53     | 0.01     | 20.19   | 3.96   |      |                    |      |      |
| 5 - N Abdel-Haq et al         | 1      | 1       | 21     | 32      | 1.60     | 0.06     | 42.63   | 4.86   |      |                    |      |      |
| Death                         | 0      | 20      | 9      | 1886    | 10.25    | 2.31     | 45.43   | 100.00 | 0.95 | 0.00               | 3.06 | 0.00 |
| COVID-19                      | 0      | 19      | 8      | 1872    | 13.17    | 2.57     | 67.45   | 83.06  | 0.99 | 0.00               | 3.09 | 0.00 |
| 15 - JP Armann et al          | 0      | 2       | 1      | 100     | 13.27    | 0.43     | 412.87  | 18.76  |      |                    |      |      |
| 170 - B Yayla et al           | 0      | 1       | 1      | 76      | 16.78    | 0.47     | 605.19  | 17.24  |      |                    |      |      |
| 21 - D Bayesheva et al        | 0      | 3       | 0      | 549     | 0.00     | 0.00     | 0.00    | 0.00   |      |                    |      |      |
| 28 - H Cairoli                | 0      | 6       | 2      | 572     | 17.55    | 0.76     | 402.83  | 22.58  |      |                    |      |      |
| 79 - F Gotzinger et al        | 0      | 7       | 4      | 575     | 8.47     | 0.42     | 171.64  | 24.48  |      |                    |      |      |
| PIMS-TS/MIS-C                 | 0      | 1       | 1      | 14      | 3.00     | 0.08     | 111.78  | 16.94  | 1.00 | 0.00               | 0.60 | 0.55 |
| 143 - M Riollano-Cruz et al   | 0      | 1       | 1      | 14      | 3.00     | 0.08     | 111.78  | 16.94  |      |                    |      |      |
| CKD                           |        |         |        |         |          |          |         |        |      |                    |      |      |
| Invasive Ventilation          | 32     | 145     | 767    | 8825    | 8.81     | 2.52     | 30.79   | 100.00 | 0.03 | 53.60              | 3.41 | 0.00 |
| COVID-19                      | 32     | 144     | 765    | 8812    | 10.90    | 2.72     | 43.74   | 91.16  | 0.02 | 59.74              | 3.37 | 0.00 |
| 151 - B Sousa et al           | 28     | 119     | 727    | 6817    | 2.58     | 1.68     | 3.96    | 27.12  |      |                    |      |      |
| 15 - JP Armann et al          | 3      | 5       | 3      | 97      | 47.00    | 5.60     | 394.17  | 15.48  |      |                    |      |      |
| 21 - D Bayesheva et al        | 0      | 3       | 1      | 549     | 52.24    | 1.80     | 1517.10 | 9.24   |      |                    |      |      |
| 28 - H Cairoli                | 0      | 5       | 1      | 575     | 34.82    | 1.27     | 952.48  | 9.46   |      |                    |      |      |
| 67 - G Fislser et al          | 1      | 1       | 7      | 76      | 27.80    | 1.04     | 744.79  | 9.54   |      |                    |      |      |
| 75 - V Giacomet et al         | 0      | 2       | 1      | 125     | 16.60    | 0.53     | 516.03  | 9.00   |      |                    |      |      |
| 79 - F Gotzinger et al        | 0      | 9       | 25     | 573     | 1.13     | 0.06     | 19.99   | 11.32  |      |                    |      |      |
| PIMS-TS/MIS-C                 | 0      | 1       | 2      | 13      | 1.53     | 0.05     | 49.80   | 8.84   | 1.00 | 0.00               | 0.24 | 0.81 |
| 13 - AR Araujo da Silva et al | 0      | 1       | 2      | 13      | 1.53     | 0.05     | 49.80   | 8.84   |      |                    |      |      |
| Cardiovascular Support        | 0      | 19      | 28     | 1243    | 3.30     | 0.35     | 31.32   | 100.00 | 0.20 | 38.78              | 1.04 | 0.30 |



| Name                               | Events |         | Events |         | Effect Estimate | CI Start | CI End | Weight | P(Q) | I <sup>2</sup> (Q) | Z    | P(Z) |
|------------------------------------|--------|---------|--------|---------|-----------------|----------|--------|--------|------|--------------------|------|------|
|                                    | 1      | Total 1 | 2      | Total 2 |                 |          |        |        |      |                    |      |      |
| COVID-19                           | 0      | 19      | 28     | 1243    | 3.30            | 0.35     | 31.32  | 100.00 | 0.20 | 38.78              | 1.04 | 0.30 |
| 15 - JP Armann et al               | 0      | 5       | 8      | 97      | 0.96            | 0.05     | 18.83  | 34.27  |      |                    |      |      |
| 28 - H Cairoli                     | 0      | 5       | 1      | 573     | 34.70           | 1.27     | 949.17 | 30.05  |      |                    |      |      |
| 79 - F Gotzinger et al             | 0      | 9       | 19     | 573     | 1.50            | 0.08     | 26.65  | 35.68  |      |                    |      |      |
| PIMS-TS/MIS-C                      | 0      | 0       | 0      | 0       | 0.00            | 0.00     | 0.00   | 0.00   | 0.00 | 0.00               | 0.00 | 0.00 |
| Admission to Critical Care         | 61     | 160     | 2004   | 9388    | 2.38            | 1.58     | 3.59   | 100.00 | 0.41 | 3.21               | 4.16 | 0.00 |
| COVID-19                           | 60     | 159     | 1993   | 9375    | 2.63            | 1.58     | 4.39   | 98.63  | 0.35 | 9.85               | 3.70 | 0.00 |
| 151 - B Sousa et al                | 51     | 119     | 1816   | 6817    | 2.07            | 1.43     | 2.98   | 73.79  |      |                    |      |      |
| 157 - O Swann et al                | 2      | 14      | 76     | 566     | 1.07            | 0.24     | 4.90   | 7.01   |      |                    |      |      |
| 15 - JP Armann et al               | 3      | 5       | 12     | 97      | 10.63           | 1.61     | 70.23  | 4.58   |      |                    |      |      |
| 21 - D Bayesheva et al             | 0      | 3       | 4      | 549     | 17.32           | 0.78     | 386.35 | 1.72   |      |                    |      |      |
| 28 - H Cairoli                     | 0      | 5       | 3      | 573     | 14.82           | 0.68     | 322.38 | 1.75   |      |                    |      |      |
| 67 - G Fisler et al                | 2      | 2       | 28     | 75      | 8.33            | 0.39     | 179.82 | 1.76   |      |                    |      |      |
| 75 - V Giacomet et al              | 0      | 2       | 8      | 125     | 2.76            | 0.12     | 62.31  | 1.71   |      |                    |      |      |
| 79 - F Gotzinger et al             | 2      | 9       | 46     | 573     | 3.27            | 0.66     | 16.21  | 6.32   |      |                    |      |      |
| PIMS-TS/MIS-C                      | 1      | 1       | 11     | 13      | 0.65            | 0.02     | 21.18  | 1.37   | 1.00 | 0.00               | 0.24 | 0.81 |
| 13 - AR Araujo da Silva et al      | 1      | 1       | 11     | 13      | 0.65            | 0.02     | 21.18  | 1.37   |      |                    |      |      |
| Death                              | 28     | 142     | 553    | 8622    | 3.72            | 2.44     | 5.67   | 100.00 | 0.70 | 0.00               | 6.12 | 0.00 |
| COVID-19                           | 28     | 141     | 553    | 8609    | 3.72            | 2.44     | 5.67   | 100.00 | 0.70 | 0.00               | 6.12 | 0.00 |
| 151 - B Sousa et al                | 28     | 119     | 546    | 6817    | 3.53            | 2.29     | 5.45   | 94.63  |      |                    |      |      |
| 15 - JP Armann et al               | 0      | 5       | 1      | 97      | 5.85            | 0.21     | 160.79 | 1.61   |      |                    |      |      |
| 21 - D Bayesheva et al             | 0      | 3       | 0      | 549     | 0.00            | 0.00     | 0.00   | 0.00   |      |                    |      |      |
| 28 - H Cairoli                     | 0      | 5       | 2      | 573     | 20.78           | 0.89     | 485.13 | 1.78   |      |                    |      |      |
| 79 - F Gotzinger et al             | 0      | 9       | 4      | 573     | 6.66            | 0.33     | 132.62 | 1.98   |      |                    |      |      |
| PIMS-TS/MIS-C                      | 0      | 1       | 0      | 13      | 0.00            | 0.00     | 0.00   | 0.00   | 0.00 | 0.00               | 0.00 | 0.00 |
| 13 - AR Araujo da Silva et al      | 0      | 1       | 0      | 13      | 0.00            | 0.00     | 0.00   | 0.00   |      |                    |      |      |
| Age 0 - <1 year and severe outcome |        |         |        |         |                 |          |        |        |      |                    |      |      |
| Invasive Ventilation               | 340    | 3439    | 175    | 2482    | 0.99            | 0.56     | 1.75   | 100.00 | 0.01 | 51.30              | 0.04 | 0.97 |
| COVID-19                           | 338    | 3433    | 168    | 2443    | 0.91            | 0.51     | 1.63   | 94.96  | 0.01 | 53.98              | 0.32 | 0.75 |
| 12 - OY Antunez-Montes et al       | 8      | 138     | 2      | 153     | 4.65            | 0.97     | 22.27  | 8.49   |      |                    |      |      |

| Name                          | Events |         | Events |         | Effect   |          |          | Weight | P(Q) | I <sup>2</sup> (Q) | Z    | P(Z) |
|-------------------------------|--------|---------|--------|---------|----------|----------|----------|--------|------|--------------------|------|------|
|                               | 1      | Total 1 | 2      | Total 2 | Estimate | CI Start | CI End   |        |      |                    |      |      |
| 13 - AR Araujo da Silva et al | 0      | 11      | 1      | 13      | 0.36     | 0.01     | 9.82     | 2.67   |      |                    |      |      |
| 142 - S Richardson et al      | 7      | 53      | 1      | 6       | 0.76     | 0.08     | 7.51     | 4.94   |      |                    |      |      |
| 151 - B Sousa et al           | 267    | 1957    | 119    | 1499    | 1.83     | 1.46     | 2.30     | 22.39  |      |                    |      |      |
| 155 - Kyung Sung              | 0      | 1       | 0      | 8       | 0.00     | 0.00     | 0.00     | 0.00   |      |                    |      |      |
| 15 - JP Armann et al          | 1      | 36      | 3      | 28      | 0.24     | 0.02     | 2.42     | 4.83   |      |                    |      |      |
| 163 - S Verma et al           | 1      | 33      | 1      | 9       | 0.25     | 0.01     | 4.44     | 3.39   |      |                    |      |      |
| 21 - D Bayesheva et al        | 0      | 100     | 0      | 137     | 0.00     | 0.00     | 0.00     | 0.00   |      |                    |      |      |
| 221 - Preston et al           | 43     | 632     | 22     | 245     | 0.74     | 0.43     | 1.27     | 19.29  |      |                    |      |      |
| 28 - H Cairoli                | 0      | 189     | 1      | 108     | 0.19     | 0.01     | 4.68     | 2.81   |      |                    |      |      |
| 46 - M Ceano-Vivas et al      | 1      | 15      | 0      | 2       | 0.52     | 0.02     | 16.63    | 2.44   |      |                    |      |      |
| 54 - A Desai et al            | 7      | 69      | 13     | 109     | 0.83     | 0.32     | 2.21     | 13.92  |      |                    |      |      |
| 58 - H Du et al               | 1      | 30      | 1      | 58      | 1.97     | 0.12     | 32.57    | 3.54   |      |                    |      |      |
| 72 - S Garazzino et al        | 2      | 52      | 0      | 24      | 2.43     | 0.11     | 52.49    | 3.03   |      |                    |      |      |
| 75 - V Giacomet et al         | 0      | 56      | 0      | 20      | 0.00     | 0.00     | 0.00     | 0.00   |      |                    |      |      |
| 99 - A Kambhampati            | 0      | 61      | 4      | 24      | 0.04     | 0.00     | 0.72     | 3.22   |      |                    |      |      |
| PIMS-TS/MIS-C                 | 2      | 6       | 7      | 39      | 4.58     | 0.20     | 106.62   | 5.04   | 0.20 | 40.38              | 0.95 | 0.34 |
| 12 - OY Antunez-Montes et al  | 2      | 2       | 6      | 31      | 19.62    | 0.84     | 460.56   | 2.89   |      |                    |      |      |
| 13 - AR Araujo da Silva et al | 0      | 2       | 0      | 4       | 0.00     | 0.00     | 0.00     | 0.00   |      |                    |      |      |
| 187 - R Carbajal et al        | 0      | 1       | 0      | 0       | 0.00     | 0.00     | 0.00     | 0.00   |      |                    |      |      |
| 89 - S Jain et al             | 0      | 1       | 1      | 4       | 0.78     | 0.02     | 32.37    | 2.15   |      |                    |      |      |
| Cardiovascular Support        | 9      | 609     | 13     | 510     | 0.76     | 0.08     | 7.64     | 100.00 | 0.00 | 74.67              | 0.24 | 0.81 |
| COVID-19                      | 3      | 467     | 5      | 471     | 1.53     | 0.03     | 80.51    | 62.71  | 0.00 | 81.55              | 0.21 | 0.83 |
| 12 - OY Antunez-Montes et al  | 2      | 2       | 0      | 153     | 1535.00  | 25.08    | 93956.13 | 13.61  |      |                    |      |      |
| 13 - AR Araujo da Silva et al | 0      | 11      | 0      | 13      | 0.00     | 0.00     | 0.00     | 0.00   |      |                    |      |      |
| 142 - S Richardson et al      | 0      | 53      | 0      | 6       | 0.00     | 0.00     | 0.00     | 0.00   |      |                    |      |      |
| 15 - JP Armann et al          | 0      | 36      | 4      | 28      | 0.07     | 0.00     | 1.45     | 17.17  |      |                    |      |      |
| 21 - D Bayesheva et al        | 0      | 100     | 0      | 137     | 0.00     | 0.00     | 0.00     | 0.00   |      |                    |      |      |
| 28 - H Cairoli                | 0      | 189     | 1      | 108     | 0.19     | 0.01     | 4.68     | 16.38  |      |                    |      |      |
| 46 - M Ceano-Vivas et al      | 1      | 15      | 0      | 2       | 0.52     | 0.02     | 16.63    | 15.55  |      |                    |      |      |
| 99 - A Kambhampati            | 0      | 61      | 0      | 24      | 0.00     | 0.00     | 0.00     | 0.00   |      |                    |      |      |

| Name                           | Events |         | Events |         | Effect Estimate | CI Start | CI End | Weight | P(Q) | I <sup>2</sup> (Q) | Z    | P(Z) |
|--------------------------------|--------|---------|--------|---------|-----------------|----------|--------|--------|------|--------------------|------|------|
|                                | 1      | Total 1 | 2      | Total 2 |                 |          |        |        |      |                    |      |      |
| PIMS-TS/MIS-C                  | 6      | 142     | 8      | 39      | 0.18            | 0.06     | 0.55   | 37.29  | 0.42 | 0.00               | 3.00 | 0.00 |
| 12 - OY Antunez-Montes et al   | 6      | 138     | 7      | 31      | 0.16            | 0.05     | 0.50   | 22.54  |      |                    |      |      |
| 13 - AR Araujo da Silva et al  | 0      | 2       | 0      | 4       | 0.00            | 0.00     | 0.00   | 0.00   |      |                    |      |      |
| 187 - R Carbajal et al         | 0      | 1       | 0      | 0       | 0.00            | 0.00     | 0.00   | 0.00   |      |                    |      |      |
| 89 - S Jain et al              | 0      | 1       | 1      | 4       | 0.78            | 0.02     | 32.37  | 14.75  |      |                    |      |      |
| Admission to Critical Care     | 947    | 4162    | 523    | 2727    | 1.15            | 0.72     | 1.85   | 100.00 | 0.00 | 72.38              | 0.60 | 0.55 |
| COVID-19                       | 935    | 4144    | 499    | 2665    | 1.11            | 0.67     | 1.83   | 91.00  | 0.00 | 76.20              | 0.40 | 0.69 |
| 12 - OY Antunez-Montes et al   | 16     | 138     | 0      | 153     | 41.35           | 2.46     | 696.17 | 2.19   |      |                    |      |      |
| 136 - G Qian et al             | 5      | 28      | 1      | 16      | 3.26            | 0.35     | 30.73  | 3.07   |      |                    |      |      |
| 13 - AR Araujo da Silva et al  | 6      | 11      | 0      | 13      | 31.91           | 1.52     | 668.75 | 1.94   |      |                    |      |      |
| 142 - S Richardson et al       | 17     | 53      | 3      | 6       | 0.47            | 0.09     | 2.59   | 4.36   |      |                    |      |      |
| 151 - B Sousa et al            | 626    | 1957    | 342    | 1499    | 1.59            | 1.36     | 1.86   | 9.88   |      |                    |      |      |
| 153 - P Storch de Gracia et al | 2      | 12      | 1      | 5       | 0.80            | 0.06     | 11.50  | 2.39   |      |                    |      |      |
| 155 - Kyung Sung               | 0      | 1       | 0      | 8       | 0.00            | 0.00     | 0.00   | 0.00   |      |                    |      |      |
| 157 - O Swann et al            | 31     | 217     | 15     | 89      | 0.82            | 0.42     | 1.61   | 8.31   |      |                    |      |      |
| 15 - JP Armann et al           | 3      | 36      | 4      | 28      | 0.55            | 0.11     | 2.67   | 4.70   |      |                    |      |      |
| 162 - MM van der Zalm et al    | 5      | 30      | 3      | 21      | 1.20            | 0.25     | 5.68   | 4.80   |      |                    |      |      |
| 163 - S Verma et al            | 7      | 33      | 1      | 9       | 2.15            | 0.23     | 20.23  | 3.08   |      |                    |      |      |
| 19 - S Bellino et al           | 5      | 193     | 8      | 84      | 0.25            | 0.08     | 0.80   | 6.28   |      |                    |      |      |
| 21 - D Bayesheva et al         | 0      | 100     | 1      | 137     | 0.45            | 0.02     | 11.23  | 1.78   |      |                    |      |      |
| 221 - Preston et al            | 152    | 632     | 103    | 245     | 0.44            | 0.32     | 0.60   | 9.57   |      |                    |      |      |
| 224 - Graff et al              | 1      | 15      | 0      | 10      | 2.17            | 0.08     | 58.76  | 1.70   |      |                    |      |      |
| 26 - CE Bolaños-Almeida et al  | 7      | 58      | 2      | 103     | 6.93            | 1.39     | 34.58  | 4.64   |      |                    |      |      |
| 28 - H Cairoli                 | 0      | 189     | 1      | 108     | 0.19            | 0.01     | 4.68   | 1.78   |      |                    |      |      |
| 2 - Centre for Disease Control | 5      | 60      | 0      | 15      | 3.07            | 0.16     | 58.65  | 2.04   |      |                    |      |      |
| 46 - M Ceano-Vivas et al       | 2      | 15      | 0      | 2       | 0.93            | 0.03     | 25.68  | 1.68   |      |                    |      |      |
| 75 - V Giacomet et al          | 3      | 56      | 1      | 20      | 1.08            | 0.11     | 10.98  | 2.93   |      |                    |      |      |
| 79 - F Gotzinger et al         | 23     | 230     | 2      | 62      | 3.33            | 0.76     | 14.54  | 5.07   |      |                    |      |      |
| 91 - M Kainth et al            | 0      | 19      | 2      | 8       | 0.07            | 0.00     | 1.58   | 1.83   |      |                    |      |      |
| 99 - A Kambhampati             | 19     | 61      | 9      | 24      | 0.75            | 0.28     | 2.03   | 6.95   |      |                    |      |      |

| Name                          | Events |         | Events |         | Effect   |          |        | Weight | P(Q) | I <sup>2</sup> (Q) | Z    | P(Z) |
|-------------------------------|--------|---------|--------|---------|----------|----------|--------|--------|------|--------------------|------|------|
|                               | 1      | Total 1 | 2      | Total 2 | Estimate | CI Start | CI End |        |      |                    |      |      |
| PIMS-TS/MIS-C                 | 12     | 18      | 24     | 62      | 1.77     | 0.45     | 6.94   | 9.00   | 0.58 | 0.00               | 0.82 | 0.41 |
| 12 - OY Antunez-Montes et al  | 2      | 2       | 11     | 31      | 8.91     | 0.39     | 202.06 | 1.87   |      |                    |      |      |
| 13 - AR Araujo da Silva et al | 2      | 2       | 3      | 4       | 2.14     | 0.06     | 77.54  | 1.48   |      |                    |      |      |
| 179 - J Pang et al            | 4      | 5       | 0      | 0       | 0.00     | 0.00     | 0.00   | 0.00   |      |                    |      |      |
| 187 - R Carbajal et al        | 1      | 1       | 0      | 0       | 0.00     | 0.00     | 0.00   | 0.00   |      |                    |      |      |
| 38 - BC Clark et al           | 2      | 4       | 6      | 17      | 1.83     | 0.20     | 16.51  | 3.16   |      |                    |      |      |
| 5 - N Abdel-Haq et al         | 1      | 4       | 4      | 10      | 0.50     | 0.04     | 6.68   | 2.49   |      |                    |      |      |
| Death                         | 399    | 4380    | 209    | 4272    | 2.10     | 1.54     | 2.85   | 100.00 | 0.24 | 20.42              | 4.73 | 0.00 |
| COVID-19                      | 398    | 4375    | 207    | 4237    | 2.07     | 1.54     | 2.78   | 99.05  | 0.26 | 19.42              | 4.84 | 0.00 |
| 12 - OY Antunez-Montes et al  | 3      | 138     | 0      | 153     | 7.93     | 0.41     | 154.91 | 1.05   |      |                    |      |      |
| 13 - AR Araujo da Silva et al | 0      | 11      | 0      | 13      | 0.00     | 0.00     | 0.00   | 0.00   |      |                    |      |      |
| 142 - S Richardson et al      | 0      | 53      | 1      | 6       | 0.03     | 0.00     | 0.95   | 0.84   |      |                    |      |      |
| 151 - B Sousa et al           | 181    | 1957    | 67     | 1499    | 2.18     | 1.63     | 2.91   | 38.44  |      |                    |      |      |
| 155 - Kyung Sung              | 0      | 1       | 0      | 8       | 0.00     | 0.00     | 0.00   | 0.00   |      |                    |      |      |
| 157 - O Swann et al           | 3      | 217     | 0      | 89      | 2.92     | 0.15     | 57.13  | 1.05   |      |                    |      |      |
| 15 - JP Armann et al          | 0      | 36      | 1      | 28      | 0.25     | 0.01     | 6.40   | 0.88   |      |                    |      |      |
| 21 - D Bayesheva et al        | 0      | 100     | 0      | 137     | 0.00     | 0.00     | 0.00   | 0.00   |      |                    |      |      |
| 227 - Sena et al              | 15     | 111     | 6      | 67      | 1.59     | 0.58     | 4.32   | 8.11   |      |                    |      |      |
| 26 - CE Bolaños-Almeida et al | 3      | 58      | 2      | 103     | 2.75     | 0.45     | 16.99  | 2.71   |      |                    |      |      |
| 28 - H Cairoli                | 0      | 189     | 1      | 108     | 0.19     | 0.01     | 4.68   | 0.90   |      |                    |      |      |
| 46 - M Ceano-Vivas et al      | 1      | 15      | 0      | 2       | 0.52     | 0.02     | 16.63  | 0.77   |      |                    |      |      |
| 58 - H Du et al               | 1      | 30      | 0      | 58      | 5.95     | 0.24     | 150.55 | 0.89   |      |                    |      |      |
| 75 - V Giacomet et al         | 0      | 56      | 0      | 20      | 0.00     | 0.00     | 0.00   | 0.00   |      |                    |      |      |
| 86 - D Hillesheim et al       | 191    | 1341    | 129    | 1918    | 2.30     | 1.82     | 2.91   | 43.41  |      |                    |      |      |
| 89 - S Jain et al             | 0      | 1       | 0      | 4       | 0.00     | 0.00     | 0.00   | 0.00   |      |                    |      |      |
| 99 - A Kambhampati            | 0      | 61      | 0      | 24      | 0.00     | 0.00     | 0.00   | 0.00   |      |                    |      |      |
| PIMS-TS/MIS-C                 | 1      | 5       | 2      | 35      | 14.50    | 0.64     | 328.46 | 0.95   | 1.00 | 0.00               | 1.68 | 0.09 |
| 12 - OY Antunez-Montes et al  | 1      | 2       | 2      | 31      | 14.50    | 0.64     | 328.46 | 0.95   |      |                    |      |      |
| 13 - AR Araujo da Silva et al | 0      | 2       | 0      | 4       | 0.00     | 0.00     | 0.00   | 0.00   |      |                    |      |      |
| 187 - R Carbajal et al        | 0      | 1       | 0      | 0       | 0.00     | 0.00     | 0.00   | 0.00   |      |                    |      |      |

| Name                          | Events |         | Events |         | Effect Estimate | CI Start | CI End | Weight | P(Q) | I <sup>2</sup> (Q) | Z    | P(Z) |
|-------------------------------|--------|---------|--------|---------|-----------------|----------|--------|--------|------|--------------------|------|------|
|                               | 1      | Total 1 | 2      | Total 2 |                 |          |        |        |      |                    |      |      |
| Age 5-9 years                 |        |         |        |         |                 |          |        |        |      |                    |      |      |
| Invasive Ventilation          | 134    | 1846    | 170    | 2454    | 1.05            | 0.82     | 1.34   | 100.00 | 0.96 | 0.00               | 0.39 | 0.70 |
| COVID-19                      | 111    | 1770    | 163    | 2410    | 0.99            | 0.77     | 1.28   | 92.50  | 0.89 | 0.00               | 0.06 | 0.95 |
| 12 - OY Antunez-Montes et al  | 0      | 128     | 2      | 153     | 0.24            | 0.01     | 4.96   | 0.66   |      |                    |      |      |
| 13 - AR Araujo da Silva et al | 3      | 12      | 1      | 13      | 4.00            | 0.35     | 45.10  | 1.04   |      |                    |      |      |
| 142 - S Richardson et al      | 1      | 6       | 1      | 6       | 1.00            | 0.05     | 20.83  | 0.66   |      |                    |      |      |
| 151 - B Sousa et al           | 81     | 964     | 119    | 1499    | 1.06            | 0.79     | 1.43   | 69.97  |      |                    |      |      |
| 155 - Kyung Sung              | 0      | 12      | 0      | 8       | 0.00            | 0.00     | 0.00   | 0.00   |      |                    |      |      |
| 15 - JP Armann et al          | 1      | 12      | 3      | 28      | 0.76            | 0.07     | 8.12   | 1.08   |      |                    |      |      |
| 187 - R Carbajal et al        | 2      | 4       | 0      | 0       | 0.00            | 0.00     | 0.00   | 0.00   |      |                    |      |      |
| 21 - D Bayesheva et al        | 0      | 128     | 0      | 137     | 0.00            | 0.00     | 0.00   | 0.00   |      |                    |      |      |
| 221 - Preston et al           | 20     | 274     | 22     | 245     | 0.80            | 0.42     | 1.50   | 15.23  |      |                    |      |      |
| 28 - H Cairoli                | 0      | 109     | 1      | 108     | 0.33            | 0.01     | 8.12   | 0.59   |      |                    |      |      |
| 46 - M Ceano-Vivas et al      | 0      | 4       | 0      | 2       | 0.00            | 0.00     | 0.00   | 0.00   |      |                    |      |      |
| 54 - A Desai et al            | 2      | 26      | 13     | 109     | 0.62            | 0.13     | 2.91   | 2.51   |      |                    |      |      |
| 58 - H Du et al               | 1      | 54      | 1      | 58      | 1.08            | 0.07     | 17.63  | 0.78   |      |                    |      |      |
| 72 - S Garazzino et al        | 0      | 13      | 0      | 24      | 0.00            | 0.00     | 0.00   | 0.00   |      |                    |      |      |
| 75 - V Giacomet et al         | 0      | 24      | 0      | 20      | 0.00            | 0.00     | 0.00   | 0.00   |      |                    |      |      |
| PIMS-TS/MIS-C                 | 23     | 76      | 7      | 44      | 2.11            | 0.86     | 5.19   | 7.50   | 1.00 | 0.00               | 1.62 | 0.10 |
| 10 - Z Almoussa et al         | 1      | 4       | 0      | 0       | 0.00            | 0.00     | 0.00   | 0.00   |      |                    |      |      |
| 12 - OY Antunez-Montes et al  | 11     | 33      | 6      | 31      | 2.08            | 0.66     | 6.57   | 4.61   |      |                    |      |      |
| 13 - AR Araujo da Silva et al | 1      | 6       | 0      | 4       | 2.45            | 0.08     | 76.13  | 0.52   |      |                    |      |      |
| 143 - M Riollano-Cruz et al   | 1      | 3       | 0      | 1       | 1.80            | 0.04     | 79.42  | 0.42   |      |                    |      |      |
| 147 - L Shahbaznejad et al    | 1      | 4       | 0      | 0       | 0.00            | 0.00     | 0.00   | 0.00   |      |                    |      |      |
| 183 - Rekhtman et al          | 2      | 6       | 0      | 2       | 2.78            | 0.09     | 83.84  | 0.52   |      |                    |      |      |
| 228 - Hasan et al             | 1      | 5       | 0      | 2       | 1.67            | 0.05     | 58.28  | 0.48   |      |                    |      |      |
| 41 - RL Crawford et al        | 0      | 3       | 0      | 0       | 0.00            | 0.00     | 0.00   | 0.00   |      |                    |      |      |
| 89 - S Jain et al             | 5      | 12      | 1      | 4       | 2.14            | 0.17     | 27.10  | 0.94   |      |                    |      |      |
| Cardiovascular Support        | 31     | 340     | 15     | 356     | 1.53            | 0.70     | 3.36   | 100.00 | 0.81 | 0.00               | 1.07 | 0.29 |
| COVID-19                      | 3      | 271     | 5      | 310     | 1.35            | 0.31     | 6.01   | 27.76  | 0.32 | 0.00               | 0.40 | 0.69 |

| Name                           | Events |         | Events |         | Effect   |          |        | Weight | P(Q) | I <sup>2</sup> (Q) | Z    | P(Z) |
|--------------------------------|--------|---------|--------|---------|----------|----------|--------|--------|------|--------------------|------|------|
|                                | 1      | Total 1 | 2      | Total 2 | Estimate | CI Start | CI End |        |      |                    |      |      |
| 12 - OY Antunez-Montes et al   | 0      | 128     | 0      | 153     | 0.00     | 0.00     | 0.00   | 0.00   |      |                    |      |      |
| 13 - AR Araujo da Silva et al  | 0      | 12      | 0      | 13      | 0.00     | 0.00     | 0.00   | 0.00   |      |                    |      |      |
| 142 - S Richardson et al       | 0      | 6       | 0      | 6       | 0.00     | 0.00     | 0.00   | 0.00   |      |                    |      |      |
| 15 - JP Armann et al           | 3      | 12      | 4      | 28      | 2.00     | 0.37     | 10.75  | 21.79  |      |                    |      |      |
| 28 - H Cairoli                 | 0      | 109     | 1      | 108     | 0.33     | 0.01     | 8.12   | 5.97   |      |                    |      |      |
| 46 - M Ceano-Vivas et al       | 0      | 4       | 0      | 2       | 0.00     | 0.00     | 0.00   | 0.00   |      |                    |      |      |
| PIMS-TS/MIS-C                  | 28     | 69      | 10     | 46      | 1.61     | 0.64     | 4.05   | 72.24  | 0.74 | 0.00               | 1.01 | 0.31 |
| 10 - Z Almoussa et al          | 2      | 4       | 1      | 2       | 1.00     | 0.03     | 29.81  | 5.35   |      |                    |      |      |
| 12 - OY Antunez-Montes et al   | 9      | 33      | 7      | 31      | 1.29     | 0.41     | 4.01   | 47.55  |      |                    |      |      |
| 13 - AR Araujo da Silva et al  | 0      | 6       | 0      | 4       | 0.00     | 0.00     | 0.00   | 0.00   |      |                    |      |      |
| 143 - M Riollano-Cruz et al    | 1      | 3       | 0      | 1       | 1.80     | 0.04     | 79.42  | 4.30   |      |                    |      |      |
| 147 - L Shahbaznejad et al     | 1      | 4       | 1      | 4       | 1.00     | 0.04     | 24.55  | 6.02   |      |                    |      |      |
| 187 - R Carbajal et al         | 4      | 4       | 0      | 0       | 0.00     | 0.00     | 0.00   | 0.00   |      |                    |      |      |
| 41 - RL Crawford et al         | 2      | 3       | 0      | 0       | 0.00     | 0.00     | 0.00   | 0.00   |      |                    |      |      |
| 89 - S Jain et al              | 9      | 12      | 1      | 4       | 9.00     | 0.66     | 122.79 | 9.02   |      |                    |      |      |
| Admission to Critical Care     | 1119   | 3335    | 911    | 3582    | 1.46     | 1.19     | 1.78   | 100.00 | 0.13 | 22.17              | 3.68 | 0.00 |
| COVID-19                       | 437    | 2184    | 508    | 2682    | 1.17     | 1.00     | 1.36   | 56.90  | 0.63 | 0.00               | 1.97 | 0.05 |
| 100 - M Korkomaz et al         | 0      | 24      | 2      | 20      | 0.15     | 0.01     | 3.34   | 0.41   |      |                    |      |      |
| 12 - OY Antunez-Montes et al   | 6      | 128     | 3      | 153     | 2.46     | 0.60     | 10.04  | 1.88   |      |                    |      |      |
| 136 - G Qian et al             | 1      | 45      | 1      | 16      | 0.34     | 0.02     | 5.79   | 0.49   |      |                    |      |      |
| 13 - AR Araujo da Silva et al  | 7      | 12      | 6      | 13      | 1.63     | 0.34     | 7.95   | 1.51   |      |                    |      |      |
| 142 - S Richardson et al       | 2      | 6       | 3      | 6       | 0.50     | 0.05     | 5.15   | 0.72   |      |                    |      |      |
| 151 - B Sousa et al            | 243    | 964     | 342    | 1499    | 1.14     | 0.94     | 1.38   | 20.73  |      |                    |      |      |
| 153 - P Storch de Gracia et al | 6      | 9       | 1      | 5       | 8.00     | 0.60     | 106.94 | 0.58   |      |                    |      |      |
| 155 - Kyung Sung               | 0      | 12      | 0      | 8       | 0.00     | 0.00     | 0.00   | 0.00   |      |                    |      |      |
| 157 - O Swann et al            | 18     | 73      | 15     | 89      | 1.61     | 0.75     | 3.48   | 5.35   |      |                    |      |      |
| 15 - JP Armann et al           | 4      | 12      | 4      | 28      | 3.00     | 0.61     | 14.86  | 1.48   |      |                    |      |      |
| 162 - MM van der Zalm et al    | 3      | 11      | 3      | 21      | 2.25     | 0.37     | 13.67  | 1.18   |      |                    |      |      |
| 187 - R Carbajal et al         | 4      | 4       | 0      | 0       | 0.00     | 0.00     | 0.00   | 0.00   |      |                    |      |      |
| 19 - S Bellino et al           | 1      | 97      | 8      | 84      | 0.10     | 0.01     | 0.81   | 0.88   |      |                    |      |      |

| Name                           | Events |         | Events |         | Effect   |          |         | Weight | P(Q) | I <sup>2</sup> (Q) | Z    | P(Z) |
|--------------------------------|--------|---------|--------|---------|----------|----------|---------|--------|------|--------------------|------|------|
|                                | 1      | Total 1 | 2      | Total 2 | Estimate | CI Start | CI End  |        |      |                    |      |      |
| 21 - D Bayesheva et al         | 1      | 128     | 1      | 137     | 1.07     | 0.07     | 17.30   | 0.51   |      |                    |      |      |
| 221 - Preston et al            | 119    | 274     | 103    | 245     | 1.06     | 0.75     | 1.50    | 14.37  |      |                    |      |      |
| 224 - Graff et al              | 1      | 7       | 0      | 10      | 4.85     | 0.17     | 137.68  | 0.35   |      |                    |      |      |
| 26 - CE Bolaños-Almeida et al  | 3      | 115     | 2      | 103     | 1.35     | 0.22     | 8.26    | 1.17   |      |                    |      |      |
| 28 - H Cairoli                 | 2      | 109     | 1      | 108     | 2.00     | 0.18     | 22.39   | 0.67   |      |                    |      |      |
| 2 - Centre for Disease Control | 2      | 16      | 0      | 15      | 5.34     | 0.24     | 121.00  | 0.41   |      |                    |      |      |
| 46 - M Ceano-Vivas et al       | 1      | 4       | 0      | 2       | 2.14     | 0.06     | 77.54   | 0.31   |      |                    |      |      |
| 67 - G Fidler et al            | 2      | 9       | 8      | 30      | 0.79     | 0.13     | 4.60    | 1.22   |      |                    |      |      |
| 75 - V Giacomet et al          | 2      | 24      | 1      | 20      | 1.73     | 0.14     | 20.58   | 0.64   |      |                    |      |      |
| 79 - F Gotzinger et al         | 8      | 94      | 2      | 62      | 2.79     | 0.57     | 13.61   | 1.50   |      |                    |      |      |
| 91 - M Kainth et al            | 1      | 7       | 2      | 8       | 0.50     | 0.04     | 7.10    | 0.56   |      |                    |      |      |
| PIMS-TS/MIS-C                  | 682    | 1151    | 403    | 900     | 1.81     | 1.51     | 2.16    | 43.10  | 0.49 | 0.00               | 6.48 | 0.00 |
| 10 - Z Almooussa et al         | 4      | 4       | 2      | 2       | 0.00     | 0.00     | 0.00    | 0.00   |      |                    |      |      |
| 12 - OY Antunez-Montes et al   | 12     | 33      | 11     | 31      | 1.04     | 0.37     | 2.89    | 3.34   |      |                    |      |      |
| 13 - AR Araujo da Silva et al  | 5      | 6       | 3      | 4       | 1.67     | 0.07     | 37.73   | 0.41   |      |                    |      |      |
| 143 - M Riollano-Cruz et al    | 1      | 3       | 0      | 1       | 1.80     | 0.04     | 79.42   | 0.28   |      |                    |      |      |
| 147 - L Shahbaznejad et al     | 3      | 4       | 4      | 4       | 0.26     | 0.01     | 8.52    | 0.32   |      |                    |      |      |
| 183 - Rekhtman et al           | 2      | 6       | 1      | 2       | 0.50     | 0.02     | 12.90   | 0.37   |      |                    |      |      |
| 222 - Belay et al              | 349    | 588     | 197    | 445     | 1.84     | 1.43     | 2.36    | 18.24  |      |                    |      |      |
| 225 - Alkan et al              | 0      | 14      | 0      | 9       | 0.00     | 0.00     | 0.00    | 0.00   |      |                    |      |      |
| 226 - Abrams et al             | 278    | 456     | 175    | 373     | 1.77     | 1.34     | 2.33    | 17.10  |      |                    |      |      |
| 228 - Hasan et al              | 5      | 5       | 0      | 2       | 55.00    | 0.83     | 3650.69 | 0.23   |      |                    |      |      |
| 38 - BC Clark et al            | 9      | 15      | 6      | 17      | 2.75     | 0.66     | 11.54   | 1.81   |      |                    |      |      |
| 41 - RL Crawford et al         | 2      | 3       | 0      | 0       | 0.00     | 0.00     | 0.00    | 0.00   |      |                    |      |      |
| 5 - N Abdel-Haq et al          | 12     | 14      | 4      | 10      | 9.00     | 1.27     | 63.89   | 1.00   |      |                    |      |      |
| Death                          | 140    | 3284    | 215    | 4565    | 1.07     | 0.86     | 1.33    | 100.00 | 0.70 | 0.00               | 0.57 | 0.57 |
| COVID-19                       | 133    | 2637    | 207    | 4076    | 1.09     | 0.87     | 1.37    | 95.57  | 0.60 | 0.00               | 0.77 | 0.44 |
| 12 - OY Antunez-Montes et al   | 2      | 128     | 0      | 153     | 6.07     | 0.29     | 127.53  | 0.52   |      |                    |      |      |
| 13 - AR Araujo da Silva et al  | 1      | 12      | 0      | 13      | 3.52     | 0.13     | 95.09   | 0.45   |      |                    |      |      |
| 142 - S Richardson et al       | 0      | 6       | 1      | 6       | 0.28     | 0.01     | 8.42    | 0.42   |      |                    |      |      |

| Name                          | Events |         | Events |         | Effect   |          |        | Weight | P(Q) | I <sup>2</sup> (Q) | Z    | P(Z) |
|-------------------------------|--------|---------|--------|---------|----------|----------|--------|--------|------|--------------------|------|------|
|                               | 1      | Total 1 | 2      | Total 2 | Estimate | CI Start | CI End |        |      |                    |      |      |
| 151 - B Sousa et al           | 56     | 964     | 67     | 1499    | 1.32     | 0.92     | 1.90   | 36.60  |      |                    |      |      |
| 155 - Kyung Sung              | 0      | 12      | 0      | 8       | 0.00     | 0.00     | 0.00   | 0.00   |      |                    |      |      |
| 157 - O Swann et al           | 0      | 73      | 0      | 89      | 0.00     | 0.00     | 0.00   | 0.00   |      |                    |      |      |
| 15 - JP Armann et al          | 0      | 12      | 1      | 28      | 0.73     | 0.03     | 19.29  | 0.45   |      |                    |      |      |
| 187 - R Carbajal et al        | 0      | 4       | 0      | 0       | 0.00     | 0.00     | 0.00   | 0.00   |      |                    |      |      |
| 227 - Sena et al              | 5      | 33      | 6      | 67      | 1.82     | 0.51     | 6.45   | 3.02   |      |                    |      |      |
| 26 - CE Bolaños-Almeida et al | 0      | 115     | 2      | 103     | 0.18     | 0.01     | 3.70   | 0.52   |      |                    |      |      |
| 28 - H Cairoli                | 0      | 109     | 1      | 108     | 0.33     | 0.01     | 8.12   | 0.47   |      |                    |      |      |
| 46 - M Ceano-Vivas et al      | 0      | 4       | 0      | 2       | 0.00     | 0.00     | 0.00   | 0.00   |      |                    |      |      |
| 58 - H Du et al               | 0      | 64      | 0      | 58      | 0.00     | 0.00     | 0.00   | 0.00   |      |                    |      |      |
| 75 - V Giacomet et al         | 0      | 24      | 0      | 20      | 0.00     | 0.00     | 0.00   | 0.00   |      |                    |      |      |
| 86 - D Hillesheim et al       | 68     | 1073    | 129    | 1918    | 0.94     | 0.69     | 1.27   | 52.71  |      |                    |      |      |
| 89 - S Jain et al             | 1      | 4       | 0      | 4       | 3.86     | 0.12     | 126.73 | 0.40   |      |                    |      |      |
| PIMS-TS/MIS-C                 | 7      | 647     | 8      | 489     | 0.63     | 0.22     | 1.78   | 4.43   | 0.67 | 0.00               | 0.88 | 0.38 |
| 10 - Z Almoussa et al         | 1      | 4       | 0      | 2       | 2.14     | 0.06     | 77.54  | 0.38   |      |                    |      |      |
| 12 - OY Antunez-Montes et al  | 1      | 33      | 2      | 31      | 0.45     | 0.04     | 5.26   | 0.81   |      |                    |      |      |
| 13 - AR Araujo da Silva et al | 0      | 6       | 0      | 4       | 0.00     | 0.00     | 0.00   | 0.00   |      |                    |      |      |
| 143 - M Riollano-Cruz et al   | 1      | 3       | 0      | 1       | 1.80     | 0.04     | 79.42  | 0.34   |      |                    |      |      |
| 147 - L Shahbaznejad et al    | 1      | 4       | 0      | 4       | 3.86     | 0.12     | 126.73 | 0.40   |      |                    |      |      |
| 183 - Rekhtman et al          | 0      | 6       | 0      | 2       | 0.00     | 0.00     | 0.00   | 0.00   |      |                    |      |      |
| 222 - Belay et al             | 3      | 588     | 6      | 445     | 0.38     | 0.09     | 1.51   | 2.51   |      |                    |      |      |
| 41 - RL Crawford et al        | 0      | 3       | 0      | 0       | 0.00     | 0.00     | 0.00   | 0.00   |      |                    |      |      |
| Age 10-14 years               |        |         |        |         |          |          |        |        |      |                    |      |      |
| Invasive Ventilation          | 134    | 1424    | 157    | 2140    | 1.35     | 1.05     | 1.74   | 100.00 | 0.63 | 0.00               | 2.37 | 0.02 |
| COVID-19                      | 113    | 1332    | 146    | 2061    | 1.30     | 1.00     | 1.68   | 91.24  | 0.50 | 0.00               | 1.93 | 0.05 |
| 12 - OY Antunez-Montes et al  | 0      | 80      | 2      | 153     | 0.38     | 0.02     | 7.93   | 0.68   |      |                    |      |      |
| 13 - AR Araujo da Silva et al | 0      | 8       | 1      | 13      | 0.49     | 0.02     | 13.52  | 0.57   |      |                    |      |      |
| 142 - S Richardson et al      | 2      | 11      | 1      | 6       | 1.11     | 0.08     | 15.53  | 0.91   |      |                    |      |      |
| 151 - B Sousa et al           | 97     | 859     | 119    | 1499    | 1.48     | 1.11     | 1.96   | 79.09  |      |                    |      |      |
| 155 - Kyung Sung              | 0      | 18      | 0      | 8       | 0.00     | 0.00     | 0.00   | 0.00   |      |                    |      |      |



| Name                          | Events |         | Events |         | Effect   |          |         | Weight | P(Q) | I <sup>2</sup> (Q) | Z    | P(Z) |
|-------------------------------|--------|---------|--------|---------|----------|----------|---------|--------|------|--------------------|------|------|
|                               | 1      | Total 1 | 2      | Total 2 | Estimate | CI Start | CI End  |        |      |                    |      |      |
| 15 - JP Armann et al          | 0      | 10      | 3      | 28      | 0.35     | 0.02     | 7.32    | 0.68   |      |                    |      |      |
| 163 - S Verma et al           | 3      | 19      | 1      | 9       | 1.50     | 0.13     | 16.82   | 1.08   |      |                    |      |      |
| 28 - H Cairoli                | 0      | 101     | 1      | 108     | 0.35     | 0.01     | 8.77    | 0.61   |      |                    |      |      |
| 46 - M Ceano-Vivas et al      | 0      | 5       | 0      | 2       | 0.00     | 0.00     | 0.00    | 0.00   |      |                    |      |      |
| 54 - A Desai et al            | 2      | 32      | 13     | 109     | 0.49     | 0.11     | 2.31    | 2.64   |      |                    |      |      |
| 58 - H Du et al               | 0      | 30      | 1      | 58      | 0.63     | 0.02     | 15.90   | 0.60   |      |                    |      |      |
| 72 - S Garazzino et al        | 0      | 21      | 0      | 24      | 0.00     | 0.00     | 0.00    | 0.00   |      |                    |      |      |
| 75 - V Giacomet et al         | 1      | 15      | 0      | 20      | 4.24     | 0.16     | 111.65  | 0.59   |      |                    |      |      |
| 99 - A Kambhampati            | 8      | 123     | 4      | 24      | 0.35     | 0.10     | 1.26    | 3.78   |      |                    |      |      |
| PIMS-TS/MIS-C                 | 21     | 92      | 11     | 79      | 2.15     | 0.92     | 5.02    | 8.76   | 0.69 | 0.00               | 1.77 | 0.08 |
| 10 - Z Al moussa et al        | 0      | 4       | 0      | 2       | 0.00     | 0.00     | 0.00    | 0.00   |      |                    |      |      |
| 12 - OY Antunez-Montes et al  | 8      | 18      | 6      | 31      | 3.33     | 0.92     | 12.08   | 3.80   |      |                    |      |      |
| 13 - AR Araujo da Silva et al | 1      | 1       | 0      | 4       | 27.00    | 0.35     | 2057.98 | 0.34   |      |                    |      |      |
| 143 - M Riollano-Cruz et al   | 1      | 7       | 0      | 1       | 0.69     | 0.02     | 26.90   | 0.47   |      |                    |      |      |
| 147 - L Shahbaznejad et al    | 1      | 2       | 1      | 4       | 3.00     | 0.08     | 107.45  | 0.49   |      |                    |      |      |
| 183 - Rekhtman et al          | 3      | 10      | 0      | 2       | 2.33     | 0.09     | 62.68   | 0.58   |      |                    |      |      |
| 187 - R Carbajal et al        | 1      | 2       | 0      | 0       | 0.00     | 0.00     | 0.00    | 0.00   |      |                    |      |      |
| 60 - EM Dufort et al          | 3      | 42      | 3      | 31      | 0.72     | 0.13     | 3.82    | 2.25   |      |                    |      |      |
| 89 - S Jain et al             | 3      | 6       | 1      | 4       | 3.00     | 0.19     | 47.96   | 0.82   |      |                    |      |      |
| Cardiovascular Support        | 53     | 420     | 30     | 411     | 1.84     | 0.96     | 3.54    | 100.00 | 0.79 | 0.00               | 1.84 | 0.07 |
| COVID-19                      | 11     | 338     | 5      | 334     | 1.02     | 0.21     | 4.91    | 17.22  | 0.44 | 0.00               | 0.02 | 0.98 |
| 12 - OY Antunez-Montes et al  | 0      | 80      | 0      | 153     | 0.00     | 0.00     | 0.00    | 0.00   |      |                    |      |      |
| 13 - AR Araujo da Silva et al | 0      | 8       | 0      | 13      | 0.00     | 0.00     | 0.00    | 0.00   |      |                    |      |      |
| 142 - S Richardson et al      | 0      | 11      | 0      | 6       | 0.00     | 0.00     | 0.00    | 0.00   |      |                    |      |      |
| 15 - JP Armann et al          | 1      | 10      | 4      | 28      | 0.67     | 0.07     | 6.79    | 7.91   |      |                    |      |      |
| 28 - H Cairoli                | 0      | 101     | 1      | 108     | 0.35     | 0.01     | 8.77    | 4.13   |      |                    |      |      |
| 46 - M Ceano-Vivas et al      | 0      | 5       | 0      | 2       | 0.00     | 0.00     | 0.00    | 0.00   |      |                    |      |      |
| 99 - A Kambhampati            | 10     | 123     | 0      | 24      | 4.53     | 0.26     | 79.98   | 5.18   |      |                    |      |      |
| PIMS-TS/MIS-C                 | 42     | 82      | 25     | 77      | 2.09     | 1.02     | 4.28    | 82.78  | 0.80 | 0.00               | 2.01 | 0.04 |
| 10 - Z Al moussa et al        | 2      | 4       | 1      | 2       | 1.00     | 0.03     | 29.81   | 3.70   |      |                    |      |      |

| Name                           | Events |         | Events |         | Effect   |          |        | Weight | P(Q) | I <sup>2</sup> (Q) | Z    | P(Z) |
|--------------------------------|--------|---------|--------|---------|----------|----------|--------|--------|------|--------------------|------|------|
|                                | 1      | Total 1 | 2      | Total 2 | Estimate | CI Start | CI End |        |      |                    |      |      |
| 12 - OY Antunez-Montes et al   | 5      | 18      | 7      | 31      | 1.32     | 0.35     | 4.99   | 24.06  |      |                    |      |      |
| 13 - AR Araujo da Silva et al  | 0      | 1       | 0      | 4       | 0.00     | 0.00     | 0.00   | 0.00   |      |                    |      |      |
| 143 - M Riollano-Cruz et al    | 0      | 7       | 0      | 1       | 0.00     | 0.00     | 0.00   | 0.00   |      |                    |      |      |
| 147 - L Shahbaznejad et al     | 2      | 2       | 1      | 4       | 11.67    | 0.32     | 422.14 | 3.31   |      |                    |      |      |
| 187 - R Carbajal et al         | 1      | 2       | 0      | 0       | 0.00     | 0.00     | 0.00   | 0.00   |      |                    |      |      |
| 60 - EM Dufort et al           | 29     | 42      | 15     | 31      | 2.38     | 0.91     | 6.22   | 46.15  |      |                    |      |      |
| 89 - S Jain et al              | 3      | 6       | 1      | 4       | 3.00     | 0.19     | 47.96  | 5.55   |      |                    |      |      |
| Admission to Critical Care     | 783    | 2476    | 649    | 2901    | 2.02     | 1.45     | 2.81   | 100.00 | 0.01 | 40.94              | 4.18 | 0.00 |
| COVID-19                       | 410    | 1910    | 402    | 2345    | 1.78     | 1.19     | 2.68   | 68.25  | 0.10 | 30.53              | 2.78 | 0.01 |
| 12 - OY Antunez-Montes et al   | 0      | 80      | 3      | 153     | 0.27     | 0.01     | 5.23   | 1.15   |      |                    |      |      |
| 136 - G Qian et al             | 0      | 38      | 1      | 16      | 0.13     | 0.01     | 3.48   | 0.97   |      |                    |      |      |
| 13 - AR Araujo da Silva et al  | 5      | 8       | 6      | 13      | 1.94     | 0.32     | 11.76  | 2.82   |      |                    |      |      |
| 142 - S Richardson et al       | 6      | 11      | 3      | 6       | 1.20     | 0.16     | 8.80   | 2.37   |      |                    |      |      |
| 151 - B Sousa et al            | 257    | 859     | 342    | 1499    | 1.44     | 1.20     | 1.75   | 16.49  |      |                    |      |      |
| 153 - P Storch de Gracia et al | 6      | 13      | 1      | 5       | 3.43     | 0.30     | 39.64  | 1.65   |      |                    |      |      |
| 155 - Kyung Sung               | 0      | 18      | 0      | 8       | 0.00     | 0.00     | 0.00   | 0.00   |      |                    |      |      |
| 157 - O Swann et al            | 33     | 58      | 15     | 89      | 6.51     | 3.04     | 13.93  | 9.06   |      |                    |      |      |
| 15 - JP Armann et al           | 1      | 10      | 4      | 28      | 0.67     | 0.07     | 6.79   | 1.81   |      |                    |      |      |
| 163 - S Verma et al            | 6      | 19      | 1      | 9       | 3.69     | 0.37     | 36.57  | 1.85   |      |                    |      |      |
| 21 - D Bayesheva et al         | 2      | 101     | 1      | 137     | 2.75     | 0.25     | 30.72  | 1.69   |      |                    |      |      |
| 224 - Graff et al              | 1      | 11      | 0      | 10      | 3.00     | 0.11     | 82.40  | 0.94   |      |                    |      |      |
| 26 - CE Bolaños-Almeida et al  | 2      | 148     | 2      | 103     | 0.69     | 0.10     | 4.99   | 2.40   |      |                    |      |      |
| 28 - H Cairoli                 | 0      | 101     | 1      | 108     | 0.35     | 0.01     | 8.77   | 1.00   |      |                    |      |      |
| 2 - Centre for Disease Control | 6      | 27      | 0      | 15      | 9.37     | 0.49     | 179.00 | 1.17   |      |                    |      |      |
| 46 - M Ceano-Vivas et al       | 1      | 5       | 0      | 2       | 1.67     | 0.05     | 58.28  | 0.82   |      |                    |      |      |
| 67 - G Fisler et al            | 20     | 38      | 8      | 30      | 3.06     | 1.09     | 8.56   | 6.46   |      |                    |      |      |
| 75 - V Giacomet et al          | 2      | 15      | 1      | 20      | 2.92     | 0.24     | 35.68  | 1.58   |      |                    |      |      |
| 79 - F Gotzinger et al         | 15     | 196     | 2      | 62      | 2.49     | 0.55     | 11.19  | 3.77   |      |                    |      |      |
| 91 - M Kainth et al            | 6      | 31      | 2      | 8       | 0.72     | 0.12     | 4.50   | 2.74   |      |                    |      |      |
| 99 - A Kambhampati             | 41     | 123     | 9      | 24      | 0.83     | 0.34     | 2.06   | 7.52   |      |                    |      |      |

| Name                          | Events |         | Events |         | Effect   |          |        | Weight | P(Q) | I <sup>2</sup> (Q) | Z    | P(Z) |
|-------------------------------|--------|---------|--------|---------|----------|----------|--------|--------|------|--------------------|------|------|
|                               | 1      | Total 1 | 2      | Total 2 | Estimate | CI Start | CI End |        |      |                    |      |      |
| PIMS-TS/MIS-C                 | 373    | 566     | 247    | 556     | 2.65     | 1.48     | 4.74   | 31.75  | 0.25 | 21.32              | 3.27 | 0.00 |
| 10 - Z Almourssa et al        | 3      | 4       | 2      | 2       | 0.47     | 0.01     | 16.89  | 0.81   |      |                    |      |      |
| 12 - OY Antunez-Montes et al  | 10     | 18      | 11     | 31      | 2.27     | 0.69     | 7.44   | 5.36   |      |                    |      |      |
| 13 - AR Araujo da Silva et al | 1      | 1       | 3      | 4       | 1.29     | 0.03     | 53.51  | 0.75   |      |                    |      |      |
| 143 - M Riollano-Cruz et al   | 0      | 7       | 0      | 1       | 0.00     | 0.00     | 0.00   | 0.00   |      |                    |      |      |
| 147 - L Shahbaznejad et al    | 2      | 2       | 4      | 4       | 0.00     | 0.00     | 0.00   | 0.00   |      |                    |      |      |
| 183 - Rekhtman et al          | 8      | 10      | 1      | 2       | 4.00     | 0.17     | 95.76  | 1.02   |      |                    |      |      |
| 187 - R Carbajal et al        | 2      | 2       | 0      | 0       | 0.00     | 0.00     | 0.00   | 0.00   |      |                    |      |      |
| 222 - Belay et al             | 300    | 451     | 197    | 445     | 2.50     | 1.91     | 3.28   | 15.60  |      |                    |      |      |
| 225 - Alkan et al             | 4      | 13      | 0      | 9       | 9.00     | 0.42     | 191.37 | 1.09   |      |                    |      |      |
| 38 - BC Clark et al           | 0      | 11      | 6      | 17      | 0.08     | 0.00     | 1.53   | 1.14   |      |                    |      |      |
| 5 - N Abdel-Haq et al         | 5      | 5       | 4      | 10      | 15.89    | 0.69     | 365.14 | 1.04   |      |                    |      |      |
| 60 - EM Dufort et al          | 38     | 42      | 19     | 31      | 6.00     | 1.70     | 21.12  | 4.93   |      |                    |      |      |
| Death                         | 179    | 3001    | 216    | 4620    | 1.38     | 0.97     | 1.96   | 100.00 | 0.25 | 18.44              | 1.81 | 0.07 |
| COVID-19                      | 171    | 2458    | 207    | 4096    | 1.40     | 0.88     | 2.21   | 87.71  | 0.11 | 40.48              | 1.43 | 0.15 |
| 12 - OY Antunez-Montes et al  | 0      | 80      | 0      | 153     | 0.00     | 0.00     | 0.00   | 0.00   |      |                    |      |      |
| 13 - AR Araujo da Silva et al | 0      | 8       | 0      | 13      | 0.00     | 0.00     | 0.00   | 0.00   |      |                    |      |      |
| 142 - S Richardson et al      | 0      | 11      | 1      | 6       | 0.16     | 0.01     | 4.58   | 1.07   |      |                    |      |      |
| 151 - B Sousa et al           | 82     | 859     | 67     | 1499    | 2.26     | 1.61     | 3.15   | 36.84  |      |                    |      |      |
| 155 - Kyung Sung              | 0      | 18      | 0      | 8       | 0.00     | 0.00     | 0.00   | 0.00   |      |                    |      |      |
| 157 - O Swann et al           | 0      | 58      | 0      | 89      | 0.00     | 0.00     | 0.00   | 0.00   |      |                    |      |      |
| 15 - JP Armann et al          | 0      | 10      | 1      | 28      | 0.87     | 0.03     | 23.17  | 1.12   |      |                    |      |      |
| 227 - Sena et al              | 2      | 38      | 6      | 67      | 0.56     | 0.11     | 2.95   | 4.17   |      |                    |      |      |
| 26 - CE Bolaños-Almeida et al | 0      | 148     | 2      | 103     | 0.14     | 0.01     | 2.88   | 1.30   |      |                    |      |      |
| 28 - H Cairoli                | 1      | 101     | 1      | 108     | 1.07     | 0.07     | 17.34  | 1.54   |      |                    |      |      |
| 46 - M Ceano-Vivas et al      | 0      | 5       | 0      | 2       | 0.00     | 0.00     | 0.00   | 0.00   |      |                    |      |      |
| 58 - H Du et al               | 0      | 30      | 0      | 58      | 0.00     | 0.00     | 0.00   | 0.00   |      |                    |      |      |
| 75 - V Giacomet et al         | 0      | 15      | 0      | 20      | 0.00     | 0.00     | 0.00   | 0.00   |      |                    |      |      |
| 86 - D Hillesheim et al       | 85     | 954     | 129    | 1918    | 1.36     | 1.02     | 1.80   | 40.50  |      |                    |      |      |
| 99 - A Kambhampati            | 1      | 123     | 0      | 24      | 0.60     | 0.02     | 15.17  | 1.16   |      |                    |      |      |

| Name                          | Events |         | Events |         | Effect   |          |        | Weight | P(Q) | I <sup>2</sup> (Q) | Z    | P(Z) |
|-------------------------------|--------|---------|--------|---------|----------|----------|--------|--------|------|--------------------|------|------|
|                               | 1      | Total 1 | 2      | Total 2 | Estimate | CI Start | CI End |        |      |                    |      |      |
| PIMS-TS/MIS-C                 | 8      | 543     | 9      | 524     | 0.82     | 0.31     | 2.13   | 12.29  | 0.80 | 0.00               | 0.41 | 0.68 |
| 10 - Z Almousa et al          | 1      | 4       | 0      | 2       | 2.14     | 0.06     | 77.54  | 0.94   |      |                    |      |      |
| 12 - OY Antunez-Montes et al  | 0      | 18      | 2      | 31      | 0.32     | 0.01     | 7.02   | 1.26   |      |                    |      |      |
| 13 - AR Araujo da Silva et al | 0      | 1       | 0      | 4       | 0.00     | 0.00     | 0.00   | 0.00   |      |                    |      |      |
| 143 - M Riollano-Cruz et al   | 0      | 7       | 0      | 1       | 0.00     | 0.00     | 0.00   | 0.00   |      |                    |      |      |
| 147 - L Shahbaznejad et al    | 1      | 2       | 0      | 4       | 9.00     | 0.22     | 362.48 | 0.89   |      |                    |      |      |
| 183 - Rekhtman et al          | 1      | 10      | 0      | 2       | 0.79     | 0.02     | 25.90  | 0.99   |      |                    |      |      |
| 187 - R Carbajal et al        | 0      | 2       | 0      | 0       | 0.00     | 0.00     | 0.00   | 0.00   |      |                    |      |      |
| 222 - Belay et al             | 4      | 451     | 6      | 445     | 0.65     | 0.18     | 2.34   | 6.70   |      |                    |      |      |
| 60 - EM Dufort et al          | 1      | 42      | 1      | 31      | 0.73     | 0.04     | 12.17  | 1.52   |      |                    |      |      |
| 89 - S Jain et al             | 0      | 6       | 0      | 4       | 0.00     | 0.00     | 0.00   | 0.00   |      |                    |      |      |
| Age >= 15 years               |        |         |        |         |          |          |        |        |      |                    |      |      |
| Invasive Ventilation          | 190    | 2413    | 164    | 2222    | 1.20     | 0.95     | 1.53   | 100.00 | 0.67 | 0.00               | 1.54 | 0.12 |
| COVID-19                      | 185    | 2379    | 161    | 2184    | 1.19     | 0.94     | 1.52   | 97.41  | 0.49 | 0.00               | 1.46 | 0.14 |
| 13 - AR Araujo da Silva et al | 0      | 6       | 1      | 13      | 0.64     | 0.02     | 18.05  | 0.50   |      |                    |      |      |
| 142 - S Richardson et al      | 3      | 20      | 1      | 6       | 0.88     | 0.07     | 10.46  | 0.91   |      |                    |      |      |
| 151 - B Sousa et al           | 85     | 757     | 119    | 1499    | 1.47     | 1.09     | 1.97   | 64.95  |      |                    |      |      |
| 155 - Kyung Sung              | 0      | 62      | 0      | 8       | 0.00     | 0.00     | 0.00   | 0.00   |      |                    |      |      |
| 15 - JP Armann et al          | 1      | 16      | 3      | 28      | 0.56     | 0.05     | 5.84   | 1.01   |      |                    |      |      |
| 163 - S Verma et al           | 3      | 20      | 1      | 9       | 1.41     | 0.13     | 15.78  | 0.96   |      |                    |      |      |
| 21 - D Bayesheva et al        | 1      | 86      | 0      | 137     | 4.82     | 0.19     | 119.78 | 0.54   |      |                    |      |      |
| 221 - Preston et al           | 87     | 1279    | 22     | 245     | 0.74     | 0.45     | 1.21   | 23.34  |      |                    |      |      |
| 28 - H Cairoli                | 0      | 72      | 1      | 108     | 0.49     | 0.02     | 12.30  | 0.54   |      |                    |      |      |
| 46 - M Ceano-Vivas et al      | 0      | 6       | 0      | 2       | 0.00     | 0.00     | 0.00   | 0.00   |      |                    |      |      |
| 54 - A Desai et al            | 5      | 45      | 13     | 109     | 0.92     | 0.31     | 2.76   | 4.65   |      |                    |      |      |
| 75 - V Giacomet et al         | 0      | 10      | 0      | 20      | 0.00     | 0.00     | 0.00   | 0.00   |      |                    |      |      |
| PIMS-TS/MIS-C                 | 5      | 34      | 3      | 38      | 1.63     | 0.37     | 7.06   | 2.59   | 0.89 | 0.00               | 0.65 | 0.52 |
| 13 - AR Araujo da Silva et al | 0      | 1       | 0      | 4       | 0.00     | 0.00     | 0.00   | 0.00   |      |                    |      |      |
| 143 - M Riollano-Cruz et al   | 1      | 4       | 0      | 1       | 1.29     | 0.03     | 53.51  | 0.40   |      |                    |      |      |
| 183 - Rekhtman et al          | 0      | 1       | 0      | 2       | 0.00     | 0.00     | 0.00   | 0.00   |      |                    |      |      |

| Name                          | Events |         | Events |         | Effect   |          |        | Weight | P(Q) | I <sup>2</sup> (Q) | Z    | P(Z) |
|-------------------------------|--------|---------|--------|---------|----------|----------|--------|--------|------|--------------------|------|------|
|                               | 1      | Total 1 | 2      | Total 2 | Estimate | CI Start | CI End |        |      |                    |      |      |
| 41 - RL Crawford et al        | 0      | 2       | 0      | 0       | 0.00     | 0.00     | 0.00   | 0.00   |      |                    |      |      |
| 60 - EM Dufort et al          | 4      | 26      | 3      | 31      | 1.70     | 0.34     | 8.39   | 2.19   |      |                    |      |      |
| Cardiovascular Support        | 19     | 153     | 20     | 193     | 0.95     | 0.21     | 4.34   | 100.00 | 0.23 | 31.54              | 0.07 | 0.94 |
| COVID-19                      | 0      | 120     | 5      | 157     | 0.27     | 0.03     | 2.45   | 38.01  | 0.62 | 0.00               | 1.16 | 0.25 |
| 13 - AR Araujo da Silva et al | 0      | 6       | 0      | 13      | 0.00     | 0.00     | 0.00   | 0.00   |      |                    |      |      |
| 142 - S Richardson et al      | 0      | 20      | 0      | 6       | 0.00     | 0.00     | 0.00   | 0.00   |      |                    |      |      |
| 15 - JP Armann et al          | 0      | 16      | 4      | 28      | 0.16     | 0.01     | 3.27   | 20.10  |      |                    |      |      |
| 28 - H Cairoli                | 0      | 72      | 1      | 108     | 0.49     | 0.02     | 12.30  | 17.91  |      |                    |      |      |
| 46 - M Ceano-Vivas et al      | 0      | 6       | 0      | 2       | 0.00     | 0.00     | 0.00   | 0.00   |      |                    |      |      |
| PIMS-TS/MIS-C                 | 19     | 33      | 15     | 36      | 2.01     | 0.69     | 5.89   | 61.99  | 1.00 | 0.00               | 1.28 | 0.20 |
| 13 - AR Araujo da Silva et al | 0      | 1       | 0      | 4       | 0.00     | 0.00     | 0.00   | 0.00   |      |                    |      |      |
| 143 - M Riollano-Cruz et al   | 0      | 4       | 0      | 1       | 0.00     | 0.00     | 0.00   | 0.00   |      |                    |      |      |
| 41 - RL Crawford et al        | 2      | 2       | 0      | 0       | 0.00     | 0.00     | 0.00   | 0.00   |      |                    |      |      |
| 60 - EM Dufort et al          | 17     | 26      | 15     | 31      | 2.01     | 0.69     | 5.89   | 61.99  |      |                    |      |      |
| Admission to Critical Care    | 1232   | 4793    | 982    | 4038    | 1.35     | 0.95     | 1.93   | 100.00 | 0.00 | 74.33              | 1.66 | 0.10 |
| COVID-19                      | 866    | 4259    | 581    | 3165    | 0.98     | 0.69     | 1.40   | 69.19  | 0.00 | 58.83              | 0.09 | 0.92 |
| 122 - A Moreira et al         | 236    | 1450    | 94     | 789     | 1.44     | 1.11     | 1.86   | 11.80  |      |                    |      |      |
| 13 - AR Araujo da Silva et al | 2      | 6       | 6      | 13      | 0.58     | 0.08     | 4.39   | 2.49   |      |                    |      |      |
| 142 - S Richardson et al      | 9      | 20      | 3      | 6       | 0.82     | 0.13     | 5.08   | 2.91   |      |                    |      |      |
| 151 - B Sousa et al           | 197    | 757     | 342    | 1499    | 1.19     | 0.97     | 1.46   | 12.09  |      |                    |      |      |
| 155 - Kyung Sung              | 0      | 62      | 0      | 8       | 0.00     | 0.00     | 0.00   | 0.00   |      |                    |      |      |
| 157 - O Swann et al           | 19     | 109     | 15     | 89      | 1.04     | 0.50     | 2.19   | 8.11   |      |                    |      |      |
| 15 - JP Armann et al          | 3      | 16      | 4      | 28      | 1.38     | 0.27     | 7.15   | 3.41   |      |                    |      |      |
| 163 - S Verma et al           | 9      | 20      | 1      | 9       | 6.55     | 0.68     | 62.59  | 2.07   |      |                    |      |      |
| 19 - S Bellino et al          | 4      | 137     | 8      | 84      | 0.29     | 0.08     | 0.98   | 5.00   |      |                    |      |      |
| 21 - D Bayesheva et al        | 0      | 86      | 1      | 137     | 0.53     | 0.02     | 13.06  | 1.11   |      |                    |      |      |
| 221 - Preston et al           | 373    | 1279    | 103    | 245     | 0.57     | 0.43     | 0.75   | 11.66  |      |                    |      |      |
| 224 - Graff et al             | 8      | 23      | 0      | 10      | 11.52    | 0.60     | 221.75 | 1.29   |      |                    |      |      |
| 26 - CE Bolaños-Almeida et al | 3      | 176     | 2      | 103     | 0.88     | 0.14     | 5.33   | 2.96   |      |                    |      |      |
| 28 - H Cairoli                | 0      | 72      | 1      | 108     | 0.49     | 0.02     | 12.30  | 1.11   |      |                    |      |      |

| Name                           | Events |         | Events |         | Effect   |          |        | Weight | P(Q) | I <sup>2</sup> (Q) | Z    | P(Z) |
|--------------------------------|--------|---------|--------|---------|----------|----------|--------|--------|------|--------------------|------|------|
|                                | 1      | Total 1 | 2      | Total 2 | Estimate | CI Start | CI End |        |      |                    |      |      |
| 2 - Centre for Disease Control | 2      | 30      | 0      | 15      | 2.72     | 0.12     | 60.29  | 1.19   |      |                    |      |      |
| 46 - M Ceano-Vivas et al       | 1      | 6       | 0      | 2       | 1.36     | 0.04     | 46.65  | 0.94   |      |                    |      |      |
| 75 - V Giacomet et al          | 0      | 10      | 1      | 20      | 0.62     | 0.02     | 16.57  | 1.07   |      |                    |      |      |
| PIMS-TS/MIS-C                  | 366    | 534     | 401    | 873     | 2.56     | 2.03     | 3.21   | 30.81  | 0.96 | 0.00               | 8.06 | 0.00 |
| 13 - AR Araujo da Silva et al  | 1      | 1       | 3      | 4       | 1.29     | 0.03     | 53.51  | 0.85   |      |                    |      |      |
| 143 - M Riollano-Cruz et al    | 0      | 4       | 0      | 1       | 0.00     | 0.00     | 0.00   | 0.00   |      |                    |      |      |
| 179 - J Pang et al             | 1      | 1       | 0      | 0       | 0.00     | 0.00     | 0.00   | 0.00   |      |                    |      |      |
| 183 - Rekhtman et al           | 1      | 1       | 1      | 2       | 3.00     | 0.06     | 151.19 | 0.77   |      |                    |      |      |
| 222 - Belay et al              | 161    | 246     | 197    | 445     | 2.38     | 1.73     | 3.29   | 11.40  |      |                    |      |      |
| 226 - Abrams et al             | 175    | 249     | 175    | 373     | 2.68     | 1.91     | 3.76   | 11.28  |      |                    |      |      |
| 38 - BC Clark et al            | 3      | 4       | 6      | 17      | 5.50     | 0.46     | 65.16  | 1.77   |      |                    |      |      |
| 41 - RL Crawford et al         | 2      | 2       | 0      | 0       | 0.00     | 0.00     | 0.00   | 0.00   |      |                    |      |      |
| 60 - EM Dufort et al           | 22     | 26      | 19     | 31      | 3.47     | 0.96     | 12.59  | 4.74   |      |                    |      |      |
| Death                          | 311    | 4732    | 227    | 8286    | 1.81     | 1.00     | 3.24   | 100.00 | 0.00 | 74.82              | 1.98 | 0.05 |
| COVID-19                       | 300    | 4453    | 220    | 7803    | 1.69     | 0.87     | 3.27   | 84.12  | 0.00 | 78.95              | 1.55 | 0.12 |
| 122 - A Moreira et al          | 25     | 1450    | 13     | 789     | 1.05     | 0.53     | 2.06   | 16.56  |      |                    |      |      |
| 13 - AR Araujo da Silva et al  | 0      | 6       | 0      | 13      | 0.00     | 0.00     | 0.00   | 0.00   |      |                    |      |      |
| 142 - S Richardson et al       | 0      | 20      | 1      | 6       | 0.09     | 0.00     | 2.51   | 2.69   |      |                    |      |      |
| 151 - B Sousa et al            | 74     | 757     | 67     | 1499    | 2.32     | 1.64     | 3.26   | 19.80  |      |                    |      |      |
| 155 - Kyung Sung               | 0      | 62      | 0      | 8       | 0.00     | 0.00     | 0.00   | 0.00   |      |                    |      |      |
| 157 - O Swann et al            | 3      | 109     | 0      | 89      | 5.88     | 0.30     | 115.41 | 3.28   |      |                    |      |      |
| 15 - JP Armann et al           | 0      | 16      | 1      | 28      | 0.56     | 0.02     | 14.45  | 2.81   |      |                    |      |      |
| 227 - Sena et al               | 10     | 66      | 6      | 67      | 1.82     | 0.62     | 5.32   | 12.39  |      |                    |      |      |
| 26 - CE Bolaños-Almeida et al  | 0      | 176     | 2      | 103     | 0.12     | 0.01     | 2.42   | 3.15   |      |                    |      |      |
| 28 - H Cairoli                 | 0      | 72      | 1      | 108     | 0.49     | 0.02     | 12.30  | 2.87   |      |                    |      |      |
| 46 - M Ceano-Vivas et al       | 0      | 6       | 0      | 2       | 0.00     | 0.00     | 0.00   | 0.00   |      |                    |      |      |
| 75 - V Giacomet et al          | 0      | 10      | 0      | 20      | 0.00     | 0.00     | 0.00   | 0.00   |      |                    |      |      |
| 86 - D Hillesheim et al        | 188    | 1703    | 129    | 5071    | 4.75     | 3.77     | 5.99   | 20.56  |      |                    |      |      |
| PIMS-TS/MIS-C                  | 11     | 279     | 7      | 483     | 2.01     | 0.31     | 12.87  | 15.88  | 0.20 | 38.13              | 0.74 | 0.46 |
| 13 - AR Araujo da Silva et al  | 0      | 1       | 0      | 4       | 0.00     | 0.00     | 0.00   | 0.00   |      |                    |      |      |

| Name                                               | Events |         | Events |         | Effect Estimate | CI Start | CI End | Weight | P(Q) | I <sup>2</sup> (Q) | Z    | P(Z) |
|----------------------------------------------------|--------|---------|--------|---------|-----------------|----------|--------|--------|------|--------------------|------|------|
|                                                    | 1      | Total 1 | 2      | Total 2 |                 |          |        |        |      |                    |      |      |
| 143 - M Riollano-Cruz et al                        | 0      | 4       | 0      | 1       | 0.00            | 0.00     | 0.00   | 0.00   |      |                    |      |      |
| 183 - Rekhtman et al                               | 0      | 1       | 0      | 2       | 0.00            | 0.00     | 0.00   | 0.00   |      |                    |      |      |
| 222 - Belay et al                                  | 11     | 245     | 6      | 445     | 3.44            | 1.26     | 9.42   | 13.05  |      |                    |      |      |
| 41 - RL Crawford et al                             | 0      | 2       | 0      | 0       | 0.00            | 0.00     | 0.00   | 0.00   |      |                    |      |      |
| 60 - EM Dufort et al                               | 0      | 26      | 1      | 31      | 0.38            | 0.01     | 9.82   | 2.83   |      |                    |      |      |
| Association between asian race and severe outcomes |        |         |        |         |                 |          |        |        |      |                    |      |      |
| Invasive Ventilation                               | 18     | 134     | 1395   | 13687   | 1.09            | 0.63     | 1.88   | 100.00 | 0.68 | 0.00               | 0.30 | 0.77 |
| COVID-19                                           | 12     | 120     | 1372   | 13633   | 1.20            | 0.65     | 2.21   | 80.66  | 0.58 | 0.00               | 0.58 | 0.56 |
| 142 - S Richardson et al                           | 3      | 12      | 10     | 95      | 2.83            | 0.66     | 12.22  | 14.19  |      |                    |      |      |
| 151 - B Sousa et al                                | 5      | 45      | 750    | 6891    | 1.02            | 0.40     | 2.60   | 34.85  |      |                    |      |      |
| 183 - Rekhtman et al                               | 0      | 0       | 5      | 19      | 0.00            | 0.00     | 0.00   | 0.00   |      |                    |      |      |
| 75 - V Giacomet et al                              | 0      | 15      | 1      | 112     | 2.40            | 0.09     | 61.50  | 2.88   |      |                    |      |      |
| 86 - D Hillesheim et al                            | 4      | 48      | 606    | 6516    | 0.89            | 0.32     | 2.48   | 28.75  |      |                    |      |      |
| PIMS-TS/MIS-C                                      | 6      | 14      | 23     | 54      | 0.72            | 0.21     | 2.52   | 19.34  | 0.41 | 0.00               | 0.51 | 0.61 |
| 167 - E Whittaker et al                            | 4      | 12      | 21     | 46      | 0.60            | 0.16     | 2.26   | 17.06  |      |                    |      |      |
| 179 - J Pang et al                                 | 2      | 2       | 2      | 3       | 3.00            | 0.08     | 115.34 | 2.28   |      |                    |      |      |
| 41 - RL Crawford et al                             | 0      | 0       | 0      | 5       | 0.00            | 0.00     | 0.00   | 0.00   |      |                    |      |      |
| CV support                                         | 6      | 12      | 26     | 84      | 1.19            | 0.33     | 4.25   | 100.00 | 1.00 | 0.00               | 0.27 | 0.79 |
| COVID-19                                           | 0      | 0       | 1      | 33      | 0.00            | 0.00     | 0.00   | 0.00   | 0.00 | 0.00               | 0.00 | 0.00 |
| 46 - M Ceano-Vivas et al                           | 0      | 0       | 1      | 33      | 0.00            | 0.00     | 0.00   | 0.00   |      |                    |      |      |
| PIMS-TS/MIS-C                                      | 6      | 12      | 25     | 51      | 1.19            | 0.33     | 4.25   | 100.00 | 1.00 | 0.00               | 0.27 | 0.79 |
| 167 - E Whittaker et al                            | 6      | 12      | 21     | 46      | 1.19            | 0.33     | 4.25   | 100.00 |      |                    |      |      |
| 41 - RL Crawford et al                             | 0      | 0       | 4      | 5       | 0.00            | 0.00     | 0.00   | 0.00   |      |                    |      |      |
| Admission to critical care                         | 68     | 234     | 2878   | 10652   | 1.25            | 0.92     | 1.69   | 100.00 | 0.76 | 0.00               | 1.40 | 0.16 |
| COVID-19                                           | 56     | 210     | 2821   | 10543   | 1.27            | 0.92     | 1.76   | 88.51  | 0.57 | 0.00               | 1.43 | 0.15 |
| 122 - A Moreira et al                              | 4      | 15      | 101    | 430     | 1.18            | 0.37     | 3.80   | 6.95   |      |                    |      |      |
| 142 - S Richardson et al                           | 6      | 12      | 30     | 95      | 2.17            | 0.65     | 7.28   | 6.44   |      |                    |      |      |
| 151 - B Sousa et al                                | 9      | 45      | 1859   | 6891    | 0.68            | 0.33     | 1.41   | 17.63  |      |                    |      |      |
| 157 - O Swann et al                                | 10     | 58      | 68     | 522     | 1.39            | 0.67     | 2.88   | 17.87  |      |                    |      |      |
| 221 - Preston et al                                | 21     | 56      | 726    | 2374    | 1.36            | 0.79     | 2.36   | 31.48  |      |                    |      |      |

| Name                                               | Events |         | Events |         | Effect Estimate | CI Start | CI End | Weight | P(Q) | I <sup>2</sup> (Q) | Z    | P(Z) |
|----------------------------------------------------|--------|---------|--------|---------|-----------------|----------|--------|--------|------|--------------------|------|------|
|                                                    | 1      | Total 1 | 2      | Total 2 |                 |          |        |        |      |                    |      |      |
| 46 - M Ceano-Vivas et al                           | 0      | 0       | 5      | 33      | 0.00            | 0.00     | 0.00   | 0.00   |      |                    |      |      |
| 67 - G Fidler et al                                | 4      | 9       | 26     | 86      | 1.85            | 0.46     | 7.43   | 4.87   |      |                    |      |      |
| 75 - V Giacomel et al                              | 2      | 15      | 6      | 112     | 2.72            | 0.50     | 14.89  | 3.27   |      |                    |      |      |
| PIMS-TS/MIS-C                                      | 12     | 24      | 57     | 109     | 1.08            | 0.44     | 2.67   | 11.49  | 0.87 | 0.00               | 0.16 | 0.87 |
| 167 - E Whittaker et al                            | 6      | 12      | 23     | 46      | 1.00            | 0.28     | 3.56   | 5.86   |      |                    |      |      |
| 183 - Rekhtman et al                               | 0      | 0       | 12     | 19      | 0.00            | 0.00     | 0.00   | 0.00   |      |                    |      |      |
| 38 - BC Clark et al                                | 6      | 12      | 18     | 39      | 1.17            | 0.32     | 4.26   | 5.64   |      |                    |      |      |
| 41 - RL Crawford et al                             | 0      | 0       | 4      | 5       | 0.00            | 0.00     | 0.00   | 0.00   |      |                    |      |      |
| Death                                              | 6      | 86      | 577    | 7605    | 1.85            | 0.88     | 3.90   | 100.00 | 0.97 | 0.00               | 1.63 | 0.10 |
| COVID-19                                           | 6      | 73      | 574    | 7526    | 1.84            | 0.84     | 4.01   | 90.53  | 0.88 | 0.00               | 1.52 | 0.13 |
| 122 - A Moreira et al                              | 0      | 15      | 12     | 430     | 1.08            | 0.06     | 19.08  | 6.72   |      |                    |      |      |
| 13 - AR Araujo da Silva et al                      | 0      | 0       | 1      | 46      | 0.00            | 0.00     | 0.00   | 0.00   |      |                    |      |      |
| 142 - S Richardson et al                           | 0      | 12      | 1      | 95      | 2.52            | 0.10     | 65.29  | 5.23   |      |                    |      |      |
| 151 - B Sousa et al                                | 6      | 45      | 558    | 6891    | 1.75            | 0.74     | 4.14   | 74.29  |      |                    |      |      |
| 46 - M Ceano-Vivas et al                           | 0      | 0       | 1      | 33      | 0.00            | 0.00     | 0.00   | 0.00   |      |                    |      |      |
| 92 - R Marcello et al                              | 0      | 1       | 1      | 31      | 6.78            | 0.19     | 247.05 | 4.29   |      |                    |      |      |
| PIMS-TS/MIS-C                                      | 0      | 13      | 3      | 79      | 2.05            | 0.18     | 23.03  | 9.47   | 0.64 | 0.00               | 0.58 | 0.56 |
| 143 - M Riollano-Cruz et al                        | 0      | 0       | 1      | 15      | 0.00            | 0.00     | 0.00   | 0.00   |      |                    |      |      |
| 167 - E Whittaker et al                            | 0      | 12      | 1      | 46      | 1.21            | 0.05     | 31.65  | 5.21   |      |                    |      |      |
| 183 - Rekhtman et al                               | 0      | 1       | 1      | 18      | 3.89            | 0.11     | 143.60 | 4.26   |      |                    |      |      |
| Association between black race and severe outcomes |        |         |        |         |                 |          |        |        |      |                    |      |      |
| Invasive Ventilation                               | 123    | 1028    | 1499   | 15538   | 1.38            | 1.11     | 1.70   | 100.00 | 0.58 | 0.00               | 2.93 | 0.00 |
| COVID-19                                           | 107    | 995     | 1474   | 15423   | 1.32            | 1.05     | 1.67   | 94.28  | 0.39 | 4.52               | 2.36 | 0.02 |
| 13 - AR Araujo da Silva et al                      | 0      | 1       | 2      | 14      | 1.67            | 0.05     | 53.92  | 0.38   |      |                    |      |      |
| 142 - S Richardson et al                           | 3      | 27      | 10     | 80      | 0.88            | 0.22     | 3.45   | 2.42   |      |                    |      |      |
| 151 - B Sousa et al                                | 28     | 240     | 727    | 6696    | 1.08            | 0.73     | 1.62   | 28.27  |      |                    |      |      |
| 221 - Preston et al                                | 50     | 478     | 122    | 1952    | 1.75            | 1.24     | 2.48   | 38.17  |      |                    |      |      |
| 54 - A Desai et al                                 | 8      | 54      | 20     | 185     | 1.43            | 0.59     | 3.47   | 5.85   |      |                    |      |      |
| 75 - V Giacomel et al                              | 0      | 4       | 1      | 123     | 9.07            | 0.32     | 255.04 | 0.41   |      |                    |      |      |
| 86 - D Hillesheim et al                            | 18     | 191     | 592    | 6373    | 1.02            | 0.62     | 1.66   | 18.77  |      |                    |      |      |



| Name                          | Events |         | Events |         | Effect   |          |        | Weight | P(Q) | I <sup>2</sup> (Q) | Z    | P(Z) |
|-------------------------------|--------|---------|--------|---------|----------|----------|--------|--------|------|--------------------|------|------|
|                               | 1      | Total 1 | 2      | Total 2 | Estimate | CI Start | CI End |        |      |                    |      |      |
| PIMS-TS/MIS-C                 | 16     | 33      | 25     | 115     | 2.39     | 0.98     | 5.84   | 5.72   | 0.80 | 0.00               | 1.92 | 0.06 |
| 13 - AR Araujo da Silva et al | 0      | 1       | 4      | 45      | 3.07     | 0.11     | 87.20  | 0.41   |      |                    |      |      |
| 143 - M Riollano-Cruz et al   | 1      | 2       | 2      | 13      | 5.50     | 0.23     | 128.97 | 0.46   |      |                    |      |      |
| 167 - E Whittaker et al       | 13     | 22      | 12     | 36      | 2.89     | 0.96     | 8.65   | 3.79   |      |                    |      |      |
| 179 - J Pang et al            | 1      | 1       | 3      | 4       | 1.29     | 0.03     | 53.51  | 0.33   |      |                    |      |      |
| 183 - Rekhtman et al          | 1      | 5       | 4      | 14      | 0.63     | 0.05     | 7.46   | 0.74   |      |                    |      |      |
| 41 - RL Crawford et al        | 0      | 2       | 0      | 3       | 0.00     | 0.00     | 0.00   | 0.00   |      |                    |      |      |
| CV support                    | 16     | 24      | 16     | 72      | 3.09     | 1.07     | 8.88   | 100.00 | 0.99 | 0.00               | 2.09 | 0.04 |
| COVID-19                      | 0      | 0       | 1      | 33      | 0.00     | 0.00     | 0.00   | 0.00   | 0.00 | 0.00               | 0.00 | 0.00 |
| 46 - M Ceano-Vivas et al      | 0      | 0       | 1      | 33      | 0.00     | 0.00     | 0.00   | 0.00   |      |                    |      |      |
| PIMS-TS/MIS-C                 | 16     | 24      | 15     | 39      | 3.09     | 1.07     | 8.88   | 100.00 | 0.99 | 0.00               | 2.09 | 0.04 |
| 167 - E Whittaker et al       | 14     | 22      | 13     | 36      | 3.10     | 1.03     | 9.33   | 91.63  |      |                    |      |      |
| 41 - RL Crawford et al        | 2      | 2       | 2      | 3       | 3.00     | 0.08     | 115.34 | 8.37   |      |                    |      |      |
| Admission to Critical Care    | 352    | 1010    | 2676   | 10082   | 1.61     | 1.16     | 2.23   | 100.00 | 0.01 | 50.51              | 2.87 | 0.00 |
| COVID-19                      | 305    | 940     | 2621   | 9971    | 1.51     | 1.06     | 2.15   | 82.10  | 0.01 | 59.32              | 2.28 | 0.02 |
| 122 - A Moreira et al         | 30     | 114     | 75     | 331     | 1.22     | 0.75     | 1.99   | 14.05  |      |                    |      |      |
| 13 - AR Araujo da Silva et al | 1      | 1       | 25     | 45      | 2.41     | 0.09     | 62.39  | 0.95   |      |                    |      |      |
| 142 - S Richardson et al      | 12     | 27      | 24     | 80      | 1.87     | 0.76     | 4.58   | 8.03   |      |                    |      |      |
| 151 - B Sousa et al           | 53     | 240     | 1814   | 6696    | 0.76     | 0.56     | 1.04   | 17.36  |      |                    |      |      |
| 157 - O Swann et al           | 12     | 46      | 66     | 534     | 2.50     | 1.23     | 5.07   | 10.45  |      |                    |      |      |
| 221 - Preston et al           | 182    | 478     | 565    | 1952    | 1.51     | 1.22     | 1.86   | 18.99  |      |                    |      |      |
| 224 - Graff et al             | 1      | 3       | 10     | 63      | 2.65     | 0.22     | 32.08  | 1.57   |      |                    |      |      |
| 32 - J Chao et al             | 2      | 5       | 11     | 41      | 1.82     | 0.27     | 12.38  | 2.53   |      |                    |      |      |
| 46 - M Ceano-Vivas et al      | 0      | 0       | 5      | 33      | 0.00     | 0.00     | 0.00   | 0.00   |      |                    |      |      |
| 67 - G Fisler et al           | 12     | 22      | 18     | 73      | 3.67     | 1.36     | 9.90   | 7.05   |      |                    |      |      |
| 75 - V Giacomet et al         | 0      | 4       | 8      | 123     | 1.51     | 0.07     | 30.44  | 1.11   |      |                    |      |      |
| PIMS-TS/MIS-C                 | 47     | 70      | 55     | 111     | 2.13     | 0.96     | 4.75   | 17.90  | 0.29 | 18.72              | 1.85 | 0.06 |
| 13 - AR Araujo da Silva et al | 1      | 1       | 11     | 14      | 0.91     | 0.03     | 27.83  | 0.87   |      |                    |      |      |
| 167 - E Whittaker et al       | 13     | 22      | 16     | 36      | 1.81     | 0.62     | 5.29   | 6.35   |      |                    |      |      |
| 183 - Rekhtman et al          | 2      | 5       | 10     | 14      | 0.27     | 0.03     | 2.25   | 2.09   |      |                    |      |      |

| Name                                              | Events |         | Events |         | Effect   |          |        | Weight | P(Q) | I <sup>2</sup> (Q) | Z    | P(Z) |
|---------------------------------------------------|--------|---------|--------|---------|----------|----------|--------|--------|------|--------------------|------|------|
|                                                   | 1      | Total 1 | 2      | Total 2 | Estimate | CI Start | CI End |        |      |                    |      |      |
| 38 - BC Clark et al                               | 11     | 15      | 13     | 36      | 4.87     | 1.29     | 18.42  | 4.63   |      |                    |      |      |
| 41 - RL Crawford et al                            | 2      | 2       | 2      | 3       | 3.00     | 0.08     | 115.34 | 0.77   |      |                    |      |      |
| 5 - N Abdel-Haq et al                             | 18     | 25      | 3      | 8       | 4.29     | 0.80     | 22.92  | 3.19   |      |                    |      |      |
| Death                                             | 25     | 415     | 558    | 7276    | 1.50     | 0.79     | 2.83   | 100.00 | 0.34 | 12.18              | 1.25 | 0.21 |
| COVID-19                                          | 24     | 386     | 556    | 7213    | 1.91     | 0.71     | 5.12   | 89.69  | 0.13 | 43.60              | 1.29 | 0.20 |
| 122 - A Moreira et al                             | 6      | 114     | 6      | 331     | 3.01     | 0.95     | 9.53   | 22.55  |      |                    |      |      |
| 13 - AR Araujo da Silva et al                     | 0      | 1       | 1      | 45      | 9.89     | 0.27     | 358.47 | 3.01   |      |                    |      |      |
| 142 - S Richardson et al                          | 1      | 27      | 0      | 80      | 9.11     | 0.36     | 230.51 | 3.69   |      |                    |      |      |
| 151 - B Sousa et al                               | 17     | 240     | 547    | 6696    | 0.86     | 0.52     | 1.41   | 57.00  |      |                    |      |      |
| 46 - M Ceano-Vivas et al                          | 0      | 0       | 1      | 33      | 0.00     | 0.00     | 0.00   | 0.00   |      |                    |      |      |
| 92 - R Marcello et al                             | 0      | 4       | 1      | 28      | 2.04     | 0.07     | 58.19  | 3.44   |      |                    |      |      |
| PIMS-TS/MIS-C                                     | 1      | 29      | 2      | 63      | 1.96     | 0.28     | 13.56  | 10.31  | 0.74 | 0.00               | 0.68 | 0.50 |
| 143 - M Riollano-Cruz et al                       | 0      | 2       | 1      | 13      | 1.67     | 0.05     | 53.92  | 3.20   |      |                    |      |      |
| 167 - E Whittaker et al                           | 1      | 22      | 0      | 36      | 5.09     | 0.20     | 130.65 | 3.66   |      |                    |      |      |
| 183 - Rekhtman et al                              | 0      | 5       | 1      | 14      | 0.82     | 0.03     | 23.34  | 3.44   |      |                    |      |      |
| Association between white race and severe outcome |        |         |        |         |          |          |        |        |      |                    |      |      |
| Invasive Ventilation                              | 428    | 4873    | 1203   | 11796   | 0.85     | 0.67     | 1.07   | 100.00 | 0.12 | 33.25              | 1.42 | 0.16 |
| COVID-19                                          | 420    | 4843    | 1172   | 11710   | 0.85     | 0.71     | 1.03   | 94.91  | 0.22 | 26.21              | 1.67 | 0.09 |
| 13 - AR Araujo da Silva et al                     | 3      | 24      | 1      | 22      | 3.00     | 0.29     | 31.22  | 0.95   |      |                    |      |      |
| 142 - S Richardson et al                          | 0      | 20      | 13     | 87      | 0.13     | 0.01     | 2.36   | 0.64   |      |                    |      |      |
| 151 - B Sousa et al                               | 224    | 2110    | 531    | 4826    | 0.96     | 0.81     | 1.13   | 33.07  |      |                    |      |      |
| 174 - P Zachariah et al                           | 5      | 27      | 4      | 23      | 1.08     | 0.25     | 4.61   | 2.38   |      |                    |      |      |
| 221 - Preston et al                               | 38     | 639     | 134    | 1791    | 0.78     | 0.54     | 1.13   | 19.55  |      |                    |      |      |
| 54 - A Desai et al                                | 12     | 109     | 16     | 184     | 1.30     | 0.59     | 2.86   | 7.03   |      |                    |      |      |
| 75 - V Giacomet et al                             | 0      | 95      | 1      | 32      | 0.11     | 0.00     | 2.77   | 0.50   |      |                    |      |      |
| 86 - D Hillesheim et al                           | 138    | 1819    | 472    | 4745    | 0.74     | 0.61     | 0.91   | 30.80  |      |                    |      |      |
| PIMS-TS/MIS-C                                     | 8      | 30      | 31     | 86      | 1.02     | 0.16     | 6.34   | 5.09   | 0.08 | 51.54              | 0.02 | 0.98 |
| 13 - AR Araujo da Silva et al                     | 2      | 5       | 0      | 9       | 13.57    | 0.51     | 358.64 | 0.49   |      |                    |      |      |
| 143 - M Riollano-Cruz et al                       | 0      | 2       | 3      | 13      | 0.60     | 0.02     | 15.76  | 0.49   |      |                    |      |      |
| 167 - E Whittaker et al                           | 5      | 18      | 20     | 40      | 0.38     | 0.12     | 1.28   | 3.36   |      |                    |      |      |

| Name                          | Events |         | Events |         | Effect   |          |        | Weight | P(Q) | I <sup>2</sup> (Q) | Z    | P(Z) |
|-------------------------------|--------|---------|--------|---------|----------|----------|--------|--------|------|--------------------|------|------|
|                               | 1      | Total 1 | 2      | Total 2 | Estimate | CI Start | CI End |        |      |                    |      |      |
| 179 - J Pang et al            | 0      | 1       | 4      | 4       | 0.04     | 0.00     | 2.82   | 0.28   |      |                    |      |      |
| 183 - Rekhtman et al          | 1      | 1       | 4      | 18      | 9.67     | 0.33     | 281.33 | 0.46   |      |                    |      |      |
| 41 - RL Crawford et al        | 0      | 3       | 0      | 2       | 0.00     | 0.00     | 0.00   | 0.00   |      |                    |      |      |
| CV support                    | 6      | 49      | 26     | 47      | 0.19     | 0.06     | 0.58   | 100.00 | 0.71 | 0.00               | 2.89 | 0.00 |
| COVID-19                      | 0      | 28      | 1      | 5       | 0.05     | 0.00     | 1.50   | 11.44  | 0.00 | 100.00             | 1.72 | 0.09 |
| 46 - M Ceano-Vivas et al      | 0      | 28      | 1      | 5       | 0.05     | 0.00     | 1.50   | 11.44  |      |                    |      |      |
| PIMS-TS/MIS-C                 | 6      | 21      | 25     | 42      | 0.22     | 0.07     | 0.74   | 88.56  | 0.82 | 0.00               | 2.45 | 0.01 |
| 167 - E Whittaker et al       | 4      | 18      | 23     | 40      | 0.21     | 0.06     | 0.76   | 78.92  |      |                    |      |      |
| 41 - RL Crawford et al        | 2      | 3       | 2      | 2       | 0.33     | 0.01     | 12.82  | 9.65   |      |                    |      |      |
| Admission to Critical Care    | 889    | 3408    | 2143   | 7683    | 0.63     | 0.46     | 0.87   | 100.00 | 0.00 | 65.88              | 2.81 | 0.00 |
| COVID-19                      | 870    | 3356    | 2060   | 7555    | 0.72     | 0.53     | 1.00   | 85.80  | 0.00 | 70.05              | 1.96 | 0.05 |
| 122 - A Moreira et al         | 17     | 102     | 88     | 343     | 0.58     | 0.33     | 1.03   | 11.81  |      |                    |      |      |
| 13 - AR Araujo da Silva et al | 16     | 24      | 10     | 22      | 2.40     | 0.73     | 7.92   | 5.23   |      |                    |      |      |
| 142 - S Richardson et al      | 3      | 20      | 33     | 87      | 0.29     | 0.08     | 1.06   | 4.60   |      |                    |      |      |
| 151 - B Sousa et al           | 598    | 2110    | 1269   | 4826    | 1.11     | 0.99     | 1.24   | 18.58  |      |                    |      |      |
| 157 - O Swann et al           | 32     | 307     | 46     | 273     | 0.57     | 0.35     | 0.93   | 13.27  |      |                    |      |      |
| 221 - Preston et al           | 191    | 639     | 556    | 1791    | 0.95     | 0.78     | 1.15   | 17.76  |      |                    |      |      |
| 224 - Graff et al             | 1      | 13      | 10     | 53      | 0.36     | 0.04     | 3.09   | 1.98   |      |                    |      |      |
| 32 - J Chao et al             | 2      | 3       | 11     | 43      | 5.82     | 0.48     | 70.62  | 1.52   |      |                    |      |      |
| 46 - M Ceano-Vivas et al      | 3      | 28      | 2      | 5       | 0.18     | 0.02     | 1.55   | 1.98   |      |                    |      |      |
| 67 - G Fisler et al           | 3      | 15      | 27     | 80      | 0.49     | 0.13     | 1.89   | 4.36   |      |                    |      |      |
| 75 - V Giacomet et al         | 4      | 95      | 8      | 32      | 0.13     | 0.04     | 0.48   | 4.71   |      |                    |      |      |
| PIMS-TS/MIS-C                 | 19     | 52      | 83     | 128     | 0.31     | 0.15     | 0.66   | 14.20  | 0.51 | 0.00               | 3.05 | 0.00 |
| 13 - AR Araujo da Silva et al | 4      | 5       | 8      | 9       | 0.50     | 0.02     | 10.25  | 1.06   |      |                    |      |      |
| 167 - E Whittaker et al       | 7      | 18      | 22     | 40      | 0.52     | 0.17     | 1.62   | 5.63   |      |                    |      |      |
| 183 - Rekhtman et al          | 1      | 1       | 11     | 18      | 1.96     | 0.07     | 54.67  | 0.88   |      |                    |      |      |
| 38 - BC Clark et al           | 5      | 22      | 19     | 29      | 0.15     | 0.04     | 0.54   | 4.84   |      |                    |      |      |
| 41 - RL Crawford et al        | 2      | 3       | 2      | 2       | 0.33     | 0.01     | 12.82  | 0.74   |      |                    |      |      |
| 5 - N Abdel-Haq et al         | 0      | 3       | 21     | 30      | 0.06     | 0.00     | 1.35   | 1.04   |      |                    |      |      |
| Death                         | 131    | 2326    | 452    | 5370    | 0.65     | 0.54     | 0.80   | 100.00 | 0.84 | 0.00               | 4.16 | 0.00 |

| Name                                                     | Events |         | Events |         | Effect   |          |         | Weight | P(Q) | I <sup>2</sup> (Q) | Z    | P(Z) |
|----------------------------------------------------------|--------|---------|--------|---------|----------|----------|---------|--------|------|--------------------|------|------|
|                                                          | 1      | Total 1 | 2      | Total 2 | Estimate | CI Start | CI End  |        |      |                    |      |      |
| COVID-19                                                 | 131    | 2302    | 449    | 5297    | 0.65     | 0.53     | 0.79    | 98.99  | 0.70 | 0.00               | 4.23 | 0.00 |
| 122 - A Moreira et al                                    | 2      | 102     | 10     | 343     | 0.67     | 0.14     | 3.09    | 1.69   |      |                    |      |      |
| 13 - AR Araujo da Silva et al                            | 0      | 24      | 1      | 22      | 0.29     | 0.01     | 7.56    | 0.38   |      |                    |      |      |
| 142 - S Richardson et al                                 | 0      | 20      | 1      | 87      | 1.41     | 0.06     | 35.79   | 0.38   |      |                    |      |      |
| 151 - B Sousa et al                                      | 129    | 2110    | 435    | 4826    | 0.66     | 0.54     | 0.81    | 95.83  |      |                    |      |      |
| 46 - M Ceano-Vivas et al                                 | 0      | 28      | 1      | 5       | 0.05     | 0.00     | 1.50    | 0.35   |      |                    |      |      |
| 92 - R Marcello et al                                    | 0      | 18      | 1      | 14      | 0.24     | 0.01     | 6.44    | 0.37   |      |                    |      |      |
| PIMS-TS/MIS-C                                            | 0      | 24      | 3      | 73      | 1.57     | 0.22     | 11.39   | 1.01   | 0.79 | 0.00               | 0.44 | 0.66 |
| 143 - M Riollano-Cruz et al                              | 0      | 2       | 1      | 13      | 1.67     | 0.05     | 53.92   | 0.33   |      |                    |      |      |
| 167 - E Whittaker et al                                  | 0      | 18      | 1      | 40      | 0.71     | 0.03     | 18.32   | 0.38   |      |                    |      |      |
| 183 - Rekhtman et al                                     | 0      | 1       | 1      | 18      | 3.89     | 0.11     | 143.60  | 0.30   |      |                    |      |      |
| 41 - RL Crawford et al                                   | 0      | 3       | 0      | 2       | 0.00     | 0.00     | 0.00    | 0.00   |      |                    |      |      |
| Comparison between hispanic ethnicity and severe disease |        |         |        |         |          |          |         |        |      |                    |      |      |
| Invasive Ventilation                                     | 64     | 1001    | 141    | 1725    | 0.76     | 0.35     | 1.68    | 100.00 | 0.16 | 37.59              | 0.67 | 0.50 |
| COVID-19                                                 | 62     | 985     | 135    | 1707    | 0.98     | 0.36     | 2.67    | 84.30  | 0.08 | 55.15              | 0.04 | 0.97 |
| 174 - P Zachariah et al                                  | 4      | 25      | 5      | 25      | 0.76     | 0.18     | 3.25    | 18.39  |      |                    |      |      |
| 221 - Preston et al                                      | 55     | 936     | 117    | 1494    | 0.73     | 0.53     | 1.02    | 44.50  |      |                    |      |      |
| 54 - A Desai et al                                       | 2      | 17      | 13     | 68      | 0.56     | 0.11     | 2.78    | 16.28  |      |                    |      |      |
| 75 - V Giacomet et al                                    | 1      | 7       | 0      | 120     | 55.62    | 2.06     | 1502.58 | 5.14   |      |                    |      |      |
| PIMS-TS/MIS-C                                            | 2      | 16      | 6      | 18      | 0.29     | 0.05     | 1.79    | 15.70  | 0.59 | 0.00               | 1.33 | 0.18 |
| 143 - M Riollano-Cruz et al                              | 1      | 10      | 2      | 5       | 0.17     | 0.01     | 2.56    | 7.13   |      |                    |      |      |
| 183 - Rekhtman et al                                     | 1      | 6       | 4      | 13      | 0.45     | 0.04     | 5.21    | 8.57   |      |                    |      |      |
| Cardiovascular Support                                   | 0      | 2       | 0      | 31      | 0.00     | 0.00     | 0.00    | 0.00   | 0.00 | 0.00               | 0.00 | 0.00 |
| COVID-19                                                 | 0      | 0       | 0      | 0       | 0.00     | 0.00     | 0.00    | 0.00   | 0.00 | 0.00               | 0.00 | 0.00 |
| PIMS-TS/MIS-C                                            | 0      | 2       | 0      | 31      | 0.00     | 0.00     | 0.00    | 0.00   | 0.00 | 0.00               | 0.00 | 0.00 |
| 5 - N Abdel-Haq et al                                    | 0      | 2       | 0      | 31      | 0.00     | 0.00     | 0.00    | 0.00   |      |                    |      |      |
| Admission to critical care                               | 279    | 1038    | 560    | 1756    | 0.72     | 0.32     | 1.63    | 100.00 | 0.01 | 63.66              | 0.78 | 0.43 |
| COVID-19                                                 | 276    | 1030    | 530    | 1712    | 0.88     | 0.35     | 2.23    | 84.15  | 0.01 | 71.81              | 0.26 | 0.79 |
| 221 - Preston et al                                      | 255    | 936     | 492    | 1494    | 0.76     | 0.64     | 0.91    | 27.52  |      |                    |      |      |
| 224 - Graff et al                                        | 8      | 40      | 3      | 26      | 1.92     | 0.46     | 8.02    | 15.00  |      |                    |      |      |

| Name                        | Events |         | Events |         | Effect   |          |        | Weight | P(Q) | I <sup>2</sup> (Q) | Z    | P(Z) |
|-----------------------------|--------|---------|--------|---------|----------|----------|--------|--------|------|--------------------|------|------|
|                             | 1      | Total 1 | 2      | Total 2 | Estimate | CI Start | CI End |        |      |                    |      |      |
| 32 - J Chao et al           | 3      | 29      | 10     | 17      | 0.08     | 0.02     | 0.38   | 14.01  |      |                    |      |      |
| 67 - G Fidler et al         | 9      | 18      | 18     | 55      | 2.06     | 0.70     | 6.07   | 18.70  |      |                    |      |      |
| 75 - V Giacomini et al      | 1      | 7       | 7      | 120     | 2.69     | 0.28     | 25.54  | 8.92   |      |                    |      |      |
| 10PIMS-TS/MIS-C             | 3      | 8       | 30     | 44      | 0.24     | 0.04     | 1.32   | 15.85  | 0.48 | 0.00               | 1.64 | 0.10 |
| 183 - Rekhtman et al        | 2      | 6       | 10     | 13      | 0.15     | 0.02     | 1.26   | 9.59   |      |                    |      |      |
| 5 - N Abdel-Haq et al       | 1      | 2       | 20     | 31      | 0.55     | 0.03     | 9.68   | 6.26   |      |                    |      |      |
| Death                       | 6      | 209     | 9      | 298     | 0.94     | 0.30     | 2.93   | 100.00 | 0.36 | 6.42               | 0.11 | 0.91 |
| COVID-19                    | 5      | 193     | 8      | 280     | 0.88     | 0.28     | 2.74   | 78.06  | 0.46 | 0.00               | 0.22 | 0.82 |
| 122 - A Moreira et al       | 4      | 176     | 8      | 265     | 0.75     | 0.22     | 2.52   | 66.49  |      |                    |      |      |
| 92 - R Marcello et al       | 1      | 17      | 0      | 15      | 2.82     | 0.11     | 74.51  | 11.58  |      |                    |      |      |
| PIMS-TS/MIS-C               | 1      | 16      | 1      | 18      | 1.03     | 0.02     | 49.24  | 21.94  | 0.10 | 62.00              | 0.02 | 0.99 |
| 143 - M Riollano-Cruz et al | 0      | 10      | 1      | 5       | 0.14     | 0.00     | 4.22   | 10.86  |      |                    |      |      |
| 183 - Rekhtman et al        | 1      | 6       | 0      | 13      | 7.36     | 0.26     | 210.02 | 11.08  |      |                    |      |      |

**Acknowledgements:** Thanks to the following authors of studies who provided individual patient data or additional aggregated data for inclusion in the meta-analysis.

Ho Kyung Sung, Jin Yong Kim, Jeonghun Heo, Haesook Seo, Young soo Jan, Hyewon Kim, Bo Ram Koh, Neungsun Jo, Hong Sang Oh, Young Mi Baek, Kyung-Haw Park, Jeung A Shon, Min-Chul Kim, Joon Ho Kim, Hyun-Ha Chang, Yukyung Park, Yu Min Kang, Dong Hyun Lee, Dong Hyun Oh, Hyun Jung Park, Kyoung-Ho Song, Eun Kyoung Lee, Hyeongseok Jeong, Ji Yeon Lee, Ja-Young Ko, Johee Choi, Eun Hwa Ryu, Ki-hyun Chung, Myoung-don Oh, Dinagul Bayesheva , Riza Boranbayeva , Bayan Turdalina , Ildar Fakhriyev, Timur Saliev , Shynar Tanabayeva , Baurzhan Zhussupov, Talgat Nurgozhin, S Jain, S Sen, S Lakshmivenkateshiah, P Bobhate, S Venkatesh, S Udani, L Shobhavat, P Andankar, T Karande, S Kulkarni, Jakob Peter Armann, Natalie Diffloth, Arne Simon, Maren Doenhardt, Markus Hufnagel, Andreas Trotter, Dominik Schneider, Johannes Hübner, Reinhard Berner, Vania Giacomet, Lucia Barcellini, Marta Stracuzzi, Emma Longoni, Laura Folgori, Alessandro Leone, Gian Vincenzo Zuccotti, María de Ceano-Vivas, Irene Martín-Espín, Teresa del Rosal, Marta Bueno-Barriocanal, Marta Plata-Gallardo, José Antonio Ruiz-Domínguez, Rosario López-López, Miguel Ángel Molina-Gutiérrez, Patricia Bote-Gascón,, Isabel González-Bertolín, Paula García-Sánchez, Julia Martín-Sánchez, Begoña de Miguel-Lavisier, Talía Sainz, Fernando Baquero-Artigao, Ana Méndez-Echevarría, Cristina Calvo2, Jasmin Pfefferle, Angela Zacharasiewicz, Matthias Bogyi, Florian Götzinger, Angelika Berger, Roland Berger, Volker Strenger, Daniela S. Kohlfürst, Anna Zschocke, Benoît Bernar; Burkhard Simma, Edda Haberlandt, Christina Thir, Ariane Biebl, Christelle Christiaens, Marine Creuven, Koen Vanden Driessche, Tine Boiy, Daan Van Brusselen, An Bael, Sara Debulpaep, Petra Schelstraete, Natalia Gabrovská, Svetlana Velizarova, Nina Krajcar, Srđan Roglić, Ivan Pavić, Ulrikka Nygaard, Jonathan Peter Glenthøj, Lise Heilmann Jensen, Ilona Lind, Mihhail Tistsenko, Ülle Uustalu, Folke Brinkmann, Laura Buchtala, Stephanie Thee, Robin Kobbe, Cornelius Rau, Nicolaus Schwerk, Michael Barker, Maria Tsolia, Irini Eleftheriou, Patrick Gavin, Oksana Kozdoba, Borbála Zsigmond, Laura Lancella, Francesca I Calò Carducci, Danilo Buonsenso, Piero Valentini, Andrea Lo Vecchio, Marcello Lanari, Luca Pierantoni, Inga Ivaškevičienė, Rimvydas Ivaškevičius, Valentina Vilc, Elisabeth Schölvinck, Astrid Rojahn, Anastasios Smyrniaios, Claus Klingenberg, Isabel Carvalho, Andreia Ribeiro, Anna Starshinova, Ivan Solovic, Petra Prunk, Veronika Osterman, Uros Krivec, Begoña Santiago-García, Mar Santos, Antoni Noguera-Julian, Miguel Lanaspa, Antoni Soriano Arandes, Susana Melendo, Lola Falcón, Olaf Neth, Mario Pérez-Butragueño, Laura Minguell, Matilde Bustillo, Aida María Gutiérrez-Sánchez, Borja Guarch Ibáñez, Dr. Josep Trueta, Francesc Ripoll, Beatriz Soto, Karsten Kötz, Noémie Wagner, Arnaud G. L’Huillier, Ulrich Heininger, Hanna Schmid, Nicole Ritz, Petra Zimmermann, Franziska Zucol, Anita Niederer, Michael Buettcher, Benhur Sirvan Cetin, Olga Bilogortseva, Vera Chechenyeva, Marc Tebruegge, Delane Shingadia, Alicia Demirjian, Srinu Bandi, Steven B Welch, Fiona Shackley, Lynne McFetridge, Lynne Speirs, Conor Doherty, Laura Jones, Paddy McMaster, Clare Murray, Frances Child, Yvonne Beuvink, Nick Makwana, Elizabeth Whittaker, Amanda Williams, Katy Fidler, Jolanta Bernatoniene, Rinn Song, Zoe Oliver, Andrew Riordan, Alasdair Bamford, Julia Kenny, Myrsini Kaforou, Christime E. Jones, Priyen Shah, Padmanabhan Ramnarayan, Alain Fraisse, Owen Miller, Patrick Davies, Filip Kucera, Joe Brierley, Marilyn McDougall, Michael Carter, Adriana Tremoulet, Chisato Shimizu, Jethro Herberg, Jane C Burns, Hermione Lyall, Michael Levin, Roopa Marcello, Johanna Dolle, Sheila Grami, Richard Adule, Zeyu Li, Kathleen Tatem, Chinyere Anyaogu, Stephen Apfelroth, Raji Ayinla, Noella Boma, Terence Brady, Braulio F. Cosme-Thormann, Roseann Costarella, Kenra Ford, Kecia Gaither, Jessica Jacobson, Marc Kanter, Stuart Kessler, Ross B. Kristal, Joseph J. Lieber, Vikramjit Mukherjee, Vincent Rizzo, Jr., Madden Rowell, David Stevens, Elana Sydney, Andrew Wallach, Dave A. Chokshi, Nichola Davis, Alvaro Moreira, Kevin Chorath, Karthik Rajesekaran, Fiona Burmeister, Mubbasheer Ahmed, Axel Moreira, Safiya Richardson, Jamie S Hirsch, Mangala Narasimhan, James M Crawford, Thomas McGinn, Karina W Davidson, Maraiawy Riollano-Cruz, Esra Akkoyun, Eudos Briceno-Brito, Shanna Kowalsky, Roberto Posada, Emilia Mia Sordillo, Michael Tosi, Rebecca Trachtman, Alberto Paniz-Mondolfi, Sergey Rekhtman, Rachel tennenbaum, Andrew Strunk, Morgan Birabaharan, Shari Wright, Amit Garg, AR Araujo da Silva, CGB Fonseca, JLPS Miranda, BV Travassos, CR Baião, KD Silva, LBAE dos Santos, MMR de Britto, PALS Cerqueira, SNB Pereira, RBJ Rios, CS Vieira, IA Leal, NC Martins, LMAC dr Carvalho, AB Pereira, CH Teixeira, Braian LA Sousa, Magda Sampaio-Carneiro, Werther B de Carvalho,

Clovis A Silva, Alexandre A Ferraro, CE Bolaños-Almeida, OM Espitia Segura, Héctor Cairoli, Silvana Riden, María J Chiolo, Sandra Di Lalla, Fernando Ferrero, Jb Vitoeereo, Edgardo Checacci, Carolina Davenport, Paula Dominguez, Horacio Planovsky, Fabian Gambarruta, Mariano Ibarra, Maria Fabiana Ossorio, Javier Potasnik, Norma Schenone, Milagros, Torrents and Fernando Torres.
